# Supplementary material for: Characterization of lncRNA-Perturbed TLR-Signaling Network Identifies Novel lncRNA Prognostic Biomarkers in Colorectal Cancer
Source: Front Cell Dev Biol. 2020 Jun 18;8:503. doi: 10.3389/fcell.2020.00503 (PMC7314994; doi:10.3389/fcell.2020.00503)
Supplement: TABLE S1 — Lists of differentially expressed lncRNAs and TLR-related genes between 41 paired CRC and control samples. [file Table_1.XLSX]

## Sheet: 17 DELTRgenes
Ensembl id	log2FoldChange	pvalue
ENSG00000118785	3.7813	5.60602e-34
ENSG00000271503	-1.41053	4.91156e-14
ENSG00000138755	1.26355	1.34413e-05
ENSG00000277632	1.3323	3.11078e-09
ENSG00000164342	-1.94482	1.47611e-28
ENSG00000169245	1.93522	5.46307e-12
ENSG00000169248	3.15568	5.31924e-26
ENSG00000276085	1.47204	1.55397e-10
ENSG00000109339	-1.83358	1.52035e-26
ENSG00000129988	2.44872	2.52615e-08
ENSG00000136244	1.37812	3.37698e-05
ENSG00000125538	1.44407	5.12472e-09
ENSG00000184216	1.18419	4.06121e-21
ENSG00000174125	-1.055	1.76826e-14
ENSG00000196664	-1.75168	2.03995e-27
ENSG00000154589	-1.29197	1.16393e-09
ENSG00000169429	3.93048	6.52342e-39

## Sheet: 2338 DELTR-genes
Ensembl id	log2FoldChange	pvalue
ENSG00000181085	4.03961	2.8762e-90
ENSG00000161243	-1.71835	1.5333e-13
ENSG00000134532	-1.66442	1.6727e-19
ENSG00000102048	1.98282	2.77566e-24
ENSG00000155816	-4.16058	3.46893e-37
ENSG00000133612	1.21533	7.44553e-35
ENSG00000102010	-2.8399	2.57018e-63
ENSG00000197943	-1.87249	1.37238e-27
ENSG00000005249	-2.1261	6.77643e-30
ENSG00000068831	-1.50681	5.8252e-14
ENSG00000077157	-2.24407	8.02871e-27
ENSG00000081320	-1.14711	5.4053e-12
ENSG00000077264	-2.09038	2.02248e-19
ENSG00000138031	1.20827	4.7611e-20
ENSG00000138411	1.27115	1.03036e-14
ENSG00000149554	1.06555	1.12215e-21
ENSG00000058668	-1.67444	1.91724e-18
ENSG00000114541	-1.12319	4.31787e-21
ENSG00000120756	-1.40922	5.45301e-20
ENSG00000116574	-1.44878	8.59948e-26
ENSG00000054356	-2.0301	1.45732e-14
ENSG00000065413	-1.04251	7.99482e-16
ENSG00000144785	1.52132	0.0055753
ENSG00000168875	5.81047	6.26414e-21
ENSG00000186868	-2.81959	4.3524e-27
ENSG00000188906	-1.72118	9.70177e-20
ENSG00000086717	3.05036	2.41219e-21
ENSG00000108106	1.71557	6.67801e-40
ENSG00000136044	-1.82032	6.02774e-44
ENSG00000170312	1.38881	8.73056e-16
ENSG00000182968	2.0971	4.80509e-06
ENSG00000116991	-1.3493	8.92984e-36
ENSG00000146411	1.6682	1.17761e-12
ENSG00000151702	-1.26204	8.58056e-23
ENSG00000127564	2.07765	1.23612e-42
ENSG00000131650	2.18138	1.56248e-25
ENSG00000174672	2.05741	3.48563e-11
ENSG00000066279	1.08373	3.46275e-08
ENSG00000189221	-2.05659	7.40356e-54
ENSG00000094804	1.52678	3.0401e-26
ENSG00000235098	-1.44923	6.47264e-10
ENSG00000237452	2.54228	3.83727e-05
ENSG00000182580	1.84191	1.4133e-17
ENSG00000069535	-2.77564	4.00882e-30
ENSG00000176490	-2.66333	1.107e-37
ENSG00000189045	-1.12256	1.1e-07
ENSG00000181804	-2.18292	1.28636e-55
ENSG00000131747	1.18521	2.43981e-13
ENSG00000176160	-1.71474	3.74445e-05
ENSG00000134242	-1.00372	2.45811e-08
ENSG00000101445	-1.81396	5.03332e-31
ENSG00000070808	-2.02302	4.42565e-19
ENSG00000131746	3.1268	2.64178e-42
ENSG00000137628	-1.64679	5.92678e-14
ENSG00000119771	1.27856	3.38568e-13
ENSG00000175906	-1.71894	2.59917e-21
ENSG00000146122	-1.81784	3.7305e-36
ENSG00000171056	-1.11627	2.68009e-14
ENSG00000132854	-1.94637	3.9962e-21
ENSG00000168918	1.06124	2.1176e-11
ENSG00000165806	-1.72564	9.76028e-51
ENSG00000118515	-2.42298	2.05158e-30
ENSG00000180777	-1.06458	0.0130767
ENSG00000117650	1.42221	2.30903e-33
ENSG00000011052	1.35559	1.5572e-14
ENSG00000173156	1.10047	3.48179e-07
ENSG00000239672	1.73629	5.33755e-37
ENSG00000147224	1.04993	5.12186e-21
ENSG00000018408	-1.01485	1.86663e-10
ENSG00000185046	-3.0428	2.99878e-27
ENSG00000143507	1.23566	5.18042e-16
ENSG00000136573	-2.91888	5.15345e-21
ENSG00000049246	-1.84578	4.29136e-41
ENSG00000067842	-3.19362	5.14179e-18
ENSG00000173175	-3.22848	3.39681e-45
ENSG00000127334	-1.03944	1.16832e-15
ENSG00000187091	-2.03887	1.43033e-47
ENSG00000130829	3.32531	7.72297e-15
ENSG00000120885	-2.59841	2.8417e-37
ENSG00000081237	-1.2865	2.36659e-11
ENSG00000175175	-1.21057	4.14039e-07
ENSG00000197535	-1.03221	9.66182e-15
ENSG00000146731	1.11144	5.98277e-44
ENSG00000166869	-4.51469	1.61083e-40
ENSG00000163017	-2.71623	1.05635e-13
ENSG00000115616	-2.52786	1.75973e-41
ENSG00000091831	-1.49961	3.12504e-15
ENSG00000072133	-2.32382	6.89098e-16
ENSG00000163637	-1.62458	1.69819e-18
ENSG00000125508	2.00722	2.87325e-19
ENSG00000118193	1.56784	1.50227e-18
ENSG00000100526	1.14359	7.39696e-15
ENSG00000162595	-1.19961	1.42902e-09
ENSG00000154889	-1.01412	5.53442e-33
ENSG00000090020	-1.43988	2.05653e-25
ENSG00000047936	-2.95961	2.79263e-25
ENSG00000137285	-1.59244	4.30859e-11
ENSG00000070886	1.72756	0.013266
ENSG00000133101	-1.66541	3.34738e-07
ENSG00000187446	-1.45765	1.15065e-51
ENSG00000180815	-1.20906	8.92324e-07
ENSG00000074370	-1.46363	3.13946e-16
ENSG00000175662	-1.12337	1.17662e-29
ENSG00000144031	-1.23124	5.20349e-08
ENSG00000138646	-1.07503	1.11735e-07
ENSG00000141497	1.15612	2.20092e-15
ENSG00000112655	1.92378	1.35718e-20
ENSG00000275379	1.81824	0.00332401
ENSG00000197153	2.07267	9.74633e-07
ENSG00000138641	-1.12094	8.83721e-25
ENSG00000150907	-1.00855	6.42484e-18
ENSG00000156052	-1.17126	9.02124e-19
ENSG00000156970	1.17129	9.77742e-13
ENSG00000101255	3.8288	5.45245e-138
ENSG00000100479	1.04383	7.08446e-14
ENSG00000118094	-1.30693	1.4805e-07
ENSG00000134070	1.36624	1.42006e-19
ENSG00000177453	-1.6844	1.99407e-19
ENSG00000198483	-1.71828	1.92914e-19
ENSG00000103569	2.83554	2.309e-18
ENSG00000103710	-1.14641	1.27136e-08
ENSG00000145362	-3.10362	4.22488e-68
ENSG00000168421	-1.15672	6.57112e-10
ENSG00000147889	2.33882	3.59828e-24
ENSG00000147883	-3.17181	8.82017e-64
ENSG00000146904	1.03726	2.23818e-17
ENSG00000197256	-1.27034	2.21215e-12
ENSG00000204219	-1.58648	2.16752e-21
ENSG00000062524	-2.01725	2.75663e-13
ENSG00000175592	3.25702	2.19575e-35
ENSG00000265972	-1.5567	3.47906e-20
ENSG00000030304	-4.19234	2.44822e-59
ENSG00000049759	-1.38283	9.56943e-39
ENSG00000172296	-1.50052	5.86022e-15
ENSG00000135333	-3.9183	8.09858e-46
ENSG00000100628	-2.56414	2.74526e-33
ENSG00000067141	-1.16003	1.15928e-23
ENSG00000156475	-2.27549	1.3852e-26
ENSG00000070759	-1.24539	9.68768e-35
ENSG00000152495	-1.78148	4.97464e-25
ENSG00000184465	1.14324	3.98741e-13
ENSG00000198208	1.29382	1.18099e-16
ENSG00000204740	1.00377	0.00392671
ENSG00000169302	-1.93072	2.32657e-14
ENSG00000204472	-1.19299	6.16392e-13
ENSG00000183049	-1.10438	6.08643e-11
ENSG00000162949	-1.97936	4.79908e-17
ENSG00000137757	-2.40676	4.77608e-26
ENSG00000173110	1.01838	5.11084e-09
ENSG00000105173	1.50467	7.01928e-32
ENSG00000183317	-1.25769	1.91374e-19
ENSG00000101144	2.71367	2.93956e-25
ENSG00000130475	1.4834	2.62573e-15
ENSG00000277586	-4.49867	6.03035e-49
ENSG00000165138	1.0318	6.54563e-23
ENSG00000071539	2.27129	3.5275e-75
ENSG00000134057	1.52972	1.84231e-26
ENSG00000101224	2.12729	1.44378e-70
ENSG00000276023	1.91776	2.93483e-44
ENSG00000187840	1.43427	2.06397e-29
ENSG00000130589	1.11231	2.51649e-15
ENSG00000112981	-1.32686	3.46274e-07
ENSG00000269313	-1.14879	1.05082e-10
ENSG00000005981	1.10161	0.00193332
ENSG00000004799	-3.2308	2.48269e-59
ENSG00000116455	1.43205	2.45659e-30
ENSG00000161996	1.6711	1.50722e-26
ENSG00000138193	-2.25025	1.51566e-71
ENSG00000130413	-2.12644	1.37394e-11
ENSG00000081189	-1.85009	9.44765e-41
ENSG00000105976	1.77473	1.62957e-41
ENSG00000157456	1.07241	2.68462e-19
ENSG00000151490	1.20436	9.22757e-06
ENSG00000134533	-2.08827	6.16718e-20
ENSG00000116783	-1.47278	0.000491159
ENSG00000117399	1.21655	1.28116e-18
ENSG00000230797	1.00217	7.45592e-11
ENSG00000164611	1.10655	1.07098e-16
ENSG00000186185	1.84643	8.03012e-35
ENSG00000172915	-2.41526	3.56965e-26
ENSG00000184937	4.92617	2.37484e-29
ENSG00000075884	-1.48351	5.92997e-24
ENSG00000264424	1.36856	0.00164553
ENSG00000161714	-1.59717	1.78833e-24
ENSG00000064666	1.24723	7.75271e-37
ENSG00000170390	-1.37238	4.59313e-19
ENSG00000135828	-1.38642	1.41863e-37
ENSG00000145386	1.13663	3.92698e-15
ENSG00000139567	-1.54176	1.30786e-22
ENSG00000172014	-2.16046	1.39706e-06
ENSG00000135406	-4.40161	6.34566e-71
ENSG00000124571	1.08544	7.75344e-39
ENSG00000135773	-1.94096	1.32921e-15
ENSG00000072195	-2.62307	7.0551e-20
ENSG00000149294	-3.04531	8.52176e-50
ENSG00000141314	-1.22261	1.58134e-06
ENSG00000178462	-2.9264	1.71304e-41
ENSG00000136826	-2.61168	1.82706e-55
ENSG00000179846	3.02716	2.90716e-27
ENSG00000166508	1.48791	5.62531e-37
ENSG00000183207	1.13676	6.91532e-16
ENSG00000162063	1.66213	4.1446e-42
ENSG00000162909	-1.14497	1.67186e-27
ENSG00000204394	1.12242	2.89377e-27
ENSG00000178363	1.9479	7.42379e-09
ENSG00000135409	-1.90604	9.10061e-08
ENSG00000075651	-1.16578	5.24434e-17
ENSG00000149591	-1.78867	1.68072e-10
ENSG00000111077	-1.01255	7.12269e-16
ENSG00000132436	1.06287	2.21703e-16
ENSG00000100784	-1.46108	2.03089e-22
ENSG00000104951	1.02446	1.73098e-07
ENSG00000135740	1.08822	1.22126e-11
ENSG00000070778	-1.47842	8.3523e-50
ENSG00000141404	-1.25835	9.92917e-17
ENSG00000115556	-1.13941	1.62445e-13
ENSG00000065357	-1.1228	8.23261e-16
ENSG00000260691	-1.09626	0.0133151
ENSG00000179674	-2.59882	3.57594e-45
ENSG00000163673	1.24612	2.20181e-13
ENSG00000215182	3.63076	1.10155e-24
ENSG00000183831	-1.9512	8.62271e-11
ENSG00000155980	-2.73766	5.5362e-35
ENSG00000079308	-2.17234	1.8542e-22
ENSG00000102230	-1.60338	4.12575e-07
ENSG00000116106	-1.43219	4.22292e-15
ENSG00000101199	1.218	7.865e-20
ENSG00000065923	1.14707	4.53467e-09
ENSG00000179314	-3.2031	8.60948e-41
ENSG00000185483	-1.74651	2.85287e-24
ENSG00000204179	-2.8831	7.43822e-14
ENSG00000168447	-4.56517	5.66298e-51
ENSG00000080031	-2.08205	4.64745e-58
ENSG00000122547	1.07168	8.37329e-13
ENSG00000168280	-2.4439	5.56023e-51
ENSG00000123612	-1.78265	2.69997e-20
ENSG00000066032	-2.44136	4.4031e-11
ENSG00000174776	-1.05126	0.0336628
ENSG00000167550	1.71518	7.21187e-36
ENSG00000196503	1.06818	0.000133547
ENSG00000125398	1.95774	6.23642e-43
ENSG00000126226	1.10643	1.90887e-30
ENSG00000165192	-2.69206	7.62753e-09
ENSG00000178568	-2.7236	6.87461e-14
ENSG00000022267	-2.92472	1.20858e-41
ENSG00000115687	1.04059	3.28812e-16
ENSG00000143776	-1.07788	5.67046e-19
ENSG00000105851	-1.83421	1.49323e-22
ENSG00000108830	-2.19904	3.89574e-17
ENSG00000182040	-1.59232	8.35295e-05
ENSG00000197892	-1.3034	8.43488e-21
ENSG00000123374	1.00421	8.9616e-27
ENSG00000073111	1.53686	9.64907e-29
ENSG00000069188	-1.01894	7.28853e-07
ENSG00000163497	-4.51494	6.40973e-55
ENSG00000175792	1.46132	2.4806e-49
ENSG00000258947	1.60584	2.66408e-13
ENSG00000198771	-1.74509	1.08414e-39
ENSG00000131153	1.17915	1.53137e-19
ENSG00000140859	1.33081	3.93686e-15
ENSG00000196169	-1.49926	2.47356e-08
ENSG00000072163	-1.78961	6.13913e-12
ENSG00000145349	-1.02459	2.13457e-18
ENSG00000139725	-1.5131	2.70634e-19
ENSG00000163681	-1.05616	4.96822e-14
ENSG00000088992	4.00264	9.54944e-70
ENSG00000175084	-3.60291	5.75744e-19
ENSG00000104738	1.10689	9.13717e-23
ENSG00000126602	1.48176	7.07393e-36
ENSG00000144381	1.09235	3.09919e-22
ENSG00000112425	-1.12003	1.59489e-10
ENSG00000151229	-1.95759	1.56451e-34
ENSG00000162409	-3.18393	3.03753e-25
ENSG00000174373	-1.05727	5.60861e-15
ENSG00000120899	-1.1019	1.66725e-19
ENSG00000140416	-1.00174	3.71992e-08
ENSG00000164076	3.02705	3.11044e-16
ENSG00000120694	1.16049	3.3788e-11
ENSG00000127955	-1.59149	1.26424e-30
ENSG00000106683	1.03914	3.83514e-21
ENSG00000176619	1.27826	6.888e-26
ENSG00000204366	1.50156	2.76105e-19
ENSG00000138395	-1.90418	2.79598e-13
ENSG00000135632	1.0966	1.40066e-30
ENSG00000113263	-1.19928	1.92512e-10
ENSG00000164512	-1.37743	3.26906e-07
ENSG00000179094	-1.24764	2.32956e-14
ENSG00000213889	1.39773	6.5392e-13
ENSG00000126787	1.02479	2.80488e-09
ENSG00000152642	-1.54482	1.48397e-61
ENSG00000180209	1.22829	1.44553e-05
ENSG00000169271	-4.12365	4.6563e-24
ENSG00000161405	-1.56573	2.03788e-12
ENSG00000196411	1.43325	1.31179e-37
ENSG00000135446	1.42929	5.22787e-41
ENSG00000149599	1.36984	1.86461e-08
ENSG00000180071	1.18045	9.41575e-11
ENSG00000112874	-1.27581	2.46034e-11
ENSG00000164122	-4.92119	7.08829e-25
ENSG00000176601	-1.43847	0.000135357
ENSG00000113790	-1.36612	1.8675e-26
ENSG00000080224	-3.94151	1.76117e-20
ENSG00000244405	1.10923	2.9107e-11
ENSG00000175832	5.34667	1.28482e-168
ENSG00000158402	1.18877	5.22039e-26
ENSG00000161896	-1.29962	1.09786e-07
ENSG00000087077	1.32793	3.25919e-18
ENSG00000111249	-2.92539	4.22911e-20
ENSG00000095585	-1.00464	1.66675e-10
ENSG00000002746	1.21718	4.1577e-08
ENSG00000104312	1.42095	2.50984e-45
ENSG00000180543	-1.49454	1.70239e-18
ENSG00000182472	1.44417	2.49576e-10
ENSG00000010671	-1.56463	6.24944e-17
ENSG00000075035	-3.05667	7.57798e-22
ENSG00000164045	1.16474	1.33496e-17
ENSG00000198467	-1.3081	2.94627e-06
ENSG00000115896	-1.20967	2.9111e-15
ENSG00000153233	-2.20301	8.99408e-20
ENSG00000148798	-3.63855	4.03544e-45
ENSG00000133392	-4.13842	2.26004e-36
ENSG00000167291	1.21622	5.60584e-27
ENSG00000155961	-1.93314	8.57081e-24
ENSG00000130822	-2.27826	9.88208e-09
ENSG00000101210	-2.40614	1.22759e-18
ENSG00000213923	1.05715	1.7191e-25
ENSG00000180251	-1.49803	9.1052e-05
ENSG00000135476	1.13848	7.43905e-20
ENSG00000230667	2.14822	7.34825e-13
ENSG00000082175	-2.68268	2.64082e-31
ENSG00000116741	-1.74317	1.109e-20
ENSG00000166226	1.0599	1.60505e-24
ENSG00000183010	1.92576	7.27515e-39
ENSG00000170579	-1.44676	6.63659e-08
ENSG00000139269	1.18177	1.67394e-09
ENSG00000166963	-1.14189	5.81318e-08
ENSG00000187323	-1.01644	0.000132005
ENSG00000185532	-1.28437	2.29143e-14
ENSG00000169418	-1.55723	6.96115e-16
ENSG00000075239	-1.3691	3.80483e-57
ENSG00000165269	-1.99378	4.18981e-20
ENSG00000048052	-2.15877	9.56384e-35
ENSG00000007264	-1.24229	4.93438e-12
ENSG00000182263	-1.95468	5.65048e-23
ENSG00000172216	1.33814	5.86313e-22
ENSG00000167601	-1.01865	1.07219e-12
ENSG00000005513	-1.49022	2.92039e-07
ENSG00000058404	-1.76309	6.59304e-10
ENSG00000139890	1.38369	2.30758e-15
ENSG00000143256	1.08538	4.62854e-18
ENSG00000177732	1.27072	4.43273e-13
ENSG00000152214	-2.21234	0.0311741
ENSG00000078295	-1.48027	7.29111e-10
ENSG00000124766	1.4798	6.94214e-36
ENSG00000156381	-1.15299	2.27702e-20
ENSG00000164038	1.05405	9.93985e-13
ENSG00000140538	-2.92724	1.31755e-30
ENSG00000230453	1.58051	0.000107352
ENSG00000259916	-1.57718	0.00313729
ENSG00000164694	1.04993	6.07129e-06
ENSG00000104722	-3.70927	8.2688e-41
ENSG00000129194	-1.35889	3.25129e-10
ENSG00000093009	1.84821	8.27341e-31
ENSG00000197776	-1.29121	1.03152e-17
ENSG00000106278	-4.17319	8.48761e-39
ENSG00000078900	2.10869	1.30203e-25
ENSG00000142875	-2.49511	4.65426e-46
ENSG00000175602	1.52265	1.74144e-21
ENSG00000106123	-1.33949	1.98365e-11
ENSG00000138029	-1.01238	1.72677e-69
ENSG00000146909	1.01305	3.19056e-37
ENSG00000066230	-4.00612	2.50405e-29
ENSG00000198721	-1.58151	5.03115e-34
ENSG00000170160	-1.25844	0.000307849
ENSG00000170276	-1.55113	9.5296e-11
ENSG00000188176	1.03201	0.000561994
ENSG00000088280	-1.86458	3.89825e-57
ENSG00000055813	-1.72805	7.57264e-12
ENSG00000092445	1.99874	2.21278e-22
ENSG00000232040	-1.20695	0.000165015
ENSG00000121621	1.30851	2.72707e-18
ENSG00000125845	-1.93375	5.12896e-31
ENSG00000148677	1.80748	0.00146904
ENSG00000079335	-1.92317	5.19256e-30
ENSG00000008323	-1.01264	2.44353e-14
ENSG00000197168	1.42884	1.5532e-19
ENSG00000171094	-3.30877	1.99853e-27
ENSG00000165338	-1.12661	2.62947e-16
ENSG00000162458	-1.25084	1.33168e-43
ENSG00000158458	-3.30868	2.7598e-31
ENSG00000158517	-1.41963	6.63057e-13
ENSG00000081026	-1.28658	1.34363e-29
ENSG00000109063	-1.04861	2.04043e-10
ENSG00000101349	-2.52546	2.63666e-06
ENSG00000135083	-1.65744	5.83078e-18
ENSG00000112214	-1.4593	2.78871e-13
ENSG00000026508	1.26838	1.97605e-28
ENSG00000101558	-1.07046	5.92229e-23
ENSG00000088256	-1.59236	1.74942e-52
ENSG00000100485	-1.24504	3.18366e-25
ENSG00000112851	-1.00912	4.70332e-11
ENSG00000060656	1.12028	1.6703e-06
ENSG00000129474	2.98871	5.42331e-149
ENSG00000110693	-1.20725	4.22782e-10
ENSG00000113389	-1.73291	9.12331e-09
ENSG00000104833	-3.62729	1.57261e-39
ENSG00000196090	-1.87899	4.95976e-12
ENSG00000162104	-1.28067	2.4255e-25
ENSG00000184672	-3.84468	8.11866e-19
ENSG00000120875	2.50792	4.74008e-21
ENSG00000118492	-1.56684	6.20096e-07
ENSG00000168496	1.06823	2.09184e-20
ENSG00000157087	-2.5499	2.76853e-17
ENSG00000138764	-1.08239	2.39549e-16
ENSG00000154548	-1.22128	1.84559e-06
ENSG00000100302	-2.12893	2.44815e-29
ENSG00000101049	-2.01609	1.00962e-19
ENSG00000112118	1.12539	6.48681e-31
ENSG00000145242	-3.36539	1.06995e-17
ENSG00000154822	-2.5464	1.46647e-38
ENSG00000007237	-1.51803	4.71818e-21
ENSG00000181626	-1.62634	0.000415919
ENSG00000115593	-3.19996	4.83342e-10
ENSG00000175063	1.99488	1.38268e-48
ENSG00000116473	-1.25298	3.41124e-31
ENSG00000259030	-1.51759	1.63139e-10
ENSG00000259371	-1.65162	5.58783e-06
ENSG00000138669	-3.90952	2.94791e-58
ENSG00000142627	1.00965	4.22283e-08
ENSG00000085840	1.05584	4.84489e-13
ENSG00000160396	-1.86281	5.68577e-09
ENSG00000164749	-1.03225	1.0999e-09
ENSG00000130176	-2.93818	2.6249e-17
ENSG00000106351	-1.07591	2.98211e-18
ENSG00000125378	1.68082	1.50739e-21
ENSG00000180787	-1.47368	1.221e-20
ENSG00000270885	1.81941	6.46792e-10
ENSG00000165304	1.43808	4.62154e-21
ENSG00000120129	-1.32391	8.96283e-19
ENSG00000152953	-1.53306	2.40246e-17
ENSG00000135299	-1.10476	2.65608e-12
ENSG00000133083	-2.9876	5.61458e-45
ENSG00000154654	-1.46053	2.28684e-09
ENSG00000158050	1.34509	1.24414e-14
ENSG00000106484	1.04236	4.5941e-22
ENSG00000123131	1.40692	1.49284e-28
ENSG00000160949	1.29683	2.29339e-26
ENSG00000189037	-3.01003	6.25429e-08
ENSG00000095303	-2.26722	1.69582e-38
ENSG00000101945	1.27137	6.23586e-25
ENSG00000198842	2.97434	1.11669e-11
ENSG00000165023	-3.17819	8.57087e-23
ENSG00000104321	-1.47693	6.21095e-12
ENSG00000171777	-1.3508	6.98759e-15
ENSG00000198947	-2.11774	6.78871e-19
ENSG00000150672	-1.71378	3.27309e-21
ENSG00000185420	1.01114	7.66243e-25
ENSG00000133878	-2.78016	3.77213e-29
ENSG00000070961	-1.09607	1.66495e-15
ENSG00000040199	-2.59661	1.61504e-44
ENSG00000117983	-1.07937	0.0024805
ENSG00000111404	-5.31664	5.65386e-63
ENSG00000139144	-3.62681	5.64366e-18
ENSG00000148053	-2.1788	3.67653e-17
ENSG00000044524	-1.13667	6.92747e-09
ENSG00000100285	-2.02974	2.83529e-24
ENSG00000197905	2.40081	1.14232e-103
ENSG00000120063	-1.1188	3.84242e-27
ENSG00000181449	-1.944	2.9955e-07
ENSG00000170500	-4.27609	4.96836e-44
ENSG00000187391	-1.4499	1.22109e-29
ENSG00000096384	1.03005	4.28796e-57
ENSG00000171858	1.39008	4.57775e-14
ENSG00000087258	-3.03971	2.04011e-37
ENSG00000151150	-1.9428	7.69828e-42
ENSG00000140009	-1.41155	4.8342e-12
ENSG00000117592	-1.47982	1.6648e-49
ENSG00000078053	-1.01702	5.78024e-07
ENSG00000125740	-1.2784	4.36972e-05
ENSG00000176170	1.75814	7.18688e-21
ENSG00000142515	-1.85399	5.06038e-11
ENSG00000136960	-1.55892	4.09262e-36
ENSG00000012504	-4.52965	2.7504e-38
ENSG00000106089	1.92725	2.40942e-31
ENSG00000186416	1.15879	2.20401e-33
ENSG00000018625	-4.9101	2.17004e-44
ENSG00000162676	-1.10321	1.45865e-06
ENSG00000182901	-1.76087	3.42157e-05
ENSG00000011465	-1.80124	4.63751e-22
ENSG00000129667	1.49518	4.09785e-26
ENSG00000141639	-4.41238	1.75869e-38
ENSG00000163884	-1.1941	1.25883e-07
ENSG00000111364	1.01155	3.60437e-41
ENSG00000177455	-1.92185	9.89739e-12
ENSG00000158865	-2.88222	7.14381e-17
ENSG00000163931	1.14504	2.47831e-32
ENSG00000060140	-1.85798	6.53514e-25
ENSG00000072415	-1.01744	1.01428e-18
ENSG00000151012	2.28204	5.11412e-26
ENSG00000084774	1.51845	8.39115e-33
ENSG00000168229	-3.7205	1.53119e-43
ENSG00000198821	-1.14648	3.64484e-11
ENSG00000158022	-1.79309	1.25678e-07
ENSG00000102349	-1.35863	2.19819e-19
ENSG00000180353	-1.23435	1.77224e-16
ENSG00000112578	1.584	3.50878e-60
ENSG00000142945	1.42879	1.92028e-31
ENSG00000159387	-2.98684	7.66376e-10
ENSG00000171791	-1.7638	1.86417e-33
ENSG00000182578	-1.05357	4.11363e-10
ENSG00000182199	1.50252	3.75891e-46
ENSG00000128591	-1.84779	3.88016e-11
ENSG00000148335	1.32502	1.49787e-40
ENSG00000156466	-1.68011	4.4808e-10
ENSG00000169432	-3.75444	6.30722e-67
ENSG00000126457	1.39944	8.13623e-16
ENSG00000101335	-2.16114	3.44837e-15
ENSG00000178573	-1.56989	2.1453e-18
ENSG00000155511	-2.62354	1.21636e-18
ENSG00000157168	-1.72683	4.85214e-15
ENSG00000134853	-1.32484	1.91557e-17
ENSG00000180432	-2.14097	2.74492e-11
ENSG00000029559	6.04384	3.50745e-38
ENSG00000144821	-2.2033	7.7306e-31
ENSG00000143171	-4.39131	3.35159e-67
ENSG00000136997	1.95401	1.04727e-36
ENSG00000163507	1.17846	1.70586e-15
ENSG00000118922	-1.07322	1.03613e-11
ENSG00000019186	2.27418	1.89366e-06
ENSG00000074181	1.57614	3.18066e-16
ENSG00000172164	2.09399	1.02432e-59
ENSG00000110090	-1.33084	6.98144e-35
ENSG00000182759	-2.16883	5.27358e-11
ENSG00000133687	-1.67923	6.18648e-25
ENSG00000157404	-2.38314	1.96894e-44
ENSG00000160868	-2.82929	6.13254e-15
ENSG00000073861	-1.24495	6.28363e-10
ENSG00000117394	1.55013	1.05015e-22
ENSG00000125798	1.86663	2.29824e-23
ENSG00000218891	1.09788	4.23161e-13
ENSG00000126803	-1.59685	9.84127e-14
ENSG00000161298	-1.0034	5.39613e-07
ENSG00000120915	-1.56583	6.4223e-27
ENSG00000134376	-1.90485	3.17137e-07
ENSG00000104524	1.71801	2.40604e-31
ENSG00000118777	-4.83279	6.93933e-89
ENSG00000165731	-1.62781	2.47668e-09
ENSG00000122641	5.17599	9.61293e-131
ENSG00000135363	-1.32186	1.37649e-31
ENSG00000182492	2.4656	1.18905e-35
ENSG00000152977	-3.49014	9.12565e-15
ENSG00000184349	-1.68097	3.05677e-19
ENSG00000196724	-1.71733	1.20958e-16
ENSG00000184916	1.78736	2.33488e-21
ENSG00000144891	-4.458	1.46776e-42
ENSG00000106571	-1.62666	3.85278e-16
ENSG00000072571	1.15171	1.12074e-09
ENSG00000068650	2.12384	1.84191e-38
ENSG00000189120	1.3426	4.61364e-10
ENSG00000105610	1.15061	0.000162514
ENSG00000135625	1.98309	7.09928e-08
ENSG00000109458	-1.25278	1.8862e-36
ENSG00000144426	-1.67784	2.73739e-33
ENSG00000196793	1.65418	3.24889e-20
ENSG00000111245	-1.91604	2.76151e-05
ENSG00000131910	2.1137	5.65452e-13
ENSG00000144834	-3.83478	3.11827e-26
ENSG00000152467	-1.71411	3.21497e-05
ENSG00000073282	-1.00637	9.22907e-05
ENSG00000133800	-4.17756	2.2498e-94
ENSG00000116141	-1.19992	1.51468e-07
ENSG00000176293	-1.81516	1.77431e-24
ENSG00000177238	2.27786	2.08985e-09
ENSG00000077782	-1.04772	2.86548e-10
ENSG00000240583	-1.02156	5.04068e-12
ENSG00000120254	2.44557	5.24486e-106
ENSG00000128564	1.66317	9.67425e-12
ENSG00000130561	-1.14326	0.000307131
ENSG00000139626	-1.20651	2.66819e-11
ENSG00000143603	-1.9397	2.96147e-35
ENSG00000141086	1.19658	0.00593976
ENSG00000139292	2.35511	5.46024e-21
ENSG00000129514	-1.3277	4.31398e-09
ENSG00000120251	-2.19369	7.03143e-08
ENSG00000169083	-1.81534	2.31226e-14
ENSG00000131711	-1.51187	2.65785e-14
ENSG00000253506	2.18249	1.1022e-13
ENSG00000196345	-1.10432	3.39273e-08
ENSG00000167880	1.49765	2.34964e-19
ENSG00000163041	-1.10439	1.42341e-08
ENSG00000064300	-2.3725	1.28848e-21
ENSG00000160867	1.16765	1.64996e-10
ENSG00000160808	-1.64794	4.2186e-06
ENSG00000172137	-3.05575	4.14802e-34
ENSG00000140675	1.3765	8.60763e-11
ENSG00000150681	-1.29509	8.98573e-15
ENSG00000090104	-1.07023	5.0379e-09
ENSG00000127074	-3.29878	1.21764e-34
ENSG00000152137	-2.90656	2.34476e-26
ENSG00000160796	1.29998	2.80799e-17
ENSG00000079739	-1.52454	1.54821e-49
ENSG00000123999	1.66775	0.000371853
ENSG00000100362	-1.14734	0.00186612
ENSG00000110092	1.62335	2.9652e-66
ENSG00000120659	1.54604	2.9275e-10
ENSG00000138772	1.3908	3.37083e-14
ENSG00000086991	3.23596	1.79455e-39
ENSG00000075673	-1.87868	7.6137e-05
ENSG00000171885	-2.69592	6.36767e-11
ENSG00000257335	-1.97735	8.56457e-12
ENSG00000099194	2.48498	2.05869e-37
ENSG00000165092	-1.88349	2.06764e-14
ENSG00000164818	1.11632	3.80272e-29
ENSG00000146555	-1.21049	6.86718e-11
ENSG00000180198	1.13707	8.4635e-24
ENSG00000181856	-1.99691	6.38533e-19
ENSG00000109906	-3.67281	1.29824e-43
ENSG00000196092	-2.74608	1.03738e-12
ENSG00000240972	1.36685	5.70311e-15
ENSG00000119922	-1.01199	4.11773e-08
ENSG00000185745	-1.41672	1.18047e-10
ENSG00000273079	3.02688	4.37349e-39
ENSG00000275126	8.95641	0.00212189
ENSG00000143590	1.48496	7.33715e-23
ENSG00000171956	1.27366	0.0325864
ENSG00000105409	-1.39686	1.21411e-07
ENSG00000198785	-2.09775	1.78162e-28
ENSG00000151846	1.62565	1.1336e-14
ENSG00000136267	-2.47173	3.4656e-13
ENSG00000113580	-1.93565	1.46567e-48
ENSG00000113594	-3.45773	1.69374e-77
ENSG00000089199	-3.66441	4.73417e-40
ENSG00000066468	-2.45895	3.78559e-41
ENSG00000180176	2.85865	5.30987e-18
ENSG00000099977	-1.13205	4.99776e-15
ENSG00000108773	1.45797	1.01421e-61
ENSG00000198087	-1.05317	2.9461e-08
ENSG00000163083	1.39106	2.72844e-08
ENSG00000137869	1.31581	5.48549e-07
ENSG00000004846	-3.97972	9.8043e-25
ENSG00000145335	-1.87602	3.40118e-19
ENSG00000164651	7.71208	1.22456e-23
ENSG00000122194	-1.92986	0.00173159
ENSG00000115705	-1.89577	7.1383e-13
ENSG00000109846	-2.11582	1.70911e-18
ENSG00000004776	-3.16132	6.05984e-25
ENSG00000184058	-1.33081	3.33876e-09
ENSG00000196437	-1.19259	1.89119e-10
ENSG00000138180	1.48055	5.23767e-20
ENSG00000106829	-1.10525	1.06395e-25
ENSG00000085563	-2.1479	1.578e-18
ENSG00000138061	-1.21005	1.50318e-06
ENSG00000197561	-3.26467	2.23406e-32
ENSG00000278637	1.86984	0.000679588
ENSG00000278705	2.6843	1.32473e-08
ENSG00000278463	2.49916	1.37012e-05
ENSG00000165029	-1.13633	5.36002e-13
ENSG00000197061	1.29401	0.00236896
ENSG00000130513	3.15601	9.21952e-35
ENSG00000133627	1.35182	8.56208e-40
ENSG00000133454	1.30813	0.00150731
ENSG00000122034	1.61687	1.15908e-38
ENSG00000116017	1.7948	6.97145e-26
ENSG00000185345	-1.42416	1.27043e-18
ENSG00000119138	-2.13058	2.3969e-62
ENSG00000134215	-1.03702	1.22237e-05
ENSG00000136167	-1.03817	1.83948e-09
ENSG00000120156	-1.24537	1.15729e-16
ENSG00000277157	1.23262	0.00136179
ENSG00000092009	-4.55245	7.11849e-50
ENSG00000125965	-1.24645	0.0150657
ENSG00000100448	-3.61664	3.8628e-46
ENSG00000276966	1.16781	0.000144153
ENSG00000100453	2.00093	3.07276e-15
ENSG00000274618	-2.8274	5.80021e-05
ENSG00000166825	-4.64795	8.97965e-55
ENSG00000129167	-4.26609	2.57151e-56
ENSG00000072694	-1.32485	1.92783e-10
ENSG00000105974	-1.54547	4.67504e-16
ENSG00000147955	1.28573	1.80202e-24
ENSG00000073712	-1.28325	5.50688e-11
ENSG00000123405	1.02084	2.11264e-05
ENSG00000116032	1.37927	2.18636e-06
ENSG00000071564	1.0451	1.16068e-22
ENSG00000182732	-1.63395	1.18095e-10
ENSG00000171989	-1.36561	1.37251e-05
ENSG00000152578	-3.29825	1.36009e-29
ENSG00000151623	-3.05529	1.19696e-63
ENSG00000198300	-2.78621	7.34579e-33
ENSG00000152785	-5.91706	5.77361e-98
ENSG00000169679	1.4116	1.35094e-20
ENSG00000151914	-1.25688	6.64154e-16
ENSG00000183091	1.97465	5.30372e-15
ENSG00000111206	1.34248	1.34576e-24
ENSG00000104899	3.17259	2.18125e-25
ENSG00000129521	-1.02994	1.21677e-07
ENSG00000141756	1.91061	1.99749e-25
ENSG00000125414	-1.879	0.00298021
ENSG00000106462	1.3731	8.20574e-36
ENSG00000103222	1.0609	2.88683e-18
ENSG00000153094	-1.07582	2.78109e-15
ENSG00000143333	2.1839	3.11567e-41
ENSG00000006071	-2.38228	1.10602e-19
ENSG00000161798	2.65158	1.36414e-10
ENSG00000124212	-1.64663	1.06074e-11
ENSG00000255974	-1.24823	0.00119278
ENSG00000075142	-1.51671	5.21447e-37
ENSG00000156030	-1.07847	3.74635e-27
ENSG00000108852	-1.87881	4.03375e-19
ENSG00000122861	2.03147	2.26025e-37
ENSG00000049768	1.53815	2.43352e-15
ENSG00000105464	4.98379	1.24857e-114
ENSG00000143344	-1.36427	2.37672e-24
ENSG00000183856	2.0607	4.07404e-44
ENSG00000155324	-1.77064	1.70034e-47
ENSG00000113448	-1.48812	2.79845e-16
ENSG00000174123	-2.40282	1.46563e-20
ENSG00000185811	-1.62524	5.4839e-21
ENSG00000154310	-1.12044	1.64881e-09
ENSG00000164442	-1.59707	4.40633e-43
ENSG00000150337	1.29498	2.06415e-08
ENSG00000102145	-1.05511	0.00010373
ENSG00000183598	1.23949	0.00592432
ENSG00000124216	1.89247	1.57158e-28
ENSG00000064651	1.34868	2.40902e-27
ENSG00000134323	1.35192	3.59463e-08
ENSG00000164619	-1.63473	3.84075e-11
ENSG00000141837	-1.53347	2.70193e-15
ENSG00000122367	-3.65712	6.36785e-36
ENSG00000204389	-1.18201	1.52455e-08
ENSG00000007350	-1.30125	6.82311e-06
ENSG00000122025	-1.98206	2.85692e-18
ENSG00000153162	-2.01843	1.49159e-34
ENSG00000077080	-3.10736	2.67478e-15
ENSG00000136011	-2.18323	1.40931e-29
ENSG00000141968	-1.04924	3.77593e-11
ENSG00000084207	1.08963	1.20749e-15
ENSG00000135480	2.96875	3.25694e-34
ENSG00000173267	-1.99487	1.29033e-15
ENSG00000120149	4.49743	3.87973e-73
ENSG00000145703	-2.14694	1.55738e-29
ENSG00000180210	2.4345	1.63561e-08
ENSG00000101057	2.15703	9.64214e-50
ENSG00000106070	1.02995	5.89966e-14
ENSG00000116661	1.02248	0.000219023
ENSG00000171848	1.5871	7.67648e-23
ENSG00000112175	-3.24195	5.87335e-40
ENSG00000101665	-1.0501	1.89655e-16
ENSG00000167996	-1.03943	6.90047e-17
ENSG00000196924	-1.03592	4.8171e-05
ENSG00000114166	-1.86445	9.13999e-31
ENSG00000012048	1.10293	4.37811e-16
ENSG00000166828	-4.34066	3.15656e-28
ENSG00000139514	1.1569	3.4337e-24
ENSG00000138379	-1.97482	7.43219e-14
ENSG00000099901	1.01788	2.48714e-27
ENSG00000151090	-2.64117	1.32671e-38
ENSG00000101440	1.03036	0.00274342
ENSG00000126583	2.40947	4.92176e-12
ENSG00000183454	-3.76787	6.36163e-33
ENSG00000168646	1.93749	6.84905e-21
ENSG00000169946	-1.36748	3.29538e-14
ENSG00000153822	-2.49931	3.9698e-10
ENSG00000188536	-2.51109	2.1341e-25
ENSG00000086506	2.24723	2.82849e-05
ENSG00000062038	6.60195	5.05183e-196
ENSG00000129673	1.43421	4.5479e-06
ENSG00000023445	-1.25218	1.71754e-09
ENSG00000067840	-3.23398	8.14506e-49
ENSG00000198049	-3.42055	1.35222e-21
ENSG00000135114	-1.36866	1.58773e-09
ENSG00000157388	1.25578	2.1155e-16
ENSG00000102245	-1.71522	3.89697e-19
ENSG00000107242	-1.10376	2.77789e-18
ENSG00000158258	-1.47403	1.30352e-10
ENSG00000197769	-1.62285	5.07135e-07
ENSG00000172349	-1.75383	3.77261e-25
ENSG00000141655	-1.25564	5.23373e-14
ENSG00000177508	2.40088	1.3684e-11
ENSG00000167916	-7.67943	1.27252e-64
ENSG00000036828	-3.87207	2.01478e-21
ENSG00000187242	-1.80309	7.19886e-11
ENSG00000171401	1.38626	0.00243899
ENSG00000171346	1.54862	9.94874e-16
ENSG00000171403	-3.46615	1.77229e-22
ENSG00000178562	-1.17773	2.24215e-09
ENSG00000173208	-2.32638	2.73643e-30
ENSG00000158828	-1.42214	1.21616e-53
ENSG00000186310	-2.24308	9.66126e-24
ENSG00000161133	2.12166	2.32939e-07
ENSG00000172867	-1.243	0.00142812
ENSG00000167768	-2.62178	1.17438e-22
ENSG00000186462	-3.88978	4.47594e-86
ENSG00000226650	2.20213	1.38084e-08
ENSG00000204086	1.14633	6.35318e-05
ENSG00000089685	1.52261	3.27559e-29
ENSG00000137875	-1.29157	1.78079e-07
ENSG00000243649	1.03495	1.55126e-07
ENSG00000102981	1.15671	3.52892e-12
ENSG00000150627	-3.02742	1.07278e-28
ENSG00000131981	-1.33091	6.34563e-27
ENSG00000171049	1.04494	8.1784e-05
ENSG00000112232	-4.75127	1.70072e-36
ENSG00000162998	-1.3615	7.93653e-11
ENSG00000106331	-1.90027	2.06437e-05
ENSG00000173578	-1.82883	1.55169e-18
ENSG00000203690	-1.4663	1.00694e-05
ENSG00000121807	-2.0197	1.14222e-27
ENSG00000101204	-1.77529	0.00257423
ENSG00000141385	-1.03816	5.70345e-35
ENSG00000132341	1.11482	1.00153e-24
ENSG00000171747	-1.86127	5.25255e-54
ENSG00000164627	-1.90823	2.9149e-13
ENSG00000148357	-2.2267	1.3165e-25
ENSG00000169306	-2.64538	8.01059e-10
ENSG00000164867	1.23121	1.34512e-11
ENSG00000167315	-1.8525	2.36787e-48
ENSG00000157551	1.7872	2.57189e-12
ENSG00000082512	1.28542	2.94652e-25
ENSG00000173621	1.16561	2.29866e-14
ENSG00000196460	2.43576	6.59163e-19
ENSG00000185002	-2.25617	1.61331e-11
ENSG00000165966	-3.92644	1.43646e-32
ENSG00000119782	-1.82852	2.09875e-24
ENSG00000172456	1.22937	1.50352e-08
ENSG00000087586	1.35762	4.51345e-24
ENSG00000133731	-1.3195	2.51214e-20
ENSG00000148734	2.79453	7.47354e-32
ENSG00000172731	1.05073	7.38692e-16
ENSG00000136160	-1.46483	3.66636e-27
ENSG00000138435	-1.69102	6.37338e-12
ENSG00000167207	1.28169	2.89155e-13
ENSG00000159433	-1.00744	3.6601e-10
ENSG00000184144	-4.71161	9.93774e-52
ENSG00000112964	-2.58858	4.49352e-40
ENSG00000100721	-3.5018	7.51824e-14
ENSG00000148408	-2.57881	3.22421e-14
ENSG00000065534	-2.73191	2.9391e-31
ENSG00000156802	1.39797	4.21048e-17
ENSG00000100739	-2.00016	1.83252e-31
ENSG00000165685	1.56019	7.01199e-11
ENSG00000166123	1.63656	2.7282e-35
ENSG00000089250	-2.7763	2.41098e-14
ENSG00000164047	-1.58639	2.84048e-06
ENSG00000114270	2.83444	3.30204e-51
ENSG00000137807	1.37544	1.77693e-23
ENSG00000166851	1.66529	1.19584e-34
ENSG00000141527	2.02705	1.2207e-25
ENSG00000198851	-1.33279	7.98346e-15
ENSG00000169067	1.76449	0.00900882
ENSG00000156804	-1.81551	2.99041e-24
ENSG00000141570	1.72679	2.13839e-53
ENSG00000130294	-4.20217	5.89594e-46
ENSG00000185155	-2.27698	1.77349e-14
ENSG00000162728	-1.58391	8.71958e-07
ENSG00000107954	-1.58208	4.17073e-11
ENSG00000165732	1.10943	9.8911e-21
ENSG00000090889	1.43988	7.03938e-26
ENSG00000115165	-1.02454	7.80262e-08
ENSG00000154611	-2.26833	3.78e-05
ENSG00000149305	-2.4748	0.00203717
ENSG00000142319	1.53497	0.000621956
ENSG00000206557	2.54649	7.84952e-05
ENSG00000138798	-1.95477	1.73398e-11
ENSG00000132646	1.1732	2.30273e-19
ENSG00000169218	-2.67768	2.52655e-22
ENSG00000166736	-3.61613	1.34598e-34
ENSG00000122420	-1.30154	3.17986e-10
ENSG00000166091	-4.83014	3.50385e-38
ENSG00000183741	-1.05376	2.13462e-11
ENSG00000197632	2.16111	5.83342e-07
ENSG00000074755	-1.68215	4.37891e-54
ENSG00000112186	-1.67969	7.5902e-16
ENSG00000100351	-1.16934	1.06569e-13
ENSG00000251537	1.43224	0.00281802
ENSG00000125337	1.18635	7.30719e-05
ENSG00000104043	-1.19613	3.27937e-15
ENSG00000263353	1.38631	0.00415413
ENSG00000172005	-3.82561	3.33463e-69
ENSG00000152804	-1.08371	3.2893e-13
ENSG00000102468	-1.06445	8.21637e-06
ENSG00000115268	1.02807	1.02672e-13
ENSG00000137699	4.20706	8.49931e-87
ENSG00000244734	-2.79086	2.9357e-32
ENSG00000185245	-1.26236	8.18217e-11
ENSG00000198010	-2.30124	6.84088e-14
ENSG00000165188	3.15348	2.63076e-58
ENSG00000132970	-1.37156	1.69998e-10
ENSG00000198121	-2.23454	6.0921e-65
ENSG00000093072	-1.56644	1.53275e-21
ENSG00000079689	-5.38865	1.41727e-102
ENSG00000152034	-2.80627	4.29448e-05
ENSG00000185838	1.5941	1.17079e-32
ENSG00000165553	-5.31834	2.53312e-31
ENSG00000115295	-2.06225	7.65127e-32
ENSG00000136144	1.0885	7.05704e-31
ENSG00000185988	2.14076	1.98705e-07
ENSG00000100014	-1.0574	3.36466e-30
ENSG00000197444	-2.16215	6.91921e-11
ENSG00000115041	-1.61476	1.91765e-12
ENSG00000170214	-2.12859	6.29636e-19
ENSG00000187144	1.43207	0.020536
ENSG00000138622	-1.7117	1.03261e-07
ENSG00000197766	-2.80386	1.27221e-37
ENSG00000165072	-5.08143	2.55208e-87
ENSG00000187486	1.4986	1.88657e-14
ENSG00000111859	-1.00718	1.23896e-13
ENSG00000172238	-1.79279	8.14681e-11
ENSG00000186832	5.10167	2.19591e-27
ENSG00000100726	1.05326	1.3643e-24
ENSG00000127951	-2.67217	2.08776e-89
ENSG00000128422	4.71315	3.9361e-37
ENSG00000180914	2.5627	4.11333e-60
ENSG00000164418	-1.94719	7.82492e-18
ENSG00000170296	-1.6181	4.89516e-16
ENSG00000151617	1.4921	2.14495e-20
ENSG00000170191	1.23764	2.29996e-25
ENSG00000164588	1.12781	0.00503255
ENSG00000171517	-1.59576	2.16464e-09
ENSG00000237649	1.30606	2.4372e-28
ENSG00000080644	-2.3215	4.29089e-24
ENSG00000139055	1.78389	1.79606e-11
ENSG00000117971	-1.06262	4.49178e-05
ENSG00000213903	1.16935	1.32181e-10
ENSG00000136274	-2.00187	1.44337e-24
ENSG00000198125	-2.38025	5.27148e-23
ENSG00000183166	-1.2454	0.005873
ENSG00000126759	-1.59964	1.65297e-21
ENSG00000107165	-1.24181	1.13992e-05
ENSG00000088727	1.04992	1.14235e-18
ENSG00000116014	2.10066	6.4456e-07
ENSG00000169174	3.40217	1.00858e-41
ENSG00000116852	1.06564	8.64572e-10
ENSG00000089558	1.53801	7.2047e-11
ENSG00000148702	3.42486	1.52455e-12
ENSG00000163106	-3.17406	4.82773e-62
ENSG00000136883	1.43989	1.96888e-12
ENSG00000214357	-1.40862	2.53861e-28
ENSG00000101182	1.33354	1.57374e-22
ENSG00000112984	1.62225	1.14556e-29
ENSG00000121440	-1.04229	4.19556e-09
ENSG00000183230	-3.56629	2.53197e-32
ENSG00000139572	1.66686	2.24728e-13
ENSG00000170477	1.95727	7.12e-05
ENSG00000120068	2.12768	4.71014e-15
ENSG00000160716	-1.35966	8.044e-07
ENSG00000092621	1.5091	1.64708e-12
ENSG00000101197	2.03754	1.66607e-09
ENSG00000165410	-1.88989	1.56942e-17
ENSG00000182324	1.6829	3.35543e-23
ENSG00000126010	1.95789	1.10266e-09
ENSG00000167702	1.30226	1.86086e-14
ENSG00000182584	1.47742	2.17323e-18
ENSG00000104435	-4.29022	7.38199e-60
ENSG00000167701	-3.45507	7.30023e-49
ENSG00000120907	-2.93265	1.44269e-24
ENSG00000122375	-2.02558	2.97108e-07
ENSG00000134061	-1.61393	1.59259e-15
ENSG00000167216	-1.14323	6.46686e-12
ENSG00000114854	1.66901	2.9555e-07
ENSG00000183960	2.18184	5.096e-27
ENSG00000213886	1.92008	7.99762e-13
ENSG00000071909	1.06449	0.000172481
ENSG00000128652	-1.35447	5.27013e-11
ENSG00000101412	1.92687	6.22598e-39
ENSG00000171596	-1.03934	1.59346e-07
ENSG00000128645	-2.40005	8.44173e-25
ENSG00000187258	1.90759	1.40836e-05
ENSG00000162849	2.83738	1.35222e-36
ENSG00000169194	1.71548	0.000867215
ENSG00000250305	-1.01291	3.53879e-07
ENSG00000181104	1.10848	6.59274e-23
ENSG00000123572	-1.13204	3.2412e-05
ENSG00000178084	-4.67926	1.84837e-30
ENSG00000186038	-4.40022	2.31726e-39
ENSG00000149295	1.10725	0.000921694
ENSG00000169885	1.6539	9.34892e-07
ENSG00000147573	-2.59431	4.4786e-10
ENSG00000184185	-2.07379	9.65926e-15
ENSG00000015592	-4.79965	3.03097e-46
ENSG00000113327	-4.58615	6.16249e-30
ENSG00000147576	-2.81557	1.82562e-57
ENSG00000171522	-1.63503	4.41592e-27
ENSG00000147434	2.33736	2.26786e-07
ENSG00000170465	2.52291	0.00745926
ENSG00000140285	-1.46283	1.79003e-10
ENSG00000205336	1.37123	5.5943e-24
ENSG00000065320	-2.65278	5.59622e-52
ENSG00000172016	4.84548	1.83905e-22
ENSG00000079263	-1.53293	2.98256e-11
ENSG00000144820	-2.41359	3.08087e-17
ENSG00000167393	1.46505	6.68919e-24
ENSG00000167755	8.51003	7.46712e-78
ENSG00000169035	6.0626	8.99807e-41
ENSG00000130726	1.00937	7.11375e-17
ENSG00000030419	-1.01023	8.2666e-10
ENSG00000131187	1.75082	1.65625e-23
ENSG00000162843	-1.97812	6.01064e-09
ENSG00000160685	-1.34088	1.23388e-32
ENSG00000129451	4.10369	1.82545e-35
ENSG00000156920	-3.41692	9.1097e-12
ENSG00000102030	1.35348	6.0027e-20
ENSG00000198910	-2.95493	1.3941e-26
ENSG00000129675	-1.33106	1.11298e-25
ENSG00000120889	1.22753	5.67662e-23
ENSG00000104938	-3.42528	1.47709e-19
ENSG00000136634	-1.23719	4.95862e-11
ENSG00000042832	3.82516	4.10915e-43
ENSG00000145087	-2.7267	2.11891e-16
ENSG00000104689	1.0355	1.41482e-20
ENSG00000117322	-3.54198	1.80943e-19
ENSG00000181408	-1.60218	3.68349e-05
ENSG00000135914	-1.46069	1.07793e-06
ENSG00000144285	-1.43876	0.0256261
ENSG00000241399	-1.47685	6.38422e-18
ENSG00000186847	-2.60744	8.55208e-13
ENSG00000189366	1.27275	1.05052e-09
ENSG00000150593	-1.97563	1.15915e-61
ENSG00000141505	1.92424	2.86987e-17
ENSG00000083845	1.16114	7.97027e-11
ENSG00000266524	-2.04805	8.8851e-10
ENSG00000091583	-1.14436	6.86287e-05
ENSG00000152413	1.98344	5.4762e-33
ENSG00000088325	1.72447	2.75716e-32
ENSG00000177103	-2.97086	3.91563e-26
ENSG00000179772	1.75773	1.34038e-15
ENSG00000154188	-1.35691	3.26633e-14
ENSG00000147655	-4.37869	1.98649e-62
ENSG00000125743	1.02612	2.08093e-16
ENSG00000198276	1.31494	5.96968e-16
ENSG00000169252	-2.12701	7.53794e-31
ENSG00000106809	-5.26323	2.18315e-67
ENSG00000076641	-1.84928	1.97865e-30
ENSG00000165702	-2.52255	3.71159e-18
ENSG00000171951	-2.81009	7.08675e-43
ENSG00000111452	-1.32875	1.36042e-08
ENSG00000005844	-1.2702	4.15513e-13
ENSG00000171163	1.42715	7.70659e-26
ENSG00000162669	-1.95717	4.39281e-07
ENSG00000198846	-1.86802	1.0763e-25
ENSG00000153064	-1.5437	2.59371e-09
ENSG00000182481	1.1994	2.00042e-24
ENSG00000169764	-2.32853	4.38732e-58
ENSG00000111012	2.03552	8.62371e-44
ENSG00000130826	1.48671	3.33595e-65
ENSG00000026103	-1.47829	7.24735e-20
ENSG00000143869	-1.3236	1.4444e-08
ENSG00000115594	-1.19211	1.08146e-15
ENSG00000247077	1.04265	4.60482e-22
ENSG00000156574	1.14321	0.003014
ENSG00000157514	-1.18946	1.48274e-14
ENSG00000155659	-1.32939	1.81677e-11
ENSG00000110944	2.1562	3.24216e-30
ENSG00000124602	2.01083	3.95969e-30
ENSG00000122122	-1.06802	6.51512e-11
ENSG00000181634	1.54477	1.73131e-20
ENSG00000140678	1.07919	8.21127e-09
ENSG00000130720	1.45242	9.87398e-06
ENSG00000109819	-2.46271	2.91332e-27
ENSG00000018280	2.46859	8.98917e-31
ENSG00000189091	1.02098	4.40161e-38
ENSG00000173391	3.07967	6.13157e-32
ENSG00000188404	-1.05194	1.21423e-06
ENSG00000081059	1.76892	1.8945e-32
ENSG00000172315	1.00848	1.24376e-16
ENSG00000182566	-2.74486	5.82126e-18
ENSG00000104870	-1.01166	2.6517e-08
ENSG00000095739	1.23025	7.14996e-09
ENSG00000037965	1.20791	0.00482606
ENSG00000108821	2.54117	4.44172e-31
ENSG00000073711	-2.34081	5.63681e-72
ENSG00000116774	-1.11932	2.59506e-09
ENSG00000090659	-2.3187	2.64455e-40
ENSG00000131018	-1.50261	1.5737e-22
ENSG00000132514	-2.64148	8.32085e-53
ENSG00000167513	1.63847	9.38712e-29
ENSG00000120913	-1.02223	8.55805e-13
ENSG00000104522	1.33239	1.66693e-16
ENSG00000183918	-1.00602	3.66274e-06
ENSG00000134121	-2.79951	1.59921e-47
ENSG00000174837	-1.01884	2.73768e-06
ENSG00000188157	1.13488	1.8793e-16
ENSG00000185303	-1.6758	5.28123e-08
ENSG00000099958	-1.26697	2.8679e-09
ENSG00000116031	-1.86961	1.76159e-16
ENSG00000162367	-1.3252	5.15052e-20
ENSG00000136881	3.18022	1.75678e-14
ENSG00000036672	-4.19041	5.80555e-90
ENSG00000137309	1.3649	5.16748e-30
ENSG00000205213	-1.49479	2.90991e-23
ENSG00000118733	-4.22456	1.26365e-41
ENSG00000251493	2.38346	8.9481e-11
ENSG00000133661	-2.40487	4.03206e-14
ENSG00000122691	1.72544	5.68411e-18
ENSG00000174827	-1.49395	2.62929e-07
ENSG00000142748	1.73703	8.40651e-15
ENSG00000073008	1.07089	3.69092e-27
ENSG00000155307	-1.0721	5.19074e-09
ENSG00000139946	-1.5957	1.50602e-21
ENSG00000135374	3.47403	1.42885e-06
ENSG00000128739	-1.36088	3.30841e-11
ENSG00000132465	-4.31179	9.31102e-27
ENSG00000125835	1.15328	3.17747e-22
ENSG00000168477	-3.88457	2.01571e-61
ENSG00000153292	-1.18873	0.000184079
ENSG00000106263	1.12454	1.72011e-38
ENSG00000112799	-1.22314	2.33369e-12
ENSG00000148935	1.6041	5.08531e-15
ENSG00000166535	1.0171	0.0055478
ENSG00000128815	-1.00393	9.40755e-08
ENSG00000182557	1.51494	3.87506e-19
ENSG00000183018	1.68502	5.80116e-27
ENSG00000109943	-1.20324	3.20345e-07
ENSG00000169836	-1.90192	0.000195852
ENSG00000101361	1.42751	6.59382e-47
ENSG00000148680	-2.49345	3.80804e-39
ENSG00000134259	-1.25681	2.83102e-06
ENSG00000160683	-2.75177	1.03313e-14
ENSG00000254709	-2.71581	3.91616e-18
ENSG00000172236	-1.50641	3.96756e-15
ENSG00000196569	-1.37415	5.54329e-13
ENSG00000115257	1.15396	1.60827e-08
ENSG00000105202	1.20487	4.69847e-20
ENSG00000153253	-2.56901	6.48202e-40
ENSG00000151834	-1.95493	2.39989e-13
ENSG00000153814	-1.61707	1.07652e-24
ENSG00000150471	-2.69103	3.74885e-44
ENSG00000186188	-1.55571	1.06992e-06
ENSG00000119919	-2.67151	5.71985e-54
ENSG00000077327	-2.02754	5.62151e-06
ENSG00000128573	-2.59245	2.20994e-25
ENSG00000138795	1.96421	4.45895e-28
ENSG00000125630	1.14308	2.88655e-34
ENSG00000106789	-1.18622	7.01732e-24
ENSG00000075618	1.26733	1.48568e-10
ENSG00000187837	-1.98213	9.31898e-20
ENSG00000186417	-1.87967	3.15916e-13
ENSG00000123136	1.20344	8.90983e-30
ENSG00000171877	1.17576	1.24358e-07
ENSG00000175920	1.91614	3.75786e-16
ENSG00000171680	1.05682	2.16372e-15
ENSG00000010030	1.0997	3.43725e-10
ENSG00000186862	1.99704	5.15091e-25
ENSG00000106299	-1.0688	5.55499e-24
ENSG00000133116	-2.07306	2.8958e-28
ENSG00000105290	-1.61068	2.64074e-23
ENSG00000139187	-1.27531	4.17378e-13
ENSG00000203747	1.27392	2.94195e-08
ENSG00000186907	1.58621	1.0856e-11
ENSG00000165309	1.46779	0.000543924
ENSG00000223802	-2.14513	4.09772e-11
ENSG00000099139	-2.59748	3.09697e-53
ENSG00000123091	-1.0721	3.7441e-23
ENSG00000124762	-1.36254	1.85521e-18
ENSG00000175899	-1.39177	1.27201e-24
ENSG00000109705	-1.30698	1.94887e-07
ENSG00000118271	-2.49263	5.30822e-12
ENSG00000198597	-3.14236	4.89855e-41
ENSG00000197540	-1.70915	1.16931e-18
ENSG00000140459	-2.18885	1.58873e-16
ENSG00000102265	2.16445	1.68673e-47
ENSG00000163220	1.43564	4.7719e-09
ENSG00000130332	1.31481	5.19751e-17
ENSG00000270765	-1.4704	0.0011642
ENSG00000101194	2.21749	5.0629e-28
ENSG00000011332	1.19411	2.55477e-09
ENSG00000198574	-1.85174	8.63714e-17
ENSG00000205683	-2.99335	5.08874e-71
ENSG00000167759	-2.50966	1.211e-14
ENSG00000172367	-1.52608	1.38398e-10
ENSG00000034971	-7.44365	9.01106e-57
ENSG00000125675	-2.79896	5.62662e-41
ENSG00000163815	-4.03996	8.78987e-133
ENSG00000113805	-3.59649	2.38027e-44
ENSG00000015285	-1.06508	1.28865e-11
ENSG00000105383	-1.17569	2.2472e-12
ENSG00000017427	-2.22981	1.87764e-21
ENSG00000187912	-2.39079	9.5572e-13
ENSG00000107186	-1.41683	7.27508e-14
ENSG00000160973	-1.20368	9.76432e-08
ENSG00000123095	-1.3427	1.66161e-11
ENSG00000213463	-1.10813	2.19953e-24
ENSG00000139343	1.11135	3.0889e-22
ENSG00000142619	1.46245	7.28957e-05
ENSG00000139515	4.75248	7.79191e-103
ENSG00000134982	-1.19523	1.29553e-15
ENSG00000121858	-1.56704	4.52742e-26
ENSG00000105270	-1.53707	1.49444e-16
ENSG00000134115	-1.54028	0.000255319
ENSG00000091879	1.22372	1.89531e-18
ENSG00000145649	-1.74914	5.30367e-13
ENSG00000185008	1.58077	9.71217e-09
ENSG00000184828	-2.5519	3.96479e-28
ENSG00000160957	2.12582	1.31798e-47
ENSG00000165496	-2.58719	3.58471e-19
ENSG00000164692	1.48273	6.30702e-14
ENSG00000123610	1.1998	2.60691e-09
ENSG00000125820	-2.21626	5.83535e-10
ENSG00000259680	-3.1037	2.02984e-22
ENSG00000160214	1.12084	4.81032e-30
ENSG00000138685	-1.89205	4.87735e-18
ENSG00000134815	1.34568	1.56747e-31
ENSG00000143248	-1.06165	7.28921e-09
ENSG00000182256	-1.45839	0.0168868
ENSG00000130706	1.03519	3.40906e-20
ENSG00000144619	-2.64781	5.0669e-50
ENSG00000103037	1.06621	1.93854e-31
ENSG00000067113	-1.81842	1.24954e-69
ENSG00000110911	1.03225	4.85733e-17
ENSG00000104549	1.51074	5.38062e-18
ENSG00000117560	-1.01665	3.80126e-06
ENSG00000108370	-2.17553	7.75097e-34
ENSG00000105366	-2.04594	4.00335e-25
ENSG00000197275	1.52417	6.5665e-21
ENSG00000109101	-1.24655	1.31812e-05
ENSG00000162951	-3.23239	1.03217e-21
ENSG00000083782	5.20149	6.66693e-32
ENSG00000127423	1.966	5.27588e-36
ENSG00000146006	-1.57788	7.77641e-12
ENSG00000136457	-2.94615	3.59498e-36
ENSG00000139132	-1.1065	4.9961e-18
ENSG00000129455	6.91137	2.36307e-39
ENSG00000171509	-1.16081	1.05081e-08
ENSG00000166415	2.18963	1.19215e-09
ENSG00000134955	-1.14155	6.42818e-07
ENSG00000204851	-1.24387	1.26311e-08
ENSG00000128011	-1.23562	6.36585e-11
ENSG00000133067	1.05912	3.68581e-05
ENSG00000186469	-2.1275	1.27406e-63
ENSG00000167757	2.3181	5.83325e-14
ENSG00000096088	2.92379	6.58506e-21
ENSG00000186474	2.68444	3.62827e-18
ENSG00000174371	1.5136	1.04086e-19
ENSG00000167414	-2.75238	1.64451e-18
ENSG00000196338	-1.15908	3.82316e-10
ENSG00000129682	-1.49923	4.72035e-11
ENSG00000150995	-1.40946	1.40659e-21
ENSG00000133640	-1.24823	0.00618683
ENSG00000165171	1.23027	5.73515e-12
ENSG00000258839	1.24639	6.66502e-09
ENSG00000103375	-8.05225	1.3994e-87
ENSG00000143816	-1.36663	3.6983e-09
ENSG00000154342	1.05028	0.0188053
ENSG00000163499	-2.52734	8.82264e-18
ENSG00000188783	-2.99225	5.36283e-35
ENSG00000169710	1.58165	2.35508e-21
ENSG00000171017	2.74553	7.43945e-43
ENSG00000139200	-2.99224	9.28286e-48
ENSG00000185527	-1.34948	3.1573e-11
ENSG00000181218	2.04081	2.16179e-26
ENSG00000259384	-1.69647	0.00362095
ENSG00000103241	-1.27427	4.3294e-16
ENSG00000140623	-1.58627	9.48345e-05
ENSG00000007314	-1.98899	5.9453e-11
ENSG00000185774	-2.15576	2.20591e-36
ENSG00000169704	-1.57844	1.33179e-06
ENSG00000184489	2.11134	1.12963e-24
ENSG00000149970	-2.87484	1.17631e-29
ENSG00000203710	-1.62842	1.3399e-12
ENSG00000170382	-3.99702	1.60242e-68
ENSG00000163531	-1.29974	3.49749e-12
ENSG00000187239	-1.82724	3.08947e-49
ENSG00000167748	-1.49734	1.06746e-10
ENSG00000176658	-1.01669	5.22934e-11
ENSG00000221944	1.17795	3.74226e-22
ENSG00000178695	-1.61906	4.14669e-23
ENSG00000040608	1.5163	4.48763e-16
ENSG00000152763	-2.70335	4.10013e-42
ENSG00000139219	-2.01481	2.78519e-12
ENSG00000173698	-1.27187	1.24108e-06
ENSG00000166278	1.44762	7.19359e-20
ENSG00000198160	-1.41013	1.74629e-22
ENSG00000108375	2.01956	9.9546e-25
ENSG00000165891	1.76569	3.21584e-24
ENSG00000050405	-1.67765	6.41386e-32
ENSG00000175356	-2.51845	1.95834e-38
ENSG00000108479	1.54165	2.54523e-21
ENSG00000220205	-1.2988	9.43351e-38
ENSG00000197177	-1.41633	0.00422653
ENSG00000176533	-2.70172	1.48699e-66
ENSG00000127083	-3.79406	5.16954e-29
ENSG00000197157	1.09996	6.04023e-39
ENSG00000138346	1.28652	1.49134e-15
ENSG00000113088	-1.52615	9.92772e-11
ENSG00000182521	-2.57773	2.72386e-10
ENSG00000196468	-1.70566	0.019645
ENSG00000104814	-1.45224	1.19113e-14
ENSG00000184451	-1.82213	4.24944e-21
ENSG00000141294	1.20547	3.21676e-12
ENSG00000197992	-2.71926	7.82816e-35
ENSG00000115590	-2.66479	4.31829e-37
ENSG00000018236	-3.68982	1.20586e-45
ENSG00000168356	-3.72873	1.20089e-42
ENSG00000174963	-1.79234	0.0113065
ENSG00000134245	-1.24813	3.51895e-15
ENSG00000178999	1.31142	6.50444e-19
ENSG00000067715	-1.2705	3.10244e-05
ENSG00000188175	-2.8728	3.21949e-23
ENSG00000170122	1.27603	7.84519e-07
ENSG00000167083	-1.0722	1.8462e-11
ENSG00000269404	-5.594	2.23271e-109
ENSG00000150054	-1.22295	2.65062e-17
ENSG00000130635	1.40383	7.48364e-15
ENSG00000127241	-2.93437	1.26469e-21
ENSG00000148735	1.97473	7.11398e-18
ENSG00000145147	-1.95293	2.43041e-23
ENSG00000159200	-1.34009	2.4402e-27
ENSG00000130224	-2.06677	1.15379e-21
ENSG00000115602	-1.01975	6.86516e-08
ENSG00000185585	-1.12221	3.49461e-10
ENSG00000115604	-1.005	3.22523e-10
ENSG00000084674	-3.19274	7.41295e-11
ENSG00000260314	-1.42811	1.90166e-14
ENSG00000130558	-1.96149	1.14886e-26
ENSG00000172572	-2.57049	4.81007e-34
ENSG00000162188	-2.19747	9.85126e-21
ENSG00000139610	-1.35793	0.0124355
ENSG00000127928	2.51047	2.0474e-06
ENSG00000081052	-1.19597	2.23192e-07
ENSG00000108379	2.48597	4.32768e-35
ENSG00000139874	-1.52699	9.31504e-13
ENSG00000158955	1.0777	0.0156308
ENSG00000114251	1.37804	1.72546e-17
ENSG00000152580	-3.20248	5.11785e-31
ENSG00000213366	-1.53612	2.52596e-24
ENSG00000007908	1.5066	6.70924e-08
ENSG00000114790	-1.46436	1.63733e-11
ENSG00000103257	3.09821	2.41456e-66
ENSG00000172403	-3.44581	9.69257e-31
ENSG00000158113	1.75169	2.95463e-10
ENSG00000160193	1.5303	6.61979e-27
ENSG00000183908	-2.28039	4.34381e-29
ENSG00000196549	1.90463	4.14895e-12
ENSG00000080573	1.06636	1.93392e-09
ENSG00000131409	-1.1419	2.84284e-09
ENSG00000149972	-2.57229	2.05785e-07
ENSG00000127920	-1.18863	1.14768e-14
ENSG00000104921	-3.25913	3.60829e-22
ENSG00000115607	-1.20549	2.00458e-09
ENSG00000244122	-1.97909	9.94079e-08
ENSG00000241635	-4.1207	3.95071e-34
ENSG00000179588	1.10823	6.2541e-12
ENSG00000240224	-2.19799	0.0255928
ENSG00000166432	-1.33536	8.94446e-10
ENSG00000197565	-2.66426	6.18448e-34
ENSG00000164344	-1.41203	6.87281e-10
ENSG00000172061	1.7258	2.81106e-13
ENSG00000057593	1.96038	6.61541e-07
ENSG00000134202	-1.20034	1.53918e-07
ENSG00000125084	-1.19793	0.00296546
ENSG00000082482	-2.82913	2.53953e-17
ENSG00000185933	-1.35824	0.000136718
ENSG00000117298	-1.09944	3.52544e-17
ENSG00000188153	-1.39563	1.84549e-10
ENSG00000172380	-1.27656	4.63825e-17
ENSG00000205846	1.79337	7.31692e-05
ENSG00000122852	-2.07761	1.93513e-06
ENSG00000128482	-2.62039	1.40875e-44
ENSG00000105926	1.58832	7.7736e-17
ENSG00000162344	5.42939	3.4307e-17
ENSG00000130766	-1.13658	2.28512e-26
ENSG00000258227	3.36201	7.33475e-37
ENSG00000038427	1.20511	7.34214e-10
ENSG00000116039	1.21149	2.25027e-06
ENSG00000090661	-1.16584	2.70872e-07
ENSG00000168269	-1.55088	0.000726547
ENSG00000167654	-3.56932	1.51588e-33
ENSG00000070669	1.32824	5.39411e-40
ENSG00000164690	2.00112	1.76795e-25
ENSG00000066629	-1.73975	4.95975e-17
ENSG00000185974	2.8696	6.62586e-11
ENSG00000274641	1.07038	0.00663149
ENSG00000181773	2.78288	5.19115e-26
ENSG00000183801	-1.4078	5.58053e-21
ENSG00000185924	-1.6006	1.0269e-07
ENSG00000132000	1.61295	2.50897e-19
ENSG00000186564	-1.50639	8.70738e-15
ENSG00000165379	-1.85227	2.02733e-13
ENSG00000157927	-2.01839	1.4204e-18
ENSG00000119121	-4.76849	8.63892e-55
ENSG00000166159	-1.42332	0.00253945
ENSG00000164379	6.19091	2.31309e-159
ENSG00000077009	-2.90706	1.71025e-07
ENSG00000182132	-2.44407	4.92431e-17
ENSG00000116254	-1.16804	7.64656e-05
ENSG00000060718	5.91791	1.23521e-161
ENSG00000127418	2.06594	3.7451e-19
ENSG00000184347	-2.51426	6.07223e-31
ENSG00000102678	-2.17239	4.76526e-16
ENSG00000132932	-1.8202	8.90624e-24
ENSG00000152284	-1.30894	4.74084e-19
ENSG00000116983	-2.14518	1.0732e-11
ENSG00000103723	-2.41987	4.4934e-19
ENSG00000197241	-1.02804	0.0318904
ENSG00000169989	1.52507	2.23932e-16
ENSG00000134198	-1.55648	1.85523e-11
ENSG00000125872	2.41412	4.97778e-14
ENSG00000213171	-1.56503	8.34984e-09
ENSG00000213759	-2.2042	3.59968e-05
ENSG00000136231	1.28001	0.00112646
ENSG00000142583	-1.22287	1.33082e-09
ENSG00000157193	3.0329	5.93327e-66
ENSG00000105011	1.20181	6.14111e-20
ENSG00000171817	-1.51307	5.49455e-19
ENSG00000117114	-1.01283	5.29707e-12
ENSG00000158815	1.18578	0.00127341
ENSG00000136271	1.04935	4.00634e-63
ENSG00000012124	-2.47541	2.23942e-18
ENSG00000172260	-2.89529	6.5196e-49
ENSG00000180573	-1.03353	6.12336e-10
ENSG00000184434	-3.21922	3.58847e-53
ENSG00000109758	1.08578	0.0155734
ENSG00000121743	2.9927	2.31569e-18
ENSG00000181656	-2.64789	8.88294e-17
ENSG00000075539	-1.07386	6.06523e-13
ENSG00000105989	6.15758	4.24775e-145
ENSG00000162631	-3.51473	1.97134e-23
ENSG00000088827	-1.59963	1.82591e-15
ENSG00000173825	1.06251	8.77152e-09
ENSG00000126861	-1.55344	2.54181e-10
ENSG00000131951	1.74113	1.34241e-06
ENSG00000107831	2.14151	0.000350804
ENSG00000043355	3.49809	4.0652e-19
ENSG00000107807	3.6692	8.42049e-44
ENSG00000162444	-1.05774	1.14331e-08
ENSG00000120162	-1.70345	1.01315e-43
ENSG00000204950	1.18876	1.0856e-06
ENSG00000173641	-2.34465	1.22034e-11
ENSG00000137269	-1.20436	2.00494e-32
ENSG00000118432	-4.43738	3.44338e-49
ENSG00000173114	-2.10297	6.79471e-19
ENSG00000147465	-1.43338	2.25164e-07
ENSG00000137168	1.16214	1.16202e-25
ENSG00000174482	-1.08482	0.0050788
ENSG00000130592	-1.40784	2.18408e-19
ENSG00000187134	-1.54437	3.32517e-13
ENSG00000154277	-2.50221	1.03525e-28
ENSG00000148948	-2.01255	4.34643e-12
ENSG00000205922	3.01679	3.40566e-09
ENSG00000151322	-2.02632	6.59191e-17
ENSG00000133740	1.20054	9.14767e-24
ENSG00000161647	1.41668	1.06054e-14
ENSG00000142632	1.21044	1.122e-18
ENSG00000162745	1.7755	7.51464e-23
ENSG00000113209	-1.37158	2.02117e-11
ENSG00000204033	-1.3284	1.13661e-05
ENSG00000106927	1.11672	6.75882e-06
ENSG00000111796	-2.38932	8.56473e-34
ENSG00000136695	2.45028	0.0125803
ENSG00000174145	-2.97514	3.54511e-23
ENSG00000046889	-1.53887	2.32465e-24
ENSG00000102466	-1.71766	5.16834e-11
ENSG00000077943	-2.04471	2.33054e-43
ENSG00000168542	1.07972	1.3393e-08
ENSG00000198739	-1.78814	0.00361318
ENSG00000179796	-3.63225	4.61713e-22
ENSG00000127588	-3.20217	2.88065e-27
ENSG00000169918	-1.77275	5.3173e-20
ENSG00000264230	-2.60966	3.66245e-15
ENSG00000110848	-1.62892	8.6016e-20
ENSG00000116016	-1.28739	5.27886e-31
ENSG00000150045	-2.22573	1.3022e-21
ENSG00000154553	-1.67501	2.7725e-13
ENSG00000110852	-1.014	1.92016e-08
ENSG00000186766	-1.75904	5.03571e-08
ENSG00000170835	4.0837	3.33214e-24
ENSG00000123338	-1.21663	4.77396e-18
ENSG00000099889	1.0321	6.03126e-12
ENSG00000203814	1.13165	2.35145e-05
ENSG00000112541	1.02969	5.8041e-06
ENSG00000100079	-2.78966	5.4235e-25
ENSG00000081277	3.26827	6.32415e-43
ENSG00000170677	-1.1627	4.64358e-24
ENSG00000023902	-1.19554	2.30969e-14
ENSG00000140479	-1.03761	6.63476e-12
ENSG00000187140	-3.94567	1.79578e-33
ENSG00000125485	1.16308	2.40204e-60
ENSG00000187498	1.46678	9.97927e-18
ENSG00000016082	-1.23602	0.00108168
ENSG00000148840	1.11789	5.90852e-30
ENSG00000054967	1.28152	1.77336e-21
ENSG00000188993	-2.09039	2.35063e-24
ENSG00000164171	1.29697	1.62678e-19
ENSG00000161640	-2.05926	3.01293e-23
ENSG00000141738	1.58192	1.68041e-21
ENSG00000168676	1.4158	1.0196e-05
ENSG00000163032	2.49703	1.71134e-31
ENSG00000211445	-2.31352	7.25292e-29
ENSG00000168243	1.68471	5.81107e-07
ENSG00000176204	-2.13527	1.81807e-09
ENSG00000124440	-2.59263	2.15442e-19
ENSG00000154265	-1.56947	5.25454e-17
ENSG00000130287	-2.20867	1.61797e-09
ENSG00000124253	-3.41487	6.2063e-44
ENSG00000105492	-2.14617	9.40309e-21
ENSG00000129810	1.05459	3.63247e-12
ENSG00000183873	-1.18228	1.3731e-07
ENSG00000146221	-1.13051	0.00180444
ENSG00000104332	-5.19958	1.11745e-68
ENSG00000169862	-3.63959	2.68528e-52
ENSG00000149534	-2.31434	1.95371e-25
ENSG00000075702	1.99317	4.00108e-41
ENSG00000184709	-1.04236	0.000422391
ENSG00000082146	-1.09804	7.85909e-18
ENSG00000115993	-1.11857	3.90977e-58
ENSG00000116218	-1.77616	6.49921e-05
ENSG00000127399	1.15139	1.93739e-23
ENSG00000164120	-3.39656	2.0922e-60
ENSG00000197343	-1.00923	5.9867e-10
ENSG00000136854	1.13906	2.91112e-10
ENSG00000132746	2.85042	3.38783e-18
ENSG00000149571	-1.86416	2.97646e-14
ENSG00000104880	-1.11868	1.18271e-14
ENSG00000123570	-2.28728	4.55383e-23
ENSG00000204335	3.46704	2.49525e-35
ENSG00000082126	1.70698	2.58381e-05
ENSG00000197472	1.71473	6.56504e-17
ENSG00000125319	1.39326	4.94728e-27
ENSG00000171551	1.44223	3.22365e-05
ENSG00000114200	-4.53313	1.54411e-69
ENSG00000100505	-3.31022	5.13349e-48
ENSG00000143995	-1.73646	3.07516e-18
ENSG00000118707	1.79048	2.95027e-58
ENSG00000116132	1.19713	2.55954e-10
ENSG00000159263	4.35443	1.21094e-108
ENSG00000198914	-3.04887	5.01916e-17
ENSG00000196188	-1.10096	0.00180846
ENSG00000172828	-2.259	5.81432e-30
ENSG00000172831	-2.27419	5.93163e-36
ENSG00000258429	1.31138	3.08332e-16
ENSG00000172156	-1.26568	7.51383e-13
ENSG00000108700	-2.60965	2.12775e-21
ENSG00000137673	6.74294	2.89266e-86
ENSG00000196611	4.02327	1.0584e-45
ENSG00000181374	-2.5034	2.00912e-24
ENSG00000101782	-1.63815	3.00357e-37
ENSG00000120833	-1.26694	3.87893e-27
ENSG00000152455	1.08297	1.37661e-25
ENSG00000134020	-1.57022	4.46547e-07
ENSG00000171564	3.57543	6.32131e-08
ENSG00000076513	-1.09272	3.39965e-24
ENSG00000155846	-1.4251	1.10045e-31
ENSG00000163412	-1.9969	1.03656e-40
ENSG00000196353	-3.25677	2.74667e-18
ENSG00000129048	-1.60859	7.85469e-11
ENSG00000173535	1.23658	1.21918e-13
ENSG00000131142	1.26115	0.00369084
ENSG00000176842	3.76667	1.72591e-23
ENSG00000128524	1.02013	8.81879e-23
ENSG00000140939	1.00627	3.38844e-17
ENSG00000156299	-1.74446	8.28217e-28
ENSG00000034239	-1.88855	1.34295e-12
ENSG00000179520	-5.51215	9.51861e-48
ENSG00000141506	-1.07254	2.07935e-10
ENSG00000131849	-1.2024	8.78443e-23
ENSG00000078328	-2.19977	1.46192e-12
ENSG00000156113	-2.80031	2.38018e-39
ENSG00000182782	1.49313	2.74397e-07
ENSG00000255398	2.85224	2.67495e-17
ENSG00000088538	-1.12761	2.14928e-05
ENSG00000005187	-1.26353	3.43179e-15
ENSG00000108352	-1.15484	5.43319e-13
ENSG00000161016	1.03994	2.60357e-12
ENSG00000185630	-1.35489	1.51422e-21
ENSG00000144648	-2.81527	1.18859e-53
ENSG00000165376	5.55766	3.3436e-63
ENSG00000240771	-1.83526	4.43656e-18
ENSG00000187955	-1.46027	1.31144e-12
ENSG00000117090	-1.51409	4.55448e-15
ENSG00000065328	1.75759	2.06355e-28
ENSG00000158106	3.15101	2.96127e-66
ENSG00000111846	-4.11604	3.8413e-119
ENSG00000173585	-1.9975	5.79456e-13
ENSG00000101189	1.63332	3.00489e-56
ENSG00000178750	-1.33632	3.21369e-12
ENSG00000134352	-1.26497	1.75634e-22
ENSG00000115758	1.18927	2.68083e-18
ENSG00000165521	-2.38277	3.64937e-16
ENSG00000167074	-1.8013	4.12825e-56
ENSG00000029153	2.29446	3.67962e-50
ENSG00000125207	5.4042	4.4224e-38
ENSG00000143184	-1.49042	5.58488e-08
ENSG00000152056	1.40938	3.73361e-21
ENSG00000114698	-1.73211	2.45472e-37
ENSG00000140092	-1.21899	1.08204e-14
ENSG00000001617	1.04108	5.29087e-09
ENSG00000145423	-1.81615	1.63129e-10
ENSG00000135919	1.21211	6.09727e-13
ENSG00000087085	-1.2292	7.07583e-11
ENSG00000147852	-1.14368	3.72202e-08
ENSG00000062822	1.05217	8.24636e-13
ENSG00000163918	1.08451	1.0111e-23
ENSG00000104888	-3.09318	5.74618e-47
ENSG00000241186	2.5461	2.43253e-19
ENSG00000186517	-1.02521	1.21773e-11
ENSG00000198961	-1.42024	1.0074e-44
ENSG00000180817	1.0843	9.58801e-26
ENSG00000160505	-1.97979	0.00220906
ENSG00000117472	-2.38372	8.58806e-40
ENSG00000101680	-2.59988	1.16055e-31
ENSG00000183684	1.01176	3.29907e-19
ENSG00000106366	2.21901	4.62581e-32
ENSG00000159212	-1.2853	1.23491e-09
ENSG00000152192	1.1513	0.00670768
ENSG00000107562	-2.80444	4.32406e-60
ENSG00000174600	-1.42154	2.06963e-22
ENSG00000272602	-1.21542	7.33695e-10
ENSG00000180772	-1.69577	0.0328083
ENSG00000159216	1.20173	1.85807e-26
ENSG00000174080	-1.23277	3.67134e-12
ENSG00000050555	-1.21026	4.69225e-07
ENSG00000163346	-1.03192	1.67296e-18
ENSG00000154917	-1.86286	2.58905e-22
ENSG00000136944	-1.4268	0.000474533
ENSG00000242366	-5.10681	4.25388e-76
ENSG00000225614	1.59386	5.65217e-17
ENSG00000085999	1.51348	4.03772e-25
ENSG00000242515	-4.25132	7.29061e-88
ENSG00000241119	-3.28412	5.11307e-16
ENSG00000043039	-2.53302	9.26055e-19
ENSG00000184515	-1.01357	6.29583e-05
ENSG00000103148	1.23642	2.95588e-26
ENSG00000053254	-1.36842	4.3925e-37
ENSG00000100744	-1.00683	3.08677e-11
ENSG00000184575	1.21988	7.66437e-31
ENSG00000115009	1.04997	6.44745e-06
ENSG00000213186	1.10178	7.53147e-16
ENSG00000152669	3.1724	3.69287e-50
ENSG00000119541	-1.10732	2.40091e-25
ENSG00000206075	3.08959	4.37793e-23
ENSG00000134138	-1.61342	2.04031e-15
ENSG00000140451	1.5712	1.64203e-22
ENSG00000148180	-1.72467	1.59072e-38
ENSG00000129151	1.20926	0.0183528
ENSG00000109205	2.17408	1.11812e-09
ENSG00000165406	-1.43409	3.16293e-42
ENSG00000103740	-1.03774	2.07547e-07
ENSG00000152672	-2.05951	1.38679e-14
ENSG00000103269	1.37916	2.88857e-10
ENSG00000160460	-1.58555	6.38086e-13
ENSG00000140297	-2.80324	1.4053e-26
ENSG00000153404	-1.50895	1.37389e-07
ENSG00000167711	1.30031	1.22787e-09
ENSG00000136943	1.15781	7.22509e-10
ENSG00000166396	3.13599	2.14504e-10
ENSG00000137265	-2.6099	4.46493e-30
ENSG00000124203	-1.77941	1.69652e-14
ENSG00000112182	-1.29863	3.86063e-09
ENSG00000006606	1.52078	2.45466e-07
ENSG00000176928	-2.46902	1.28681e-26
ENSG00000198963	-1.96879	1.22807e-14
ENSG00000106178	1.67461	1.89951e-10
ENSG00000186790	-1.34879	5.18182e-05
ENSG00000090932	1.04012	0.00237666
ENSG00000134107	1.01498	9.54206e-22
ENSG00000172543	-1.74016	4.93438e-22
ENSG00000124406	-1.81709	1.76089e-22
ENSG00000101407	1.08086	8.70046e-27
ENSG00000151882	-2.67022	1.42967e-29
ENSG00000197888	-4.57841	3.90891e-36
ENSG00000135069	2.72798	6.89697e-73
ENSG00000196620	-3.0128	2.01976e-25
ENSG00000135960	1.7363	8.73581e-09
ENSG00000165457	-1.88633	8.3213e-26
ENSG00000109181	-2.35633	1.12978e-09
ENSG00000136842	-2.55007	1.44642e-24
ENSG00000135220	-4.65445	2.82673e-44
ENSG00000130158	1.01618	1.18027e-14
ENSG00000053770	-1.04137	1.57594e-23
ENSG00000110375	2.42953	1.78476e-08
ENSG00000162129	1.18628	1.19393e-25
ENSG00000092421	-3.02629	1.42067e-65
ENSG00000171234	-1.72093	2.8553e-09
ENSG00000115380	-1.2805	7.23479e-10
ENSG00000153563	-1.20864	1.25271e-10
ENSG00000050344	2.44292	5.77569e-63
ENSG00000056487	-1.76784	2.33261e-05
ENSG00000100154	-1.36994	7.61452e-21
ENSG00000156096	1.42464	0.0125801
ENSG00000091157	-1.17101	5.61821e-49
ENSG00000095539	-1.03645	1.68964e-09
ENSG00000117758	-1.07971	2.55509e-22
ENSG00000105246	-1.17661	4.31566e-12
ENSG00000105219	4.51371	1.91915e-62
ENSG00000132639	-3.7424	1.61878e-44
ENSG00000099937	2.30195	3.52243e-09
ENSG00000137502	-1.23584	4.09593e-21
ENSG00000215475	-1.23117	0.0012738
ENSG00000168671	-2.16002	1.66416e-09
ENSG00000070985	-1.25487	3.29094e-06
ENSG00000149257	1.32615	2.4452e-26
ENSG00000169213	-1.68307	1.67942e-16
ENSG00000148175	-1.20454	7.07206e-14
ENSG00000069667	-1.02645	2.04208e-10
ENSG00000158373	-1.00347	4.75761e-09
ENSG00000137877	2.42942	8.81673e-25
ENSG00000134757	3.05301	5.34972e-16
ENSG00000163297	-1.19629	6.25149e-19
ENSG00000124678	1.76913	0.000229271
ENSG00000073146	1.25073	2.59268e-05
ENSG00000140093	1.07032	0.0060932
ENSG00000015475	1.108	2.62826e-21
ENSG00000109047	-1.26963	5.31439e-05
ENSG00000119514	-1.43089	2.18989e-24
ENSG00000198046	-1.62919	6.1311e-15
ENSG00000028277	-1.59138	9.28656e-19
ENSG00000255587	-1.43653	2.09496e-11
ENSG00000170099	-1.71797	4.04789e-07
ENSG00000184486	2.25277	4.76069e-06
ENSG00000250021	-1.57283	2.82872e-21
ENSG00000133119	1.69019	1.21139e-36
ENSG00000112116	1.63534	0.00281324
ENSG00000186910	-1.95215	3.88294e-06
ENSG00000170054	-3.81275	5.11491e-13
ENSG00000177301	-1.51597	5.88238e-08
ENSG00000135312	1.05826	8.68069e-05
ENSG00000142185	1.60655	6.90417e-18
ENSG00000164362	1.41709	4.00597e-09
ENSG00000102003	-1.91413	2.68275e-32
ENSG00000163132	2.59909	1.19341e-27
ENSG00000137077	-2.41011	2.22489e-24
ENSG00000121933	-2.0176	2.74023e-30
ENSG00000188488	-1.76454	1.14238e-17
ENSG00000100665	4.96882	5.45887e-26
ENSG00000119969	1.29462	8.07389e-16
ENSG00000214078	1.58758	5.23101e-21
ENSG00000161800	1.09237	1.14729e-28
ENSG00000136689	1.7234	5.91143e-13
ENSG00000239961	-1.92442	5.5531e-11
ENSG00000127586	1.88037	1.10852e-34
ENSG00000135744	1.95209	5.35857e-18
ENSG00000204174	-1.31674	1.64346e-06
ENSG00000184293	-2.08156	7.88235e-19
ENSG00000115163	1.46234	7.25984e-29
ENSG00000056972	-1.02583	1.28558e-25
ENSG00000215009	-1.71522	1.98245e-07
ENSG00000144642	-1.67917	1.47565e-21
ENSG00000177575	-1.16347	4.89355e-09
ENSG00000155966	-1.52955	3.0763e-07
ENSG00000077420	-1.41852	1.74334e-17
ENSG00000133169	-3.49173	1.17156e-24
ENSG00000213088	-2.35984	1.32287e-29
ENSG00000128487	-1.3001	4.09105e-30
ENSG00000186871	1.69928	9.39788e-22
ENSG00000198848	-1.92572	3.03458e-12
ENSG00000164440	-1.9855	2.13274e-20
ENSG00000010318	-1.06396	1.1124e-18
ENSG00000183549	-2.73789	5.3215e-29
ENSG00000189377	3.31787	4.05558e-10
ENSG00000134321	-1.68876	3.96951e-15
ENSG00000164929	-2.76031	3.80333e-36
ENSG00000136436	-1.15431	3.5343e-31
ENSG00000010319	-2.18386	9.74054e-34
ENSG00000114346	1.61382	9.94221e-23
ENSG00000128714	1.11285	0.0162168
ENSG00000133134	-1.58774	2.52898e-07
ENSG00000169760	-3.96156	9.45631e-37
ENSG00000106483	2.88807	1.48736e-23
ENSG00000176472	-2.00292	9.45463e-45
ENSG00000137166	1.02136	3.91115e-19
ENSG00000183763	1.30582	9.16936e-33
ENSG00000100532	-1.00984	4.23523e-17
ENSG00000123561	1.70223	0.000424644
ENSG00000059915	-2.22097	4.90814e-15
ENSG00000122574	-1.11462	5.55959e-08
ENSG00000113140	1.42384	4.14383e-20
ENSG00000204410	1.63801	3.59299e-21
ENSG00000146938	-2.37536	2.10315e-35
ENSG00000124875	1.99031	3.60019e-15
ENSG00000243646	-1.02082	5.08208e-19
ENSG00000163736	3.22109	5.91336e-14
ENSG00000081041	1.70474	3.95796e-14
ENSG00000168268	1.62294	1.9079e-25
ENSG00000148346	1.29614	3.75157e-05
ENSG00000182240	1.13011	1.71769e-12
ENSG00000122824	-2.09758	3.87843e-18
ENSG00000160856	-2.04062	1.06347e-11
ENSG00000100368	-1.30349	6.96786e-15
ENSG00000276644	1.69815	2.8409e-19
ENSG00000100985	1.40817	2.9846e-08
ENSG00000039139	2.02276	1.05195e-15
ENSG00000110881	2.03705	5.64437e-25
ENSG00000172578	-1.38104	2.11736e-11
ENSG00000101444	1.81579	5.91066e-34
ENSG00000109471	-2.50381	4.27002e-06
ENSG00000057468	1.1864	0.000277398
ENSG00000137872	-3.31914	4.26444e-52
ENSG00000172023	6.3384	1.63751e-27
ENSG00000115386	5.9865	5.19976e-28
ENSG00000128050	1.09057	3.67762e-23
ENSG00000170075	-1.74831	1.61216e-25
ENSG00000164659	-1.47321	3.93115e-08
ENSG00000167914	2.25588	6.72545e-18
ENSG00000158874	4.17055	3.41844e-08
ENSG00000164251	-1.21731	9.5142e-20
ENSG00000172379	-1.08177	2.22388e-09
ENSG00000188505	-2.06913	2.07091e-11
ENSG00000180574	1.04792	1.77404e-06
ENSG00000157152	-2.15541	4.65522e-27
ENSG00000093167	-1.09904	6.37731e-34
ENSG00000130816	1.09039	3.84274e-23
ENSG00000168702	-2.08829	8.52154e-08
ENSG00000178773	5.30405	2.23463e-122
ENSG00000166866	-1.96717	3.86339e-39
ENSG00000143858	-1.35352	8.65502e-10
ENSG00000180616	-2.32714	7.51721e-41
ENSG00000114554	1.49724	5.74745e-32
ENSG00000178662	-1.65015	7.55087e-14
ENSG00000187741	1.55732	7.25548e-35
ENSG00000144452	1.56573	4.22184e-05
ENSG00000196890	1.6901	5.99284e-12
ENSG00000007312	-1.88808	8.99044e-16
ENSG00000184613	-1.4934	1.67164e-11
ENSG00000185149	-5.19598	1.28757e-41
ENSG00000147256	-3.07263	4.76049e-14
ENSG00000174562	-2.17832	7.91201e-18
ENSG00000196917	2.20885	1.32702e-09
ENSG00000154263	-1.65181	1.38349e-16
ENSG00000104290	1.12171	1.08919e-11
ENSG00000109436	-1.251	2.31614e-16
ENSG00000166743	-1.09104	3.37734e-09
ENSG00000156738	-3.34602	3.63413e-19
ENSG00000130827	1.19511	5.28526e-20
ENSG00000162722	-2.77967	1.17484e-23
ENSG00000100401	1.0691	1.10487e-30
ENSG00000135218	-2.70789	1.3774e-44
ENSG00000104894	-1.19403	7.83596e-09
ENSG00000112782	-2.17501	1.44223e-26
ENSG00000132031	2.25594	6.81479e-21
ENSG00000088305	1.20122	3.74938e-14
ENSG00000119950	-1.65524	1.78066e-43
ENSG00000124143	2.44528	0.000341829
ENSG00000146166	-2.18166	2.6438e-06
ENSG00000101438	-2.46455	0.000113431
ENSG00000088756	-1.55204	2.5127e-24
ENSG00000126777	-1.10051	1.0083e-15
ENSG00000256683	-1.06565	9.5947e-13
ENSG00000154734	-1.58057	1.99102e-17
ENSG00000183023	-1.07459	4.52063e-09
ENSG00000006740	-2.6484	5.48395e-45
ENSG00000204022	-1.25164	0.00132063
ENSG00000184012	-1.44598	4.91657e-25
ENSG00000215018	-2.00586	9.27466e-21
ENSG00000140937	1.55791	3.60154e-29
ENSG00000105894	-2.82153	5.37243e-78
ENSG00000143882	2.20202	3.80379e-43
ENSG00000159399	-1.18434	6.21889e-15
ENSG00000205038	-4.17299	1.36311e-67
ENSG00000143355	-1.1326	0.014929
ENSG00000135905	-1.37982	1.42486e-18
ENSG00000110324	-1.35421	1.56567e-19
ENSG00000176153	1.01679	1.10673e-10
ENSG00000107719	2.01675	9.72003e-27
ENSG00000132561	-1.61045	2.10715e-24
ENSG00000108924	-2.57377	2.56385e-26
ENSG00000106952	-1.27643	1.31024e-13
ENSG00000070814	1.01942	1.50215e-22
ENSG00000117707	1.42421	4.84184e-13
ENSG00000163873	-3.33291	3.55329e-41
ENSG00000134184	-1.0697	1.50375e-06
ENSG00000144893	-1.61095	2.01481e-11
ENSG00000119042	-1.27135	4.76981e-11
ENSG00000043591	-1.93132	2.39978e-16
ENSG00000138079	-1.75085	8.33803e-12
ENSG00000152601	-1.00995	1.03887e-27
ENSG00000155962	-1.58932	4.33218e-22
ENSG00000197124	-1.47308	2.03907e-10
ENSG00000141338	-4.99607	1.0223e-88
ENSG00000154258	-3.11857	4.63695e-42
ENSG00000165899	-1.31693	8.93614e-06
ENSG00000169583	1.34867	1.54749e-10
ENSG00000165895	-1.2333	1.26633e-16
ENSG00000174611	-1.91664	1.96908e-07
ENSG00000154262	-2.70617	1.59652e-38
ENSG00000123388	4.57966	1.4142e-11
ENSG00000076555	-1.71046	2.81348e-27
ENSG00000134201	-2.95278	3.88524e-66
ENSG00000117724	1.10193	3.61269e-09
ENSG00000103152	1.10814	1.51789e-16
ENSG00000189058	-1.33717	4.40377e-07
ENSG00000158859	1.91649	2.86118e-16
ENSG00000111058	-1.08475	1.16872e-07
ENSG00000008300	2.26834	6.69165e-29
ENSG00000145113	-2.0873	2.31011e-13
ENSG00000134207	-2.09408	1.4018e-09
ENSG00000183111	-1.6879	3.26609e-44
ENSG00000105707	1.44266	2.95004e-06
ENSG00000124882	2.16135	8.59172e-11
ENSG00000117054	-1.48084	2.72057e-27
ENSG00000165912	1.46488	9.68876e-08
ENSG00000255833	-1.47845	7.80567e-16
ENSG00000166165	-2.24693	1.22285e-10
ENSG00000168003	1.07891	2.7724e-23
ENSG00000173372	-1.35751	2.0512e-17
ENSG00000163219	-1.18183	2.86794e-15
ENSG00000137960	-1.21485	3.31877e-09
ENSG00000162616	-1.14265	5.2441e-20
ENSG00000185238	1.11209	9.04956e-43
ENSG00000164778	3.63437	1.99771e-13
ENSG00000112715	1.29271	1.46139e-25
ENSG00000155269	1.06903	0.000423595
ENSG00000111732	-3.0397	1.18867e-11
ENSG00000137449	-1.27121	2.48388e-25
ENSG00000165271	1.17696	4.57075e-36
ENSG00000107864	-1.51262	5.90546e-55
ENSG00000164691	-1.38447	3.15979e-21
ENSG00000073536	1.39144	2.00061e-31
ENSG00000132872	-4.44718	1.96397e-41
ENSG00000145244	3.34307	1.84846e-42
ENSG00000187288	-2.29415	7.50939e-16
ENSG00000120057	-5.27085	5.52922e-39
ENSG00000122728	1.39232	0.00278879
ENSG00000164039	-1.14085	1.5307e-16
ENSG00000002745	-1.27262	9.39339e-05
ENSG00000165973	-1.04769	0.000124191
ENSG00000170743	-2.7062	7.89922e-15
ENSG00000106688	-1.95818	1.5471e-21
ENSG00000065609	-3.81063	2.00221e-33
ENSG00000244067	-1.52197	2.38721e-05
ENSG00000124491	-2.47699	1.41502e-29
ENSG00000114993	1.23444	9.54132e-40
ENSG00000110436	-1.32056	2.97942e-07
ENSG00000124507	-2.00653	1.33625e-24
ENSG00000124664	-1.56871	1.39465e-09
ENSG00000204614	-2.70033	2.38437e-26
ENSG00000243955	-2.90141	1.21963e-22
ENSG00000169676	-1.81317	3.4375e-05
ENSG00000095596	1.91754	9.1124e-07
ENSG00000075275	2.52094	3.55215e-45
ENSG00000214575	-3.59072	4.65671e-45
ENSG00000204983	1.18187	0.000855977
ENSG00000184113	-2.14386	2.09524e-27
ENSG00000183578	-1.90356	6.43297e-29
ENSG00000165124	-1.56671	1.25603e-15
ENSG00000132382	1.05446	2.88519e-22
ENSG00000140287	-1.58941	7.16146e-13
ENSG00000124713	1.22568	1.14996e-06
ENSG00000165462	-4.26888	8.50137e-34
ENSG00000141040	-1.21005	2.80221e-12
ENSG00000105737	-2.65687	6.21935e-24
ENSG00000166311	-1.7233	4.11526e-59
ENSG00000124207	1.32743	7.78734e-36
ENSG00000080839	1.00989	7.11091e-14
ENSG00000100228	2.02922	5.87383e-26
ENSG00000164330	-1.54903	1.14124e-22
ENSG00000151224	1.8671	2.73816e-09
ENSG00000128271	-1.39493	6.54171e-08
ENSG00000004777	1.10894	2.57338e-10
ENSG00000137270	1.50968	0.0130903
ENSG00000240505	-3.77901	6.96343e-41
ENSG00000166313	-1.42981	2.33012e-15
ENSG00000100625	2.30604	2.06268e-26
ENSG00000152208	-2.34551	2.90394e-05
ENSG00000149403	-1.09006	2.16876e-05
ENSG00000074696	1.12549	2.77918e-26
ENSG00000188089	1.39349	5.39165e-09
ENSG00000004468	-1.33803	3.56521e-10
ENSG00000016402	1.25364	5.88614e-16
ENSG00000111802	-1.97039	2.408e-43
ENSG00000188822	-2.77067	3.88853e-17
ENSG00000185499	-1.06251	4.51542e-05
ENSG00000188162	1.11946	0.0279221
ENSG00000105369	-2.89001	1.30889e-25
ENSG00000184160	1.39618	5.92957e-07
ENSG00000070193	-1.98837	2.26596e-16
ENSG00000243708	1.11007	5.59659e-06
ENSG00000125657	2.52836	9.30396e-23
ENSG00000145220	1.12273	1.50403e-26
ENSG00000011347	1.55593	3.77038e-19
ENSG00000144712	-1.87325	3.99964e-22
ENSG00000115297	-1.80608	1.16096e-15
ENSG00000188778	-3.29706	1.14098e-14
ENSG00000006327	2.70106	7.79255e-57
ENSG00000205143	1.12287	2.07447e-05
ENSG00000157823	-1.19464	7.22516e-48
ENSG00000156427	1.66726	4.87122e-15
ENSG00000101605	-2.95938	2.40902e-41
ENSG00000196361	-4.17173	1.19769e-31
ENSG00000085741	1.04281	0.000360242
ENSG00000136305	-1.80542	4.36577e-14
ENSG00000188064	5.01127	2.1718e-33
ENSG00000107937	1.11124	1.9595e-57
ENSG00000176194	-4.15392	3.6548e-13
ENSG00000189067	-1.14109	7.49165e-28
ENSG00000163810	-1.43482	3.18191e-06
ENSG00000174791	1.14257	1.06043e-18
ENSG00000104267	-5.08801	8.41873e-46
ENSG00000103942	-1.85874	3.62661e-16
ENSG00000196739	1.66648	7.38674e-18
ENSG00000138109	-1.40287	5.11429e-05
ENSG00000179934	2.19196	4.05491e-19
ENSG00000167555	-1.78319	1.78588e-21
ENSG00000142544	1.36031	5.25209e-17
ENSG00000172159	-2.59595	4.43981e-36
ENSG00000159184	1.68586	0.00014087
ENSG00000164129	-2.99811	1.4735e-15
ENSG00000138115	-1.69011	6.13879e-08
ENSG00000116678	-1.50452	1.46499e-22
ENSG00000104371	6.22679	1.68687e-46
[truncated: 339 more rows]

## Sheet: 2154 DElncRNAs
Ensembl id	log2FoldChange	pvalue
ENSG00000272438	1.56458	0.016864
ENSG00000230699	1.53801	0.00030554
ENSG00000272512	1.02482	5.14534e-07
ENSG00000273443	2.14466	0.000210026
ENSG00000272141	1.21006	5.01384e-10
ENSG00000272455	1.19718	3.74209e-37
ENSG00000272106	-1.27094	6.90115e-27
ENSG00000233542	4.64982	7.98419e-39
ENSG00000228037	-1.14303	2.88474e-17
ENSG00000177133	-2.05071	6.97461e-13
ENSG00000272235	1.07783	7.2723e-05
ENSG00000227372	-1.80062	1.97003e-30
ENSG00000270035	2.04591	3.17163e-06
ENSG00000269978	3.23298	1.86346e-12
ENSG00000238290	1.33416	1.28845e-05
ENSG00000232912	-1.47496	1.70006e-10
ENSG00000228526	1.39632	0.000183024
ENSG00000234546	1.05798	8.10578e-07
ENSG00000228150	-1.09444	2.98778e-09
ENSG00000227959	-1.07188	7.2787e-11
ENSG00000224621	-1.08519	2.47339e-06
ENSG00000233421	-2.01826	1.67285e-08
ENSG00000228549	-2.02684	2.08713e-10
ENSG00000272426	1.22164	0.00213785
ENSG00000235434	-1.93541	5.15153e-10
ENSG00000225986	-2.693	5.92516e-16
ENSG00000236936	1.45608	0.0141612
ENSG00000271420	-1.92646	4.45049e-23
ENSG00000232298	1.7646	0.000231914
ENSG00000236782	1.35679	4.45276e-08
ENSG00000227050	-1.19955	0.00192493
ENSG00000242125	1.17866	1.05637e-20
ENSG00000197989	1.08218	7.29566e-18
ENSG00000223382	-1.39316	0.000135963
ENSG00000224066	1.21042	1.30831e-06
ENSG00000233775	1.48743	0.0125772
ENSG00000116883	1.17809	3.2616e-08
ENSG00000273637	-1.24164	0.00154552
ENSG00000261798	1.67061	1.61642e-16
ENSG00000227857	1.38394	0.0115625
ENSG00000225506	1.95827	3.02061e-16
ENSG00000224805	1.0569	1.14674e-06
ENSG00000226252	-1.22466	3.40444e-05
ENSG00000225762	-1.83216	3.65159e-21
ENSG00000225028	-1.04129	0.00512677
ENSG00000203356	-1.11923	0.0028151
ENSG00000227070	-1.25864	7.07082e-15
ENSG00000235563	2.0666	9.1551e-09
ENSG00000230138	-1.83642	4.03075e-05
ENSG00000234810	-1.67838	0.0167122
ENSG00000234807	-1.7726	3.58297e-20
ENSG00000232453	-1.03455	1.93763e-09
ENSG00000237352	-1.18856	0.00592634
ENSG00000224609	1.08246	0.00787784
ENSG00000231816	1.47506	7.60329e-06
ENSG00000226476	3.3231	3.02121e-26
ENSG00000231252	2.84709	8.20386e-16
ENSG00000271200	1.84938	2.08653e-05
ENSG00000235545	-2.09357	1.22051e-21
ENSG00000230798	-3.43873	7.00873e-23
ENSG00000223949	1.53302	0.0102006
ENSG00000232284	-1.71664	5.51491e-21
ENSG00000269933	-1.87954	4.29965e-06
ENSG00000235079	-1.33483	3.68832e-06
ENSG00000234184	-2.77663	1.93034e-16
ENSG00000233008	-1.0324	0.000301227
ENSG00000180869	2.16373	3.50405e-15
ENSG00000236915	-2.0794	4.8708e-12
ENSG00000261737	-1.29736	1.80533e-24
ENSG00000267272	-2.24758	1.19805e-36
ENSG00000231999	-1.14261	2.98568e-10
ENSG00000272931	-1.05339	8.91004e-13
ENSG00000273487	-1.01396	0.000124402
ENSG00000235501	-1.58895	1.64842e-24
ENSG00000225206	-2.10088	0.00325129
ENSG00000224616	-1.34978	4.23497e-13
ENSG00000225938	-1.06958	4.87226e-05
ENSG00000260940	-1.22522	0.00450751
ENSG00000241720	-2.00519	7.20404e-07
ENSG00000259834	-2.95461	2.45867e-29
ENSG00000231346	-1.29101	6.68661e-06
ENSG00000231246	-2.63483	6.68069e-16
ENSG00000215866	2.53686	3.66824e-30
ENSG00000224167	2.16862	2.82509e-13
ENSG00000226419	1.41798	2.18599e-19
ENSG00000233730	-1.14246	0.00155611
ENSG00000228035	-1.49348	0.0152505
ENSG00000261662	-1.01417	9.60076e-11
ENSG00000227082	-2.09524	9.51795e-11
ENSG00000272583	-1.8208	1.17827e-05
ENSG00000277420	-1.42256	0.000319609
ENSG00000278811	1.00916	3.16234e-06
ENSG00000227733	-1.40825	1.9658e-07
ENSG00000233030	1.18355	0.0042541
ENSG00000250734	-1.60418	0.000547523
ENSG00000237975	-1.38337	6.74532e-07
ENSG00000238279	1.86417	7.33532e-19
ENSG00000228013	-2.46431	9.26054e-23
ENSG00000229780	1.19742	3.33131e-05
ENSG00000232519	1.26956	0.0066834
ENSG00000225670	-2.56878	2.07939e-23
ENSG00000224259	-1.92558	1.00031e-29
ENSG00000225279	-2.67771	3.64317e-12
ENSG00000203307	-1.61177	1.15139e-08
ENSG00000234142	1.4207	0.00154414
ENSG00000227907	-1.90102	4.40351e-19
ENSG00000272205	1.02916	7.25415e-09
ENSG00000233411	-1.54396	2.47263e-09
ENSG00000273160	-1.05629	0.000462635
ENSG00000241666	-1.69827	4.58466e-06
ENSG00000235736	1.25641	0.00253579
ENSG00000231407	-1.562	1.06782e-13
ENSG00000271811	2.10971	4.56309e-06
ENSG00000231424	-1.26393	0.0011311
ENSG00000203739	-1.98564	4.30306e-56
ENSG00000270084	-1.10744	7.74362e-17
ENSG00000234741	1.09823	2.45643e-15
ENSG00000224968	-4.65216	1.16364e-41
ENSG00000261250	-1.89867	2.69357e-09
ENSG00000229407	-2.43061	2.6553e-15
ENSG00000225982	-2.39383	6.8341e-10
ENSG00000228918	-2.12961	4.95837e-07
ENSG00000261729	-1.9559	1.07122e-12
ENSG00000237457	-3.73864	3.67851e-19
ENSG00000232498	3.39557	1.0821e-22
ENSG00000203721	1.85197	0.000677155
ENSG00000223774	-3.13105	1.95084e-13
ENSG00000249007	1.21726	7.581e-11
ENSG00000226862	-1.12345	9.68285e-05
ENSG00000231691	-1.68593	2.62785e-07
ENSG00000240710	-2.87373	3.803e-16
ENSG00000240219	-1.98621	8.73543e-16
ENSG00000226235	2.40953	5.90831e-05
ENSG00000281406	5.10028	7.59997e-74
ENSG00000237605	1.18035	0.00865895
ENSG00000203706	-1.35254	4.14641e-08
ENSG00000228792	1.21311	0.0082796
ENSG00000231057	1.29407	0.00798375
ENSG00000230461	1.48769	2.76206e-14
ENSG00000274895	1.76895	9.21778e-12
ENSG00000228063	-1.90962	7.23356e-06
ENSG00000221571	-1.29866	5.91843e-07
ENSG00000272823	-2.29418	6.40341e-11
ENSG00000238078	-2.29442	3.84432e-16
ENSG00000257551	-1.8743	8.02378e-06
ENSG00000238042	4.19787	5.25384e-18
ENSG00000232679	6.02168	1.01998e-37
ENSG00000232628	-2.0009	4.32428e-09
ENSG00000233384	2.83048	1.45439e-10
ENSG00000234476	-1.26212	0.00485266
ENSG00000227496	1.10607	0.000279837
ENSG00000225518	1.49447	5.7695e-16
ENSG00000228382	-1.26774	0.0180172
ENSG00000234277	1.85647	0.000252496
ENSG00000269934	-1.1429	0.000129542
ENSG00000244137	-2.19138	3.762e-15
ENSG00000223393	1.99375	9.947e-09
ENSG00000229228	-2.65727	2.72248e-20
ENSG00000231768	-2.65883	4.20791e-18
ENSG00000230628	1.20134	0.005364
ENSG00000227630	1.38441	4.51776e-14
ENSG00000280587	1.18279	1.58924e-06
ENSG00000233355	-1.42978	1.29396e-09
ENSG00000229960	3.87815	6.23251e-31
ENSG00000273175	-1.37804	0.00216424
ENSG00000260698	-1.12833	2.66408e-08
ENSG00000235021	-1.17305	4.60881e-05
ENSG00000235749	-2.6797	5.31735e-12
ENSG00000235688	-1.30944	0.00563707
ENSG00000228613	2.085	5.73807e-08
ENSG00000203635	3.30894	3.29742e-15
ENSG00000224885	1.78885	0.000921502
ENSG00000232044	-2.54204	9.21013e-08
ENSG00000235576	-1.69508	4.24672e-16
ENSG00000235092	-1.85571	4.49548e-34
ENSG00000260837	-1.20055	5.33211e-14
ENSG00000242136	2.19272	1.39318e-07
ENSG00000261104	2.28273	5.75318e-11
ENSG00000260476	3.65965	0.000170618
ENSG00000163009	1.98319	4.18165e-23
ENSG00000271952	-3.97909	3.09135e-27
ENSG00000224177	-1.66632	3.6643e-16
ENSG00000225649	-1.8597	2.67222e-07
ENSG00000233718	1.15027	0.00697276
ENSG00000226041	-1.85875	3.21287e-06
ENSG00000271991	1.75042	0.000197003
ENSG00000227210	1.93916	1.81815e-10
ENSG00000261012	-10.4208	0.000356747
ENSG00000224220	-2.76513	8.46478e-25
ENSG00000231636	-1.09155	0.00292671
ENSG00000272056	-1.53548	9.79374e-08
ENSG00000234945	1.18459	3.6807e-09
ENSG00000270210	-1.17822	3.59676e-08
ENSG00000260025	-1.55839	1.48061e-23
ENSG00000232973	-2.17426	4.61931e-27
ENSG00000231367	-2.12726	3.92251e-09
ENSG00000224739	1.14616	8.87397e-08
ENSG00000231826	1.54513	0.00087676
ENSG00000259439	1.72076	0.000216964
ENSG00000205054	1.48184	0.0037889
ENSG00000222005	-1.37282	0.00133922
ENSG00000233845	3.03193	4.48795e-15
ENSG00000225187	2.95603	4.22435e-27
ENSG00000234690	-2.45444	1.85684e-46
ENSG00000226087	-4.40869	1.08361e-49
ENSG00000240401	-1.36107	2.34274e-13
ENSG00000272180	-2.69106	1.12527e-11
ENSG00000233251	-1.40632	9.66181e-09
ENSG00000233723	-1.39225	0.000506799
ENSG00000212978	-1.14443	7.6916e-12
ENSG00000270820	-1.10843	4.85648e-37
ENSG00000236498	1.19832	1.34861e-06
ENSG00000237638	-2.18643	4.06745e-09
ENSG00000232613	-1.44537	6.85152e-11
ENSG00000232046	-2.17475	9.44427e-10
ENSG00000237179	-2.11668	6.5379e-05
ENSG00000230525	-1.87227	0.00532532
ENSG00000235885	-1.44106	0.0021785
ENSG00000236780	-1.76923	0.00011657
ENSG00000273064	1.13733	8.45262e-10
ENSG00000272702	2.06527	6.48296e-16
ENSG00000225439	-1.14775	3.70633e-08
ENSG00000237737	-1.1575	3.34781e-06
ENSG00000231172	6.08955	1.57943e-52
ENSG00000232504	-1.38249	0.000206175
ENSG00000272564	-1.32761	0.00114814
ENSG00000222041	1.20772	4.21402e-18
ENSG00000273445	-2.89021	1.48287e-21
ENSG00000240040	-2.35314	4.12008e-15
ENSG00000273305	-1.15819	5.49167e-05
ENSG00000230393	-3.0153	1.06528e-10
ENSG00000232034	1.20043	0.00368711
ENSG00000272902	-1.04152	1.73895e-13
ENSG00000234389	-1.28378	0.000161367
ENSG00000233639	-2.70517	1.8927e-08
ENSG00000235319	1.49949	0.000110761
ENSG00000225328	3.86332	2.66213e-21
ENSG00000204581	-1.58566	1.77601e-06
ENSG00000230499	1.46975	5.87373e-05
ENSG00000172965	1.29756	9.65922e-21
ENSG00000271590	1.60295	9.2702e-05
ENSG00000240350	1.07757	7.28535e-05
ENSG00000231943	-2.00338	1.81425e-07
ENSG00000233479	1.34791	0.00535754
ENSG00000235026	-5.33466	1.03245e-29
ENSG00000236255	1.25279	7.42896e-19
ENSG00000224789	3.95106	3.16455e-24
ENSG00000237614	1.83042	0.00432753
ENSG00000233221	2.65363	1.64848e-05
ENSG00000226953	-1.4604	2.73102e-05
ENSG00000231758	-3.78605	1.8964e-24
ENSG00000257277	-4.44118	3.9668e-36
ENSG00000238057	-1.10269	0.00014741
ENSG00000232606	-1.81103	0.000389887
ENSG00000224675	-1.17807	0.0160926
ENSG00000236841	2.63215	5.66678e-13
ENSG00000236107	-1.43424	0.0136928
ENSG00000228222	-3.56874	4.88308e-27
ENSG00000235321	-3.45396	2.52794e-17
ENSG00000213981	4.17293	3.54148e-16
ENSG00000222033	2.06876	8.5326e-19
ENSG00000234350	1.7698	1.95643e-11
ENSG00000239467	1.55683	1.58947e-14
ENSG00000232555	1.31938	5.34505e-08
ENSG00000238133	1.96168	9.40691e-10
ENSG00000270460	2.13982	4.74658e-20
ENSG00000271151	1.09057	2.49109e-07
ENSG00000272729	-2.19809	2.78664e-14
ENSG00000224189	-2.69146	2.7716e-32
ENSG00000272551	-1.26459	0.000608299
ENSG00000229941	-1.33255	0.012276
ENSG00000234663	-1.464	3.06176e-08
ENSG00000226747	1.34593	5.5332e-05
ENSG00000224063	-1.29218	8.40909e-05
ENSG00000227542	1.71786	4.71653e-23
ENSG00000233766	-1.39774	0.00810461
ENSG00000224099	4.60942	1.05151e-23
ENSG00000229056	-1.78973	1.11874e-15
ENSG00000231621	-1.66643	2.607e-05
ENSG00000236653	-1.92634	4.73555e-05
ENSG00000225421	-1.82712	2.75826e-08
ENSG00000225953	-1.90193	1.01059e-14
ENSG00000230408	1.60614	0.0193569
ENSG00000225216	-1.50487	0.00131727
ENSG00000229647	1.6088	2.16363e-05
ENSG00000224137	-1.53285	6.70274e-06
ENSG00000244567	-1.05186	5.58301e-14
ENSG00000225111	-2.38422	2.9487e-20
ENSG00000270659	-1.00465	7.68446e-05
ENSG00000230838	4.98093	3.93769e-36
ENSG00000223923	-2.19683	1.31734e-06
ENSG00000225062	1.12637	0.000108586
ENSG00000272555	-1.20921	0.00013215
ENSG00000272644	-1.45353	9.6944e-24
ENSG00000234638	-2.43809	4.98604e-07
ENSG00000268603	-1.01281	1.5964e-06
ENSG00000268896	1.62213	0.00421071
ENSG00000227308	1.9652	0.0150243
ENSG00000272944	-2.13656	3.46333e-17
ENSG00000267034	-1.92762	2.1916e-07
ENSG00000234193	1.11791	0.00675636
ENSG00000232023	2.91886	1.08056e-09
ENSG00000226125	-1.53542	1.76519e-07
ENSG00000232520	-2.35388	3.74682e-10
ENSG00000238062	1.93853	3.36362e-15
ENSG00000261829	-1.36247	7.71646e-11
ENSG00000237126	-1.21765	6.78914e-22
ENSG00000259793	-1.27291	2.39601e-05
ENSG00000235726	1.26912	6.74743e-08
ENSG00000222022	2.08197	0.0016055
ENSG00000222032	2.38513	9.59125e-05
ENSG00000186235	-1.53741	9.48218e-11
ENSG00000196758	2.589	0.00868527
ENSG00000218416	-2.20168	7.40875e-17
ENSG00000260942	1.04891	9.93968e-21
ENSG00000273113	1.12971	7.35413e-05
ENSG00000215023	-1.00181	0.0001214
ENSG00000224272	-1.67036	2.06722e-18
ENSG00000224318	-3.07489	1.76183e-19
ENSG00000224957	-2.28109	8.13621e-11
ENSG00000224239	-1.44653	0.00491141
ENSG00000235947	1.7471	6.88785e-05
ENSG00000233912	-1.46306	5.57911e-13
ENSG00000189229	-1.0379	0.00311348
ENSG00000227110	1.36351	2.61009e-10
ENSG00000228723	1.96202	0.000321672
ENSG00000251576	1.62973	0.00180346
ENSG00000272498	-1.1885	4.0856e-10
ENSG00000228956	-1.06707	6.82783e-05
ENSG00000272511	-2.77759	1.00449e-15
ENSG00000228791	-2.16811	1.81214e-17
ENSG00000271943	-1.21859	0.00122392
ENSG00000228214	-2.05037	6.11061e-11
ENSG00000235904	-2.87728	2.1007e-18
ENSG00000227260	-3.49712	1.16032e-21
ENSG00000226320	5.06419	9.73911e-43
ENSG00000236452	5.68143	2.82832e-75
ENSG00000279727	-2.58734	1.44977e-19
ENSG00000232354	-1.03551	6.72589e-08
ENSG00000230084	-1.29414	5.40932e-06
ENSG00000230970	-2.39322	2.4187e-07
ENSG00000173811	-1.68805	3.468e-15
ENSG00000225611	-1.60388	2.64717e-08
ENSG00000235288	-1.49607	0.00691095
ENSG00000273328	-2.28131	3.4932e-14
ENSG00000271941	-1.4604	2.96709e-12
ENSG00000234617	-1.76813	2.99995e-08
ENSG00000261786	-1.82266	5.42763e-09
ENSG00000225873	-1.67202	5.40337e-10
ENSG00000268324	1.43519	0.000197954
ENSG00000230454	1.35398	9.0572e-13
ENSG00000243224	1.12481	2.50164e-10
ENSG00000244586	1.0626	1.28363e-06
ENSG00000272202	2.37837	2.35988e-09
ENSG00000272360	-1.13138	0.000238087
ENSG00000243384	-1.20512	0.00138217
ENSG00000244342	2.72916	2.09637e-07
ENSG00000239653	-1.01501	1.60743e-07
ENSG00000241111	-1.47393	0.0202521
ENSG00000244564	1.55512	0.0117836
ENSG00000241158	-3.62758	2.72453e-31
ENSG00000241684	-3.34907	1.00713e-34
ENSG00000241316	-1.52569	4.57444e-21
ENSG00000277855	-1.4313	0.000265766
ENSG00000241163	-1.57331	7.63192e-12
ENSG00000261292	-4.06644	2.92979e-10
ENSG00000239445	-1.48086	8.54714e-08
ENSG00000273374	2.03212	1.00838e-15
ENSG00000242759	-1.68864	7.32648e-08
ENSG00000243701	-1.03568	8.05469e-08
ENSG00000239828	-1.40327	0.00023929
ENSG00000273125	-1.40506	0.00321948
ENSG00000271856	-1.92256	2.05711e-11
ENSG00000241224	-2.59642	3.33486e-25
ENSG00000214381	-3.07375	2.54437e-12
ENSG00000206532	-1.20616	5.11611e-05
ENSG00000243081	-1.31537	9.14484e-07
ENSG00000272844	1.06295	0.00276291
ENSG00000239268	-3.27806	2.33083e-14
ENSG00000240661	3.04555	1.38954e-06
ENSG00000273123	-1.25492	0.0015465
ENSG00000246022	-1.24215	0.000645987
ENSG00000250934	-1.83573	1.96445e-05
ENSG00000244300	2.37343	6.87836e-21
ENSG00000248243	1.10369	4.79091e-09
ENSG00000249993	-2.1313	0.000294363
ENSG00000243832	-4.32244	2.20182e-35
ENSG00000239641	-1.1921	0.0175245
ENSG00000243818	-1.52998	0.0195829
ENSG00000240541	1.25621	2.10362e-06
ENSG00000243885	2.0414	1.05331e-05
ENSG00000243944	4.98508	5.53296e-27
ENSG00000242908	1.26932	0.0119711
ENSG00000250271	2.0696	8.27326e-06
ENSG00000239941	-1.37934	0.0148579
ENSG00000229619	-2.50067	2.35938e-30
ENSG00000243069	-2.52953	2.09342e-13
ENSG00000214919	1.80901	1.7522e-05
ENSG00000240875	-1.2773	1.56908e-09
ENSG00000243629	1.47703	1.35107e-09
ENSG00000241544	1.99234	0.00533285
ENSG00000240207	-1.01704	1.23593e-08
ENSG00000244040	-1.53698	5.0663e-06
ENSG00000239205	-4.99621	1.02263e-45
ENSG00000270141	1.61107	0.00544198
ENSG00000239219	-1.16727	0.000144571
ENSG00000231310	2.23297	1.74493e-05
ENSG00000203645	-1.32994	2.79858e-08
ENSG00000223941	-2.47433	4.16238e-06
ENSG00000237978	2.54219	1.97046e-07
ENSG00000242808	-1.11181	0.00115051
ENSG00000238837	-2.99255	4.73412e-13
ENSG00000230215	1.28167	0.00108104
ENSG00000232233	1.99869	1.09311e-05
ENSG00000224049	2.53834	0.00458704
ENSG00000270959	-1.08836	1.15287e-26
ENSG00000233308	-2.94013	7.11483e-17
ENSG00000229155	-2.15052	1.69323e-34
ENSG00000214145	1.44557	0.000840322
ENSG00000230266	-1.27372	7.92402e-07
ENSG00000228109	1.83454	1.20628e-27
ENSG00000227375	-1.81775	7.30023e-14
ENSG00000272989	-1.67472	1.136e-21
ENSG00000272927	-1.40425	2.42677e-06
ENSG00000251652	-1.56034	0.00337668
ENSG00000273179	1.36472	1.24232e-12
ENSG00000270195	1.27792	1.21188e-13
ENSG00000206113	-1.55195	9.96096e-10
ENSG00000216560	-3.78276	1.39555e-14
ENSG00000249896	-1.97834	1.96193e-06
ENSG00000245468	-2.06838	2.15663e-26
ENSG00000272620	2.02226	8.22242e-08
ENSG00000273267	1.04422	0.0104585
ENSG00000251615	-1.73709	5.89099e-30
ENSG00000250413	-2.106	2.40911e-15
ENSG00000249631	-1.88975	2.11765e-12
ENSG00000247624	-1.01191	0.0095755
ENSG00000250137	-4.18494	6.40946e-27
ENSG00000251292	-3.20246	6.65652e-19
ENSG00000249453	-4.68311	4.13367e-35
ENSG00000249699	-2.49522	5.18252e-08
ENSG00000261761	-3.39495	2.33269e-25
ENSG00000248936	-1.26486	4.42619e-10
ENSG00000249534	1.16506	0.0187023
ENSG00000250906	1.05094	0.00466259
ENSG00000245870	-4.79664	1.63743e-42
ENSG00000260519	-1.30936	0.000398277
ENSG00000260878	-2.70982	2.98018e-16
ENSG00000260918	-1.68693	1.94434e-07
ENSG00000249341	-1.3584	0.00396465
ENSG00000249706	-1.89978	7.86356e-08
ENSG00000245067	1.62121	0.00141066
ENSG00000249413	2.46811	0.00512549
ENSG00000249942	3.40501	0.000124736
ENSG00000251331	-1.33502	0.00181885
ENSG00000180769	-1.12977	1.20663e-13
ENSG00000261496	-2.96933	7.43542e-22
ENSG00000270720	1.14307	3.43252e-09
ENSG00000251095	2.44591	0.000127414
ENSG00000271474	-1.95266	3.00721e-26
ENSG00000260641	1.08705	1.03546e-06
ENSG00000246090	-1.2923	1.74621e-21
ENSG00000248161	-1.29054	2.14785e-11
ENSG00000250920	6.61793	1.39488e-06
ENSG00000249885	1.16687	0.000918747
ENSG00000245293	-1.32664	2.58193e-06
ENSG00000232021	2.27982	2.45204e-20
ENSG00000234492	-1.16258	3.78849e-06
ENSG00000250950	1.49924	0.00155983
ENSG00000227145	-1.34887	0.00635872
ENSG00000251526	1.67089	0.00424471
ENSG00000248187	1.30615	0.0165579
ENSG00000250033	1.93451	8.95894e-08
ENSG00000273472	-1.673	5.62917e-16
ENSG00000245112	1.16109	0.00850865
ENSG00000248890	-1.41607	6.36078e-14
ENSG00000260303	-1.83362	9.80779e-05
ENSG00000249752	-1.8987	4.068e-05
ENSG00000250252	-2.14324	3.72013e-05
ENSG00000234828	-3.07007	2.32841e-24
ENSG00000249690	-3.65176	5.47623e-14
ENSG00000270265	-1.88307	1.73438e-16
ENSG00000251603	-1.12964	5.9678e-10
ENSG00000245954	-1.15265	6.14361e-05
ENSG00000248571	-1.9443	8.215e-09
ENSG00000250538	-3.70003	3.74871e-25
ENSG00000260244	-1.34897	6.25932e-09
ENSG00000248771	-1.45966	3.48573e-10
ENSG00000250266	-1.94225	5.18222e-12
ENSG00000251061	-1.25131	0.00470604
ENSG00000237125	-4.55868	3.82301e-42
ENSG00000261672	-2.96539	2.30342e-07
ENSG00000248174	-3.2636	1.94662e-15
ENSG00000250596	-2.74903	6.13462e-23
ENSG00000251584	-1.77428	6.4603e-11
ENSG00000177822	2.46661	3.69094e-08
ENSG00000272784	-1.49742	0.00294923
ENSG00000249096	-2.0109	2.58281e-21
ENSG00000271538	-2.02516	1.75957e-11
ENSG00000251230	1.08885	0.00569224
ENSG00000249679	-1.1202	0.000121254
ENSG00000235902	-1.62457	0.000384232
ENSG00000251165	-1.4026	0.00494645
ENSG00000281591	1.66395	0.00230992
ENSG00000249430	-1.48046	0.00445223
ENSG00000188242	-2.93958	5.52648e-29
ENSG00000225138	1.34595	2.58163e-08
ENSG00000250385	-2.48622	1.35584e-06
ENSG00000249650	3.60252	2.38609e-14
ENSG00000215246	-1.04318	2.20034e-06
ENSG00000272347	1.07703	4.63515e-05
ENSG00000250584	3.78779	6.58315e-14
ENSG00000248994	-2.35538	7.59905e-08
ENSG00000250490	-1.35763	1.86186e-07
ENSG00000250056	-2.45447	1.60929e-09
ENSG00000248968	1.8622	0.000224152
ENSG00000271715	-1.95457	2.81708e-11
ENSG00000249937	3.836	6.99868e-12
ENSG00000248693	1.37834	0.00212848
ENSG00000248874	-2.2895	2.86968e-08
ENSG00000250337	2.5544	1.83177e-06
ENSG00000250155	-1.37122	2.10331e-07
ENSG00000248587	-2.11915	1.70625e-10
ENSG00000244968	-2.28743	8.16683e-19
ENSG00000250629	-2.22065	3.08657e-05
ENSG00000248464	-1.76342	8.46699e-06
ENSG00000251141	-1.40632	7.33928e-10
ENSG00000250360	-2.1899	3.49534e-06
ENSG00000259663	-1.18646	0.00041956
ENSG00000240535	-1.49632	0.000149504
ENSG00000251307	2.05787	2.10252e-19
ENSG00000227908	-1.60493	4.47224e-14
ENSG00000235635	-1.32762	0.0058178
ENSG00000250961	-3.64262	9.20282e-18
ENSG00000249279	-3.3131	7.15968e-29
ENSG00000178722	-2.04414	1.43153e-06
ENSG00000250081	1.44333	4.79109e-05
ENSG00000250978	-3.245	8.21771e-15
ENSG00000248359	1.23821	0.000825361
ENSG00000249352	1.22013	0.00724735
ENSG00000250237	1.37029	0.00446809
ENSG00000261269	-1.15016	1.67613e-16
ENSG00000251599	-3.21398	7.65211e-15
ENSG00000249743	3.05539	5.13096e-10
ENSG00000249856	-1.52586	0.0219848
ENSG00000250889	-1.47847	3.21219e-07
ENSG00000250320	-2.75154	7.98088e-44
ENSG00000245526	-3.47725	2.06432e-19
ENSG00000248309	-3.28526	1.41141e-32
ENSG00000260871	-1.15596	1.38685e-05
ENSG00000248323	2.96539	8.68076e-13
ENSG00000249180	1.10938	0.0192265
ENSG00000251026	6.3936	8.60764e-59
ENSG00000249476	-1.18195	2.80294e-06
ENSG00000271849	-1.35702	6.84997e-10
ENSG00000278921	-1.83724	2.07545e-23
ENSG00000271797	-1.71835	1.6225e-25
ENSG00000249249	-1.17492	1.0181e-12
ENSG00000248445	-1.46677	1.85494e-18
ENSG00000249167	-3.23887	1.71554e-26
ENSG00000248663	-1.23479	4.81549e-12
ENSG00000249797	-3.29545	4.1913e-17
ENSG00000260686	-1.31701	1.73082e-16
ENSG00000250602	-1.05757	2.08697e-06
ENSG00000230561	1.19804	1.78104e-09
ENSG00000233006	-1.14756	1.28041e-19
ENSG00000230612	1.11999	0.000507426
ENSG00000273345	1.07114	0.000112808
ENSG00000224186	1.37277	3.21925e-18
ENSG00000277619	1.00625	0.00231623
ENSG00000249082	-1.7814	2.72444e-17
ENSG00000271824	-2.61837	1.2952e-18
ENSG00000248211	-2.6449	6.53286e-26
ENSG00000250159	-1.94382	7.98185e-09
ENSG00000281398	1.58592	7.87351e-24
ENSG00000249526	1.4932	0.00967335
ENSG00000272108	-1.26298	1.08378e-05
ENSG00000231185	3.03663	6.11461e-26
ENSG00000236714	1.85621	0.000398517
ENSG00000250343	-2.53085	9.43891e-05
ENSG00000250072	2.42901	3.44661e-09
ENSG00000249669	-2.26777	7.80432e-15
ENSG00000269936	-1.67889	5.17499e-11
ENSG00000249035	2.5488	1.23019e-07
ENSG00000245812	-1.12347	3.29436e-07
ENSG00000253687	1.53883	0.00936754
ENSG00000253978	-1.09639	0.00286788
ENSG00000254192	-2.19268	6.37306e-14
ENSG00000254042	-3.20539	3.6074e-35
ENSG00000250274	1.60347	1.31781e-06
ENSG00000253647	-2.62413	8.56779e-07
ENSG00000253348	1.25403	0.0071109
ENSG00000253736	-2.18749	2.77053e-10
ENSG00000253428	2.49972	7.02896e-07
ENSG00000253686	1.64552	2.51556e-08
ENSG00000254211	2.55479	1.94475e-09
ENSG00000249306	4.31415	1.08147e-23
ENSG00000248596	-1.95392	7.60794e-16
ENSG00000246334	2.40474	1.28541e-33
ENSG00000249849	-2.23914	3.60302e-07
ENSG00000254035	-1.45937	1.81187e-06
ENSG00000253163	2.05947	1.21522e-07
ENSG00000272463	-2.35813	1.35318e-40
ENSG00000271911	-1.06727	0.0192346
ENSG00000281809	-1.98911	3.77447e-08
ENSG00000261730	-2.53091	5.36428e-21
ENSG00000272279	-1.56095	2.6512e-07
ENSG00000272320	-1.27599	3.83003e-07
ENSG00000260604	3.33622	1.45689e-10
ENSG00000234817	-2.13872	8.19303e-25
ENSG00000269985	1.66936	0.00612991
ENSG00000233064	1.96917	8.0851e-07
ENSG00000216863	-1.83073	4.47434e-06
ENSG00000226281	-1.71766	2.34498e-10
ENSG00000251164	4.17739	1.42684e-09
ENSG00000229950	3.27808	1.52365e-23
ENSG00000247925	-2.26751	1.82468e-08
ENSG00000234427	-1.49132	0.00599715
ENSG00000227803	-1.75235	6.3389e-06
ENSG00000272168	1.06056	7.65352e-08
ENSG00000272053	-1.85173	1.43433e-08
ENSG00000272462	-1.20495	1.78435e-17
ENSG00000281706	1.16018	1.04258e-19
ENSG00000225173	2.71413	1.4484e-13
ENSG00000229274	-3.36661	5.8393e-24
ENSG00000272501	-1.13272	8.16112e-18
ENSG00000272221	-1.48512	3.27064e-30
ENSG00000281756	2.79822	1.88431e-16
ENSG00000277427	-1.68864	0.0173
ENSG00000225914	-1.50397	0.0122667
ENSG00000228962	-3.22022	1.24387e-23
ENSG00000249346	-3.02171	1.00948e-19
ENSG00000233183	-1.46819	0.000370979
ENSG00000235033	-1.11404	1.07806e-05
ENSG00000234753	2.26593	1.83638e-66
ENSG00000226917	1.92143	0.000292322
ENSG00000272170	1.05907	1.42761e-05
ENSG00000271754	1.16881	9.54428e-07
ENSG00000237686	4.37612	4.49244e-49
ENSG00000231881	2.61705	8.59636e-06
ENSG00000231683	1.7616	0.000173283
ENSG00000235899	1.21629	0.00262778
ENSG00000235050	-2.48	0.00118507
ENSG00000224984	-2.21065	1.43379e-22
ENSG00000266680	-2.03532	1.71415e-25
ENSG00000236345	3.02366	2.53186e-13
ENSG00000230910	-3.264	4.70895e-23
ENSG00000237643	2.2652	4.52725e-09
ENSG00000233237	-2.20956	3.9046e-12
ENSG00000234155	-1.00288	6.04385e-07
ENSG00000203808	-3.35205	2.59673e-20
ENSG00000235142	-2.03064	2.76702e-13
ENSG00000272476	1.05471	4.04791e-12
ENSG00000260273	-1.62158	2.12409e-19
ENSG00000255389	-1.1642	3.48351e-13
ENSG00000270661	1.61369	0.0137251
ENSG00000236347	3.19581	4.40993e-13
ENSG00000230943	-1.5171	3.23e-08
ENSG00000227502	-1.58531	2.59085e-20
ENSG00000175967	-1.11055	0.00736049
ENSG00000272472	-1.27733	0.0216931
ENSG00000236548	-1.32337	3.20942e-05
ENSG00000237742	-1.2635	0.00502785
ENSG00000236166	-1.10533	4.6153e-05
ENSG00000228495	-3.02621	5.13694e-34
ENSG00000227954	-2.44684	1.68086e-33
ENSG00000236700	1.72503	0.000189728
ENSG00000262543	-3.75558	9.53029e-19
ENSG00000226571	-2.22836	3.09212e-07
ENSG00000238099	-1.89972	0.012261
ENSG00000235652	-1.30942	5.19598e-16
ENSG00000236591	-1.5714	0.000760464
ENSG00000273132	4.44265	6.09907e-33
ENSG00000268592	1.88682	2.87996e-09
ENSG00000271913	-1.10412	1.35017e-12
ENSG00000233682	1.64782	3.85037e-08
ENSG00000230234	5.27755	7.86064e-19
ENSG00000223414	-1.69342	1.98039e-05
ENSG00000231720	2.44704	1.43005e-06
ENSG00000228648	2.33741	1.26486e-07
ENSG00000203688	1.61922	5.97187e-13
ENSG00000146521	1.18411	3.98025e-07
ENSG00000269155	1.14263	3.79875e-08
ENSG00000223485	3.40761	2.97766e-22
ENSG00000261039	2.63339	2.67652e-07
ENSG00000226194	1.41414	1.89055e-05
ENSG00000271820	-2.58757	1.382e-10
ENSG00000227508	-2.55766	3.14765e-19
ENSG00000261003	-1.48819	0.0004519
ENSG00000242611	-2.82477	1.58226e-27
ENSG00000261795	-2.16468	5.95622e-11
ENSG00000248767	-2.62353	1.69365e-09
ENSG00000230487	-1.21571	2.8283e-19
ENSG00000236081	4.96268	2.39162e-119
ENSG00000236708	-2.03113	6.7261e-08
ENSG00000241269	1.19854	8.6944e-11
ENSG00000188365	1.31103	8.63349e-09
ENSG00000234432	1.27308	6.89491e-20
ENSG00000229970	4.76051	4.22771e-42
ENSG00000272328	4.60773	1.87929e-38
ENSG00000225606	-1.30464	4.70426e-05
ENSG00000237070	-2.2283	3.02318e-13
ENSG00000229108	-1.59968	0.000331242
ENSG00000235837	1.61649	1.75269e-10
ENSG00000236039	-1.12284	0.00108552
ENSG00000226598	-1.08554	0.00247729
ENSG00000232759	-1.19878	1.76689e-05
ENSG00000226816	-1.20113	1.27985e-05
ENSG00000223561	-1.51761	2.34802e-10
ENSG00000270933	1.85204	5.09621e-23
ENSG00000233760	-3.5982	1.02296e-34
ENSG00000233429	-1.00732	4.28965e-15
ENSG00000272801	-1.32605	0.00013579
ENSG00000253308	2.78258	0.000344121
ENSG00000253405	2.82108	9.06593e-06
ENSG00000234336	-2.51925	6.26607e-12
ENSG00000272568	-1.26974	3.30006e-05
ENSG00000235669	3.29989	3.92972e-15
ENSG00000231519	1.37997	0.00296605
ENSG00000197085	4.52997	2.72311e-27
ENSG00000227544	-1.67811	5.55961e-08
ENSG00000272908	-1.13664	3.12528e-09
ENSG00000281103	-1.63163	1.0958e-20
ENSG00000227172	1.62715	4.1804e-05
ENSG00000228554	1.24232	2.17445e-06
ENSG00000203446	3.28265	6.0949e-18
ENSG00000224116	1.93172	1.0668e-08
ENSG00000234183	1.49775	0.00751007
ENSG00000232956	1.69645	2.63662e-53
ENSG00000223829	-3.10314	1.62421e-20
ENSG00000146666	1.33031	3.27799e-07
ENSG00000226122	1.72133	0.000544133
ENSG00000224223	-3.96356	4.24694e-26
ENSG00000224057	-1.32268	0.000301198
ENSG00000260653	-1.1769	0.00879243
ENSG00000189316	-1.38198	1.92656e-06
ENSG00000272843	1.21313	0.000499844
ENSG00000274080	4.1225	4.61431e-35
ENSG00000225969	-1.52445	4.1158e-19
ENSG00000273069	1.27411	0.00670987
ENSG00000232729	1.01676	0.00498759
ENSG00000232756	-2.20891	6.69374e-24
ENSG00000234456	-1.58683	4.00246e-20
ENSG00000182165	-1.40262	3.27602e-17
ENSG00000228113	-2.42435	1.46494e-24
ENSG00000227646	2.03597	0.00729626
ENSG00000231170	-1.40198	1.72489e-10
ENSG00000231764	1.55404	0.00107602
ENSG00000235077	-1.04115	0.000479064
ENSG00000236305	2.06801	4.59851e-35
ENSG00000274993	-1.49696	3.53262e-11
ENSG00000232445	2.51337	6.04078e-35
ENSG00000259294	1.82798	0.000512826
ENSG00000225329	-1.54759	3.01935e-07
ENSG00000237513	-2.29458	2.22996e-22
ENSG00000272918	-1.04888	5.76843e-07
ENSG00000228742	6.3222	7.08389e-63
ENSG00000233705	-2.10787	2.71051e-10
ENSG00000228540	1.9019	0.000469583
ENSG00000214188	1.83923	4.14814e-08
ENSG00000230316	7.39726	2.49769e-34
ENSG00000272686	-1.41576	6.09966e-21
ENSG00000240758	1.69219	9.53418e-08
ENSG00000272899	1.87773	1.26928e-27
ENSG00000242078	2.2089	3.08696e-07
ENSG00000270823	1.73044	1.73199e-09
ENSG00000233559	1.59579	6.40912e-10
ENSG00000226380	1.72583	5.1545e-21
ENSG00000271204	1.25875	0.000199089
ENSG00000273319	1.1853	3.81082e-05
ENSG00000273489	1.32196	2.74281e-06
ENSG00000232053	-1.7647	0.000123989
ENSG00000273391	1.03707	2.9112e-09
ENSG00000241657	-1.04483	0.000417241
ENSG00000272619	1.23488	0.00982168
ENSG00000244479	-1.36143	4.44236e-15
ENSG00000230746	-2.39878	0.016986
ENSG00000239377	1.3115	8.79034e-06
ENSG00000242258	-1.70083	1.59324e-18
ENSG00000244151	1.44197	1.58251e-13
ENSG00000243836	-1.31916	6.48478e-10
ENSG00000239911	-1.20967	2.1652e-10
ENSG00000229591	1.03946	0.00147498
ENSG00000204876	3.07264	3.08984e-21
ENSG00000224903	2.01185	1.75091e-13
ENSG00000243479	1.9819	3.4276e-42
ENSG00000231419	-2.05274	1.41227e-12
ENSG00000253696	-1.6415	2.22548e-23
ENSG00000254319	-1.90485	1.14243e-09
ENSG00000253853	-1.16012	0.00126987
ENSG00000271743	-2.01251	7.79104e-15
ENSG00000249898	-1.52927	5.1953e-30
ENSG00000253426	2.01432	1.33375e-14
ENSG00000279949	2.02302	0.000563147
ENSG00000248538	3.34937	8.15027e-17
ENSG00000254237	-2.63083	8.7813e-06
ENSG00000253649	1.23838	9.87464e-05
ENSG00000269918	-1.19792	1.23058e-08
ENSG00000255310	-1.36738	6.6907e-10
ENSG00000255354	-3.01445	4.10678e-10
ENSG00000269899	1.24444	1.57351e-12
ENSG00000255495	-1.51269	4.9738e-12
ENSG00000251034	-1.11292	5.86005e-12
ENSG00000261026	-1.20944	0.000577848
ENSG00000245025	-1.835	1.9453e-20
ENSG00000253616	2.87254	1.76345e-26
ENSG00000253390	-1.55966	9.6502e-08
ENSG00000253986	-1.24408	2.43578e-05
ENSG00000253535	-1.08725	0.000162996
ENSG00000272163	-1.69812	0.000803164
ENSG00000253888	-1.75836	0.00224044
ENSG00000253690	-1.72538	0.000767243
ENSG00000246339	1.75291	8.32404e-14
ENSG00000253632	1.65666	0.00179192
ENSG00000253490	1.24168	0.0047899
ENSG00000254109	1.41624	9.61436e-09
ENSG00000254302	-1.88019	2.29539e-05
ENSG00000253123	-1.67019	3.81854e-15
ENSG00000253746	2.84197	5.90268e-17
ENSG00000253161	2.91792	8.48386e-36
ENSG00000253414	3.06437	2.17297e-35
ENSG00000254111	1.09403	0.00419561
ENSG00000253361	1.37959	0.00335019
ENSG00000253665	-2.15246	5.11237e-08
ENSG00000254143	-2.07444	2.14223e-07
ENSG00000253408	-1.24911	0.0152142
ENSG00000255366	-2.28347	1.0106e-16
ENSG00000253608	-2.26859	3.88227e-09
ENSG00000253688	-1.5986	0.000300487
ENSG00000253844	2.54925	2.08154e-10
ENSG00000254204	-2.24417	6.89658e-07
ENSG00000237807	-1.90076	4.35039e-19
ENSG00000260955	1.05074	0.0167986
ENSG00000254142	4.13626	5.09304e-18
ENSG00000254139	-3.08526	5.82333e-12
ENSG00000205293	3.69863	7.20494e-05
ENSG00000167912	-1.81223	9.54434e-18
ENSG00000254869	1.83409	0.000771712
ENSG00000274956	-4.70218	1.23927e-42
ENSG00000253734	-2.66803	0.00397441
ENSG00000246145	-1.71957	4.23801e-11
ENSG00000246528	1.57149	8.65065e-09
ENSG00000253967	-1.77804	0.000229576
ENSG00000260838	-2.78555	2.28732e-19
ENSG00000260398	-1.72723	1.86651e-07
ENSG00000249328	1.29787	0.0144774
ENSG00000272264	-1.32683	1.75845e-12
ENSG00000254162	-1.16908	1.2441e-07
ENSG00000260317	-1.34405	3.45833e-10
ENSG00000253214	-2.11098	1.01891e-11
ENSG00000260493	1.08357	0.00448206
ENSG00000254208	2.19997	2.40619e-06
ENSG00000253549	-3.58228	6.27816e-49
ENSG00000253177	-2.50036	5.45517e-11
ENSG00000264448	2.19657	6.38217e-07
ENSG00000245080	-3.27052	2.87843e-31
ENSG00000254248	-3.02835	8.93834e-19
ENSG00000253773	1.34812	2.44702e-05
ENSG00000253105	-1.95027	1.21787e-10
ENSG00000245970	1.03196	7.22442e-19
ENSG00000272321	-2.29337	4.91377e-09
ENSG00000253217	-1.23667	0.00059962
ENSG00000253282	-2.8068	1.62552e-06
ENSG00000254024	1.66614	0.000803526
ENSG00000266289	1.38947	2.2489e-05
ENSG00000261670	1.31144	0.00862492
ENSG00000254041	-1.98127	0.00156751
ENSG00000253582	-1.49048	1.5192e-11
ENSG00000272502	2.131	9.69882e-39
ENSG00000255325	2.43145	0.00472867
ENSG00000249816	-2.25225	2.12661e-10
ENSG00000245164	-1.26497	2.93023e-08
ENSG00000253438	1.91644	3.18701e-11
ENSG00000254166	4.35986	8.36987e-40
ENSG00000247844	4.48349	1.28358e-72
ENSG00000246228	2.43128	2.01608e-22
ENSG00000253929	5.91806	1.94724e-72
ENSG00000280997	3.08084	3.3982e-08
ENSG00000249375	1.23968	1.42287e-06
ENSG00000249859	2.36748	3.39153e-68
ENSG00000261220	1.66227	8.14237e-13
ENSG00000272456	-1.56259	0.000796974
ENSG00000254101	-1.64107	0.00472509
ENSG00000253288	-2.53078	1.56976e-05
ENSG00000253988	-1.63006	2.2777e-07
ENSG00000253307	2.08061	3.40055e-11
ENSG00000253595	-1.49301	0.0157062
ENSG00000244998	3.17046	2.24938e-12
ENSG00000271959	1.96031	5.36279e-09
ENSG00000253716	1.20251	2.01883e-20
ENSG00000254389	1.55862	4.87169e-15
ENSG00000254859	-1.09407	2.57398e-06
ENSG00000255050	1.83869	1.69369e-10
ENSG00000254548	3.97924	1.04442e-19
ENSG00000203499	2.57348	2.74183e-63
ENSG00000254973	2.25302	1.86604e-31
ENSG00000214733	2.19661	2.99073e-11
ENSG00000204791	1.48612	2.136e-10
ENSG00000265393	1.04757	1.79388e-06
ENSG00000254533	-2.91464	6.98038e-20
ENSG00000277631	-1.63636	0.000895758
ENSG00000281769	-2.94189	6.81504e-12
ENSG00000236404	-1.86212	2.09086e-10
ENSG00000272866	-1.29368	0.00148321
ENSG00000270372	4.1643	0.00581193
ENSG00000235448	1.13827	0.00942143
ENSG00000270547	1.35768	5.32377e-07
ENSG00000225472	-1.99317	1.27934e-07
ENSG00000272871	-1.06426	4.12246e-07
ENSG00000234779	-1.97829	1.07524e-07
ENSG00000261402	2.67431	0.00796592
ENSG00000227071	1.47698	5.62425e-06
ENSG00000171889	3.08446	0.0145024
ENSG00000265194	1.3873	8.45314e-10
ENSG00000240498	-5.62617	1.49254e-89
ENSG00000234840	-2.20921	1.13938e-08
ENSG00000260390	-1.32716	1.2798e-05
ENSG00000260412	-1.31648	0.0111559
ENSG00000233554	-1.81679	8.59412e-39
ENSG00000281128	-2.10841	5.95693e-05
ENSG00000260947	-3.53058	3.09148e-27
ENSG00000233776	-1.71432	2.40379e-05
ENSG00000235481	1.1016	6.17564e-05
ENSG00000237159	-2.09599	0.000332587
ENSG00000230074	-1.02298	5.20669e-10
ENSG00000281205	-1.23538	1.13854e-11
ENSG00000235387	-1.35874	2.77135e-24
ENSG00000231518	-1.29988	1.68707e-06
ENSG00000250850	-1.9642	0.0027619
ENSG00000204860	1.01546	8.0215e-14
ENSG00000240240	-2.54572	1.44767e-16
ENSG00000223839	-2.36807	5.53505e-10
ENSG00000235659	-1.88577	5.26628e-08
ENSG00000224958	-5.09764	7.55005e-40
ENSG00000229019	-2.37494	2.34907e-07
ENSG00000261447	-1.75347	1.45976e-05
ENSG00000204706	-1.69146	9.42359e-14
ENSG00000235523	-1.89602	1.77706e-08
ENSG00000236849	-1.14958	0.0100126
ENSG00000233086	-1.43828	0.00767069
ENSG00000226237	-2.54475	5.79086e-16
ENSG00000269994	-1.25911	0.000133982
ENSG00000233884	-2.29862	0.00629167
ENSG00000214888	-5.99799	4.91377e-47
ENSG00000234460	-3.29399	1.13737e-15
ENSG00000224945	2.30658	6.07767e-20
ENSG00000237626	-1.92655	0.00376395
ENSG00000228216	-1.46311	0.0104122
ENSG00000229694	-3.38799	3.01153e-26
ENSG00000235641	-1.06123	0.00013948
ENSG00000227603	-1.06317	1.56812e-08
ENSG00000269929	-1.35175	1.36471e-06
ENSG00000237857	1.54683	1.15899e-27
ENSG00000271314	1.97918	1.4192e-05
ENSG00000271659	1.49311	1.63278e-11
ENSG00000268926	-1.12314	5.34824e-06
ENSG00000225194	-2.91021	1.95666e-45
ENSG00000270412	-1.01806	5.47779e-05
ENSG00000226334	-1.09714	0.000132532
ENSG00000234323	-3.14421	1.36947e-17
ENSG00000234229	-1.99537	0.00856691
ENSG00000228623	-1.3521	2.74247e-08
ENSG00000233817	2.14294	0.000155036
ENSG00000239593	-1.14333	0.015483
ENSG00000269970	-2.25201	4.20737e-14
ENSG00000236901	-1.02936	3.17281e-10
ENSG00000224020	1.26105	3.10392e-06
ENSG00000257524	-1.58992	1.08789e-09
ENSG00000227218	-1.10428	1.56471e-07
ENSG00000232850	2.59838	5.28726e-38
ENSG00000225951	1.21433	0.00282625
ENSG00000267834	1.07295	0.000290112
ENSG00000268707	1.03657	0.0041642
ENSG00000224307	-1.56409	9.58026e-12
ENSG00000227619	2.51394	1.50617e-25
ENSG00000196979	-1.24453	0.00602904
ENSG00000228877	-1.67317	0.000653408
ENSG00000226706	1.31485	4.96038e-11
ENSG00000262075	-1.17024	0.00539704
ENSG00000196366	1.59686	9.05866e-21
ENSG00000227512	1.56926	6.11418e-08
ENSG00000237886	-1.05616	9.52211e-05
ENSG00000228401	-1.73638	4.19518e-14
ENSG00000233016	1.12322	8.17953e-14
ENSG00000273066	1.27114	2.88581e-12
ENSG00000236394	1.91526	0.000738757
ENSG00000260996	-1.18945	4.23433e-12
ENSG00000237419	-1.98999	4.82718e-08
ENSG00000225140	-1.35523	0.000485325
ENSG00000226762	-1.89864	0.000207608
ENSG00000233117	-2.32179	2.36978e-20
ENSG00000231298	-2.43651	3.71601e-22
ENSG00000225269	-1.36514	0.000958559
ENSG00000224034	1.34103	0.000616563
ENSG00000242147	2.30138	3.75793e-09
ENSG00000228951	-1.77213	0.0124146
ENSG00000225383	-2.69236	6.527e-26
ENSG00000229124	-1.48944	8.86011e-16
ENSG00000233968	-1.98876	3.23793e-14
ENSG00000238246	-2.11884	2.54718e-12
ENSG00000261671	-2.16037	1.61751e-10
ENSG00000280809	-1.82216	0.0162932
ENSG00000233261	-1.18148	0.00792813
ENSG00000262412	1.14748	0.00414406
ENSG00000237797	-1.10364	0.000219398
ENSG00000229656	1.16963	2.73221e-07
ENSG00000259869	-1.44306	2.67774e-05
ENSG00000273008	1.01874	1.48847e-07
ENSG00000226808	-1.46505	1.47438e-06
ENSG00000229116	-2.06847	1.28502e-07
ENSG00000224812	-1.67776	4.89569e-11
ENSG00000234504	-1.83501	0.00131854
ENSG00000223462	-3.7774	8.65573e-35
ENSG00000276850	-1.14128	0.00227664
ENSG00000264717	-1.69019	1.72473e-10
ENSG00000233665	-1.1653	0.000318189
ENSG00000235939	2.4512	2.47043e-05
ENSG00000226200	-1.02336	1.1247e-13
ENSG00000237949	-2.40845	0.000429073
ENSG00000235140	-4.01642	2.7576e-20
ENSG00000232682	-1.41477	1.50443e-06
ENSG00000228566	3.55169	3.0877e-12
ENSG00000226426	-1.7869	0.00670409
ENSG00000229261	-2.19156	1.35649e-19
ENSG00000231748	2.13278	5.2493e-10
ENSG00000272599	1.09858	4.30662e-13
ENSG00000233144	1.39349	0.00020046
ENSG00000273248	1.50151	0.00174214
ENSG00000236467	-1.71107	4.95826e-06
ENSG00000204049	2.32237	0.000252725
ENSG00000227136	-4.18851	2.682e-31
ENSG00000273372	-1.8389	0.000116764
ENSG00000229404	5.80177	1.16363e-30
ENSG00000271880	-1.6234	2.08006e-06
ENSG00000151303	-1.65467	9.15745e-07
ENSG00000224914	-1.04011	1.36521e-27
ENSG00000261438	-1.70603	1.00501e-22
ENSG00000232229	-1.71826	2.26052e-18
ENSG00000232913	-1.50986	0.00153056
ENSG00000257582	-2.39367	1.5753e-24
ENSG00000228778	-2.01948	3.28544e-13
ENSG00000234699	-1.29213	7.9662e-06
ENSG00000226431	-1.82028	1.51414e-05
ENSG00000280693	2.53676	1.12006e-23
ENSG00000260461	-1.11447	2.90649e-26
ENSG00000228261	1.47096	0.000527519
ENSG00000203497	-1.33498	1.37961e-27
ENSG00000278601	-1.39655	2.12417e-09
ENSG00000270589	-1.5584	1.89413e-13
ENSG00000234393	-1.47575	1.51176e-11
ENSG00000225936	-2.55488	1.9964e-11
ENSG00000229847	-1.56669	3.4269e-05
ENSG00000232139	1.41037	0.00337946
ENSG00000177234	1.41706	9.15027e-05
ENSG00000278484	-3.14511	3.17248e-18
ENSG00000237489	-1.07565	3.78336e-17
ENSG00000277218	1.02908	3.72848e-05
ENSG00000231705	-1.1909	0.00418545
ENSG00000180066	1.01955	9.9778e-07
ENSG00000226699	1.17165	0.000327267
ENSG00000255026	3.11271	3.82137e-24
ENSG00000270030	2.35165	3.15916e-11
ENSG00000255328	1.49293	8.35283e-07
ENSG00000270972	1.81111	2.4131e-07
ENSG00000254739	1.52103	0.000314218
ENSG00000254815	1.5147	6.55904e-11
ENSG00000255108	1.44029	1.63283e-07
ENSG00000198788	-1.36753	1.49271e-05
ENSG00000229671	-1.04399	0.000366495
ENSG00000226416	1.78756	0.00158022
ENSG00000130600	2.04771	1.49257e-10
ENSG00000099869	1.3304	0.00484657
ENSG00000269821	1.5616	2.68949e-15
ENSG00000247473	1.91874	1.5876e-05
ENSG00000224513	-2.71189	5.08161e-11
ENSG00000229368	-1.07471	2.45675e-06
ENSG00000254397	1.12928	0.00257043
ENSG00000254401	-1.51069	3.8864e-06
ENSG00000254847	-1.48325	2.53322e-07
ENSG00000251381	2.39329	5.56585e-08
ENSG00000254670	1.62109	4.80103e-08
ENSG00000254418	-1.46938	0.000326814
ENSG00000254695	-3.79022	4.13493e-18
ENSG00000254645	-6.0123	1.81589e-59
ENSG00000270607	-2.05792	1.55375e-09
ENSG00000254560	4.43075	7.29654e-53
ENSG00000254862	-1.32905	2.57752e-11
ENSG00000183242	2.03323	0.000837634
ENSG00000280798	-1.44216	4.99783e-37
ENSG00000255443	1.73474	3.31956e-11
ENSG00000251194	1.48645	1.40479e-09
ENSG00000255186	-2.30338	4.66923e-14
ENSG00000254427	-2.17093	1.38797e-08
ENSG00000205106	-1.87727	2.10784e-10
ENSG00000254602	-1.36681	3.84723e-06
ENSG00000214797	-3.28749	4.09604e-15
ENSG00000257052	-1.24761	2.08218e-06
ENSG00000256443	1.15804	4.2482e-07
ENSG00000250230	-1.48545	9.08917e-10
ENSG00000124915	1.82424	8.06951e-07
ENSG00000255446	-1.49865	0.0147605
ENSG00000257058	-1.51726	6.24679e-05
ENSG00000254964	1.15074	0.0187641
ENSG00000256690	1.57248	2.29707e-17
ENSG00000255717	1.49267	1.76207e-38
ENSG00000256940	1.79547	5.57985e-24
ENSG00000231680	-1.96645	1.56379e-08
ENSG00000255478	-2.25727	9.06221e-13
ENSG00000173727	-1.25177	1.1852e-14
ENSG00000251562	1.16999	6.81609e-07
ENSG00000254510	-3.06201	8.14356e-25
ENSG00000255236	-1.34569	0.000425353
ENSG00000250508	-1.01322	4.93834e-07
ENSG00000261625	-2.04567	2.56567e-14
ENSG00000261276	-1.81871	0.00034889
ENSG00000256508	-2.16547	2.28859e-10
ENSG00000260877	3.4438	6.85248e-26
ENSG00000255774	-1.31203	1.57323e-12
ENSG00000254605	1.00868	0.000136564
ENSG00000254682	1.0586	1.28331e-12
ENSG00000204971	-1.46112	0.0139521
ENSG00000255843	1.4462	9.87267e-05
ENSG00000227467	-3.13174	7.04895e-25
ENSG00000260401	-1.5921	4.34257e-20
ENSG00000254429	-1.48247	3.253e-06
ENSG00000254814	2.12074	0.000699434
ENSG00000255507	1.3506	4.32642e-06
ENSG00000254933	1.51891	0.00268163
ENSG00000255362	-1.32376	3.13386e-08
ENSG00000271757	1.20011	0.000955304
ENSG00000254632	-1.3039	0.00142016
ENSG00000254988	-2.55975	1.00862e-20
ENSG00000254675	1.77525	7.828e-07
ENSG00000254420	1.6289	0.00110719
ENSG00000246523	-1.05503	2.05429e-08
ENSG00000254911	1.55427	7.59905e-08
ENSG00000256916	3.86096	1.06721e-08
ENSG00000271390	-1.5485	0.00243119
ENSG00000271584	-1.49919	2.18426e-06
ENSG00000196167	-1.29874	8.06388e-07
ENSG00000247416	-2.17304	2.88963e-10
ENSG00000227487	-1.97487	2.08179e-05
ENSG00000246100	-1.02213	3.91116e-09
ENSG00000270403	-3.88743	4.02316e-38
ENSG00000254528	-1.20237	1.50622e-07
ENSG00000278376	-1.26922	8.24361e-19
ENSG00000245869	-2.24449	7.65306e-06
ENSG00000254740	-1.97061	0.00227362
ENSG00000255248	-1.62072	6.02885e-12
ENSG00000255090	-1.77784	9.36087e-07
ENSG00000250073	-2.43582	2.49813e-36
ENSG00000255465	2.27543	0.0014754
ENSG00000254703	-1.48759	2.18756e-17
ENSG00000254842	-1.43484	0.00168608
ENSG00000255455	-1.19585	9.04848e-24
ENSG00000204241	-1.86987	1.34469e-10
ENSG00000256694	2.55783	7.17199e-27
ENSG00000256540	2.37393	2.54362e-19
ENSG00000256706	-1.61922	0.00194581
ENSG00000235049	-3.05579	5.81504e-28
ENSG00000258092	2.09474	2.36732e-09
ENSG00000236908	1.53354	3.24541e-06
ENSG00000271969	1.33426	5.84474e-07
ENSG00000256967	1.08201	3.72191e-09
ENSG00000275367	-1.71055	3.89878e-11
ENSG00000245105	-1.61389	2.42932e-20
ENSG00000237248	-1.02757	2.45849e-13
ENSG00000231560	-1.29706	0.00169392
ENSG00000245648	1.06992	3.04296e-06
ENSG00000256039	-1.72243	6.71677e-07
ENSG00000275963	-1.0014	0.000280099
ENSG00000180861	-1.82371	8.21848e-14
ENSG00000256084	1.72838	0.000968052
ENSG00000256650	-1.9509	0.0127255
ENSG00000256879	-1.76195	0.000408234
ENSG00000274624	-1.55737	0.00015191
ENSG00000256973	-1.31723	2.12556e-07
ENSG00000257023	-1.66038	1.20977e-05
ENSG00000255864	-1.15391	0.00327
ENSG00000276842	-2.02045	3.22448e-09
ENSG00000256894	-1.04594	3.39167e-07
ENSG00000245311	2.35682	0.0176085
ENSG00000256377	-2.84595	5.03189e-21
ENSG00000276261	-1.26916	2.62318e-09
ENSG00000273989	1.12121	0.0220885
ENSG00000235884	2.96506	3.24282e-16
ENSG00000245614	1.02236	1.85262e-10
ENSG00000256232	-1.07118	0.000202162
ENSG00000276900	-1.17853	3.16313e-14
ENSG00000255760	-1.97382	0.000550636
ENSG00000277342	1.6804	1.65724e-07
ENSG00000274964	1.10143	2.55175e-08
ENSG00000276115	1.00979	1.31263e-06
ENSG00000257718	-1.52675	4.66612e-15
ENSG00000225342	-1.7518	1.6606e-13
ENSG00000274943	1.02791	3.01598e-06
ENSG00000257925	2.03328	7.26554e-06
ENSG00000257924	1.05481	0.00651902
ENSG00000257906	1.88908	0.00634747
ENSG00000277173	1.43597	3.06761e-06
ENSG00000276691	1.29739	8.38869e-05
ENSG00000274737	1.08753	0.0103683
ENSG00000257955	-1.68596	0.000120128
ENSG00000257913	2.62943	8.74554e-34
ENSG00000258017	1.82275	4.14793e-10
ENSG00000257588	4.96817	2.41535e-15
ENSG00000257671	2.99596	2.10327e-14
ENSG00000257829	1.52329	0.0005006
ENSG00000257605	1.44005	5.85816e-22
ENSG00000228630	1.85588	0.00480742
ENSG00000250133	1.79184	0.0016294
ENSG00000260597	1.45693	0.0107282
ENSG00000250742	-1.61958	2.96372e-23
ENSG00000248576	-2.12876	3.19125e-08
ENSG00000257596	1.18104	4.83136e-10
ENSG00000258137	-2.691	2.56859e-09
ENSG00000276272	1.72676	0.000134744
ENSG00000259125	1.24829	0.000104997
ENSG00000276727	2.26839	4.08449e-07
ENSG00000224713	-1.38299	1.58848e-07
ENSG00000255737	1.0612	1.98205e-13
ENSG00000257698	-1.39563	2.45674e-15
ENSG00000277895	1.51937	4.3347e-06
ENSG00000250748	-1.07788	0.0105399
ENSG00000197301	1.92831	1.45349e-13
ENSG00000203585	-2.52464	6.73379e-15
ENSG00000235872	-1.5229	2.11038e-10
ENSG00000255970	-1.36874	2.67871e-06
ENSG00000255733	-1.99601	4.8976e-12
ENSG00000251301	-1.13974	3.97379e-06
ENSG00000273824	-1.19063	0.000140722
ENSG00000274979	2.53471	1.06628e-17
ENSG00000258168	-1.4357	2.68253e-15
ENSG00000277247	1.36431	2.48117e-05
ENSG00000258053	-1.18173	3.86173e-06
ENSG00000277223	2.53566	1.12307e-10
ENSG00000257761	2.67877	1.03096e-20
ENSG00000236333	-2.84818	8.61133e-13
ENSG00000257497	1.02304	8.54641e-10
ENSG00000258077	4.44884	1.78883e-28
ENSG00000258088	2.7678	4.16669e-07
ENSG00000257329	1.89557	0.0162101
ENSG00000257453	3.65161	4.35356e-13
ENSG00000257219	2.565	5.23789e-07
ENSG00000257526	1.79732	6.64745e-09
ENSG00000257191	2.96765	8.86913e-09
ENSG00000257557	-1.08634	1.86211e-15
ENSG00000281333	-1.54277	1.11181e-10
ENSG00000278011	-1.53735	0.00328185
ENSG00000258216	-3.26072	2.77784e-13
ENSG00000257194	-3.66671	1.38569e-23
ENSG00000258100	-1.17736	0.00822267
ENSG00000245904	-1.20254	9.73801e-09
ENSG00000277851	-1.63588	1.65042e-06
ENSG00000205056	-2.42154	1.50604e-14
ENSG00000246985	-1.14683	2.34419e-14
ENSG00000258274	-3.5357	1.32585e-15
ENSG00000258247	-2.87305	0.000355693
ENSG00000257766	-2.25357	1.05019e-13
ENSG00000257859	-2.65591	1.65976e-16
ENSG00000260329	-1.32952	1.21057e-09
ENSG00000256262	-1.52668	7.93944e-13
ENSG00000256139	-1.69343	3.96486e-25
ENSG00000255650	3.31205	3.81512e-36
ENSG00000257452	1.30127	0.0137011
ENSG00000249550	6.03956	1.75878e-44
ENSG00000257883	2.03211	4.7363e-10
ENSG00000257654	1.83845	0.0132267
ENSG00000274554	1.07657	0.0012223
ENSG00000277840	1.88022	3.93738e-11
ENSG00000275759	-1.2986	1.22673e-08
ENSG00000275409	-1.19254	1.30356e-06
ENSG00000256008	2.70382	1.03005e-08
ENSG00000274029	-1.2778	0.000379046
ENSG00000256092	1.17369	1.68621e-16
ENSG00000274427	1.66311	3.37286e-06
ENSG00000270061	1.04889	0.000572431
ENSG00000249267	1.46031	0.00432533
ENSG00000275212	-2.57703	1.72145e-07
ENSG00000256193	-4.33878	2.16778e-42
ENSG00000256643	-2.93491	2.73783e-30
ENSG00000261650	6.60543	1.22854e-52
ENSG00000214039	8.85856	2.32617e-162
ENSG00000256298	4.48624	2.00305e-05
ENSG00000276122	5.50651	1.41927e-06
ENSG00000259862	3.50939	0.00554618
ENSG00000273568	1.31788	2.58875e-17
ENSG00000256943	1.29914	0.000277842
ENSG00000277011	1.98872	9.55769e-07
ENSG00000274373	1.10348	9.97889e-07
ENSG00000277186	1.19257	0.0031048
ENSG00000236617	-1.18486	6.27845e-05
ENSG00000250790	-1.24223	5.03503e-07
ENSG00000278291	1.04927	1.32308e-08
ENSG00000275485	1.48754	1.91216e-07
ENSG00000236953	1.63314	2.52358e-06
ENSG00000262619	-2.41533	4.24981e-07
ENSG00000262198	-3.25426	1.32062e-12
ENSG00000232977	-1.22822	9.16486e-05
ENSG00000234772	1.29431	0.00192844
ENSG00000247381	5.23907	9.60942e-58
ENSG00000236094	2.1115	0.00516964
ENSG00000230490	-1.4781	4.37097e-13
ENSG00000234535	-1.72052	6.75117e-10
ENSG00000276672	1.2431	2.25825e-12
ENSG00000236711	-1.1573	0.00201001
ENSG00000271216	3.71394	3.0435e-07
ENSG00000274001	1.24896	0.00129145
ENSG00000226519	-2.0072	8.30479e-09
ENSG00000227258	-2.20001	1.91859e-21
ENSG00000235285	-1.95887	7.90573e-05
ENSG00000230731	-2.275	6.58503e-13
ENSG00000277831	1.38619	0.000548723
ENSG00000237361	1.27084	4.34036e-07
ENSG00000228886	1.31111	0.000633488
ENSG00000235366	-2.90021	1.2549e-27
ENSG00000229111	1.12678	9.76391e-05
ENSG00000233610	-1.32634	0.00296977
ENSG00000274270	1.67955	1.64269e-16
ENSG00000237152	2.2086	1.08758e-16
ENSG00000278238	1.03003	5.19461e-08
ENSG00000273723	1.31459	1.75522e-15
ENSG00000235532	-2.55226	2.71567e-16
ENSG00000261553	1.1629	4.21018e-16
ENSG00000261105	2.05755	1.43503e-11
ENSG00000228444	1.21506	1.19684e-07
ENSG00000278727	-1.36057	2.92866e-10
ENSG00000281721	-3.26482	5.9732e-23
ENSG00000215417	2.02565	5.2583e-22
ENSG00000278177	-1.1197	0.000229838
ENSG00000223392	3.73417	1.17799e-11
ENSG00000276573	1.99041	1.99171e-06
ENSG00000231194	1.31665	0.0076234
ENSG00000228889	1.01227	1.64406e-13
ENSG00000280734	1.2516	1.40584e-16
ENSG00000280710	1.11441	2.28484e-08
ENSG00000272143	-2.54809	3.2925e-32
ENSG00000276957	1.12778	1.29496e-05
ENSG00000233532	6.4447	3.92816e-43
ENSG00000275216	4.20539	5.79389e-26
ENSG00000275830	-2.0449	6.64531e-06
ENSG00000255874	1.64823	1.40813e-16
ENSG00000225760	1.66087	9.37456e-07
ENSG00000224243	-1.91533	0.00365646
ENSG00000277159	-1.09338	6.08557e-07
ENSG00000235280	1.50016	4.39711e-16
ENSG00000269125	1.31229	0.000346662
ENSG00000278309	-2.68581	1.98806e-16
ENSG00000233695	2.77435	1.07876e-28
ENSG00000259001	2.6951	0.00961939
ENSG00000258810	-1.41794	1.77097e-10
ENSG00000258918	-1.44695	0.00356854
ENSG00000258604	-2.03314	2.5888e-12
ENSG00000258441	-1.24649	8.52415e-15
ENSG00000259054	1.86924	1.44e-05
ENSG00000237054	1.62692	1.25461e-13
ENSG00000257842	-3.0785	7.11758e-20
ENSG00000257185	-2.34244	2.78264e-08
ENSG00000258525	1.09917	0.016567
ENSG00000257831	1.18488	3.39697e-05
ENSG00000257472	2.09897	0.00665278
ENSG00000258897	-1.34588	0.00185926
ENSG00000259002	-2.64417	3.22375e-13
ENSG00000259135	-3.05566	1.71915e-12
ENSG00000258708	-1.03028	2.62745e-06
ENSG00000259087	-4.62493	3.44963e-58
ENSG00000259070	-1.29701	4.84563e-08
ENSG00000251363	-1.70318	0.0118628
ENSG00000259129	-2.53908	1.21151e-05
ENSG00000214900	-1.4529	4.72549e-25
ENSG00000258857	-1.21908	2.48253e-06
ENSG00000258479	-2.06676	4.08376e-08
ENSG00000258537	-3.63685	2.16367e-17
ENSG00000225680	3.74481	2.87835e-29
ENSG00000277763	-2.19864	1.19243e-19
ENSG00000275569	-1.29083	1.76424e-05
ENSG00000259969	-1.16004	3.94622e-07
ENSG00000254718	-1.01479	3.28811e-06
ENSG00000258926	-1.02542	0.00393443
ENSG00000250548	2.26197	3.44019e-08
ENSG00000186369	-1.46115	0.000287049
ENSG00000274015	1.26163	8.9856e-10
ENSG00000214770	1.01708	2.99547e-06
ENSG00000258561	1.57554	4.46003e-20
ENSG00000258837	-2.14037	6.01788e-09
ENSG00000259038	1.38866	2.35938e-06
ENSG00000258689	2.0584	9.08959e-06
ENSG00000275630	1.17468	0.00765348
ENSG00000269927	1.55859	0.00219198
ENSG00000258603	-1.07774	0.00160529
ENSG00000270000	1.13616	0.00205398
ENSG00000259319	-1.97755	1.99673e-42
ENSG00000224721	-5.26755	2.32629e-60
ENSG00000246548	-1.11183	0.00332897
ENSG00000258819	-2.03699	4.8416e-13
ENSG00000258999	-1.02537	0.000653713
ENSG00000258675	-1.60798	2.14486e-05
ENSG00000205562	-1.49276	2.42244e-05
ENSG00000258733	-1.05067	6.88958e-07
ENSG00000258867	1.48214	9.28921e-06
ENSG00000258789	-1.6372	2.21153e-14
ENSG00000258792	-1.50471	0.000118647
ENSG00000258884	1.3542	2.26335e-05
ENSG00000258875	-1.04125	1.45504e-07
ENSG00000258798	1.56046	4.73397e-07
ENSG00000258499	-2.01233	0.00233184
ENSG00000278396	-1.25725	3.85035e-13
ENSG00000258987	-3.62279	1.21791e-30
ENSG00000258630	-2.3876	8.88884e-21
ENSG00000258572	-2.09883	2.84244e-12
ENSG00000187621	-2.24426	6.49237e-10
ENSG00000257275	-5.1359	5.96955e-13
ENSG00000250366	-1.34874	0.00115436
ENSG00000227051	-2.29691	1.21919e-30
ENSG00000258793	-2.59334	8.19072e-19
ENSG00000225163	2.28816	8.05126e-12
ENSG00000246223	-2.17335	1.22742e-15
ENSG00000247970	-1.61691	1.09146e-09
ENSG00000259023	2.32348	0.000809458
ENSG00000258919	3.01072	4.16857e-30
ENSG00000258404	2.64699	3.35816e-17
ENSG00000258851	-1.1934	0.00355234
ENSG00000258913	-1.86541	5.9649e-09
ENSG00000256050	1.06278	3.7965e-05
ENSG00000254140	-1.66164	5.09479e-05
ENSG00000253364	-1.83493	1.47863e-06
ENSG00000253701	-4.17175	1.5737e-44
ENSG00000244620	-2.62932	5.02401e-11
ENSG00000226777	-2.70392	2.83784e-21
ENSG00000260409	-1.75857	0.00083904
ENSG00000274253	-2.34225	2.08784e-10
ENSG00000259905	-2.41468	1.91536e-10
ENSG00000224078	-1.58129	1.14209e-12
ENSG00000271347	-1.10043	0.00665846
ENSG00000257647	-1.96601	5.19794e-08
ENSG00000257151	-2.27218	2.761e-16
ENSG00000261069	-1.73688	5.9586e-07
ENSG00000274307	-1.20368	5.07454e-09
ENSG00000256802	-1.69399	4.23528e-12
ENSG00000259523	-1.30042	4.11883e-15
ENSG00000269974	1.07558	6.93496e-05
ENSG00000261064	-1.3357	1.42274e-10
ENSG00000259721	1.13974	6.79138e-05
ENSG00000259446	-2.99904	4.91181e-06
ENSG00000259225	3.38351	7.50275e-19
ENSG00000259450	1.02441	0.00854888
ENSG00000175746	1.88973	0.00185032
ENSG00000278621	-2.49093	7.62602e-17
ENSG00000248508	-1.16079	1.56704e-23
ENSG00000259330	-1.64325	2.65421e-20
ENSG00000174171	3.12934	2.23096e-20
ENSG00000259883	-1.01822	0.00051057
ENSG00000261687	1.29703	0.00243302
ENSG00000259932	-1.08746	8.28634e-05
ENSG00000259520	-1.0748	2.84291e-05
ENSG00000259342	-2.34152	2.74562e-29
ENSG00000259354	-1.1458	4.88754e-13
ENSG00000273972	-2.71586	5.22329e-24
ENSG00000259240	2.12179	3.53956e-20
ENSG00000259306	2.25407	9.72207e-11
ENSG00000260618	-1.37112	1.86896e-10
ENSG00000259237	-4.9063	3.27544e-35
ENSG00000276533	1.01413	0.000133117
ENSG00000276524	1.01963	0.00175843
ENSG00000259353	-1.29519	0.000324734
ENSG00000277144	-1.17821	1.81597e-05
ENSG00000227161	-1.42196	0.000785729
ENSG00000259370	-2.36963	3.85203e-22
ENSG00000259672	-3.0116	1.09893e-09
ENSG00000259459	-3.66034	8.35037e-40
ENSG00000277351	-1.51929	6.08702e-08
ENSG00000259471	3.0101	0.00580331
ENSG00000259347	-2.30522	4.59879e-11
ENSG00000270964	-1.49034	1.82877e-28
ENSG00000212766	1.39192	3.32804e-05
ENSG00000261634	-1.50581	9.88998e-06
ENSG00000245750	-2.2394	2.64008e-17
ENSG00000259457	-1.48807	0.00598453
ENSG00000260037	-1.28129	5.6429e-06
ENSG00000260173	-2.88182	4.26884e-27
ENSG00000260339	-1.59469	1.11682e-19
ENSG00000259264	3.82141	2.97396e-16
ENSG00000260274	-1.05408	5.51666e-13
ENSG00000276744	1.28477	2.57023e-10
ENSG00000259514	-1.94189	8.01879e-07
ENSG00000259417	-3.53682	1.26568e-50
ENSG00000259495	-2.47825	1.33192e-17
ENSG00000259649	1.75174	7.97804e-06
ENSG00000259462	-1.71679	0.00436192
ENSG00000252690	1.05132	1.61146e-08
ENSG00000274128	-2.29313	2.02435e-09
ENSG00000275120	-1.37763	2.45262e-09
ENSG00000254414	-1.50655	4.56321e-06
ENSG00000259416	1.36827	0.00133873
ENSG00000255571	-1.84886	7.5767e-21
ENSG00000259291	-1.23413	2.19156e-13
ENSG00000258384	1.01829	5.05136e-07
ENSG00000278514	1.15069	0.0119402
ENSG00000258551	2.83465	0.000191391
ENSG00000258647	-2.40335	2.22897e-17
ENSG00000258676	-1.66732	1.10259e-09
ENSG00000260337	-1.60283	2.9085e-12
ENSG00000257060	-2.24569	5.77882e-06
ENSG00000258754	-1.45552	4.06702e-06
ENSG00000248441	-1.7905	3.57892e-20
ENSG00000259134	-1.53277	1.2577e-07
ENSG00000273771	-2.31439	2.62787e-14
ENSG00000247809	-1.51591	2.13305e-13
ENSG00000277135	-1.87683	2.346e-06
ENSG00000259275	-1.37628	9.56317e-17
ENSG00000259542	-1.32991	0.00202661
ENSG00000259485	5.45064	3.09978e-34
ENSG00000259664	2.24084	4.86662e-05
ENSG00000251209	-1.6917	5.91617e-08
ENSG00000259478	-2.52902	0.0122131
ENSG00000258483	-1.08208	0.000760502
ENSG00000274312	-1.83014	0.000533983
ENSG00000259424	1.03179	0.00119039
ENSG00000261054	-2.17426	3.39642e-08
ENSG00000261616	-2.98178	3.13163e-25
ENSG00000259590	2.04752	1.55897e-05
ENSG00000259760	1.75046	0.000804878
ENSG00000259341	-1.05366	0.00121719
ENSG00000259363	-1.90502	2.1006e-14
ENSG00000189419	-1.01378	2.14351e-09
ENSG00000274139	-1.47334	8.23331e-05
ENSG00000277210	-2.14092	4.11875e-16
ENSG00000259658	-1.68068	5.50781e-10
ENSG00000231439	2.24974	6.39882e-10
ENSG00000228779	1.32136	0.000114109
ENSG00000262528	1.05843	0.00581945
ENSG00000260394	1.9505	0.00021289
ENSG00000275438	-1.40389	0.00715139
ENSG00000260316	1.0015	0.000386186
ENSG00000260496	1.06646	0.013603
ENSG00000273551	1.22321	0.0074328
ENSG00000261294	-1.32414	0.000424128
ENSG00000277010	-1.31366	2.08581e-10
ENSG00000260182	-1.54668	0.000226849
ENSG00000260710	3.3597	4.01974e-11
ENSG00000260051	1.55649	8.44249e-10
ENSG00000275092	2.1076	1.06505e-15
ENSG00000260541	-1.616	1.01362e-08
ENSG00000277602	2.11193	0.00169396
ENSG00000259933	1.07699	1.09046e-14
ENSG00000259780	1.64278	0.00145172
ENSG00000260095	1.05731	1.95173e-06
ENSG00000259895	1.1356	0.0134559
ENSG00000260176	-1.25169	0.0008197
ENSG00000263325	2.73018	1.42695e-17
ENSG00000272079	-1.08875	4.25872e-11
ENSG00000261971	1.15405	5.48496e-11
ENSG00000262370	1.59114	1.20377e-09
ENSG00000263011	1.05272	0.000150149
ENSG00000263235	1.19058	1.75013e-11
ENSG00000262888	-1.21168	0.000241143
ENSG00000262185	-1.24343	5.39523e-09
ENSG00000262468	1.06851	3.98896e-16
ENSG00000262712	1.22223	1.35865e-15
ENSG00000279877	-1.7173	1.67877e-05
ENSG00000274038	1.18407	0.00143581
ENSG00000263080	1.09078	2.74882e-06
ENSG00000262703	1.75869	2.83316e-11
ENSG00000261560	1.44669	1.62702e-09
ENSG00000262097	-2.6803	9.74841e-24
ENSG00000262380	1.75807	0.00266172
ENSG00000263065	-3.08716	2.22997e-13
ENSG00000260352	-1.16688	2.16044e-17
ENSG00000260430	1.26295	1.62117e-05
ENSG00000259871	-1.34623	0.0040609
ENSG00000259925	-1.60143	4.18634e-12
ENSG00000263331	2.55945	3.0438e-05
ENSG00000236481	2.39682	5.53829e-09
ENSG00000274092	-1.20276	8.96745e-11
ENSG00000261329	1.24188	0.00135632
ENSG00000246465	1.83317	5.51053e-14
ENSG00000275441	1.01021	3.27289e-07
ENSG00000275807	1.04356	1.16455e-11
ENSG00000260442	1.41931	4.74393e-13
ENSG00000259807	2.44056	1.26564e-15
ENSG00000260719	-2.85754	6.83663e-19
ENSG00000214725	2.13288	1.92562e-09
ENSG00000260167	1.04761	1.32048e-06
ENSG00000260899	1.30974	9.30779e-11
ENSG00000274678	1.24953	2.42271e-05
ENSG00000261124	1.03689	0.0132671
ENSG00000260304	1.40697	0.00689715
ENSG00000260757	2.05533	9.66328e-05
ENSG00000276867	1.32464	0.000526824
ENSG00000205414	1.47043	1.64686e-05
ENSG00000270120	1.01839	0.00425334
ENSG00000261644	-1.14826	3.19348e-06
ENSG00000260057	-3.52802	3.93702e-15
ENSG00000249231	-1.86231	5.7224e-14
ENSG00000261550	-2.52295	7.35508e-21
ENSG00000277639	-1.02496	2.29663e-05
ENSG00000261804	1.34501	7.356e-10
ENSG00000275191	1.81174	5.21885e-07
ENSG00000277559	1.91533	0.000443145
ENSG00000245694	3.8866	1.35224e-49
ENSG00000260135	1.2015	0.000123014
ENSG00000246379	-2.4784	1.08215e-16
ENSG00000272372	-3.04764	4.38237e-14
ENSG00000259923	-2.39768	0.000189427
ENSG00000260145	2.06006	1.10235e-07
ENSG00000276166	1.2348	0.000277754
ENSG00000259847	1.3226	0.0134371
ENSG00000260834	13.7369	2.47784e-06
ENSG00000261742	2.561	5.78683e-12
ENSG00000246898	1.44455	3.00687e-12
ENSG00000246777	-1.55875	2.40617e-10
ENSG00000265408	-2.0189	1.93945e-05
ENSG00000276075	-1.20223	9.79946e-07
ENSG00000261469	-2.66809	1.69876e-44
ENSG00000260577	2.35608	1.14082e-20
ENSG00000260798	1.91951	0.000423894
ENSG00000262136	1.94451	3.21769e-09
ENSG00000214353	2.70025	1.53419e-23
ENSG00000260015	2.48578	0.00203901
ENSG00000260886	-1.39837	0.000512868
ENSG00000261513	-2.11259	1.08457e-12
ENSG00000261008	1.27471	8.72639e-17
ENSG00000275236	1.06495	0.000477596
ENSG00000274220	-1.24046	1.26558e-11
ENSG00000273971	-2.50828	7.83398e-12
ENSG00000277954	-1.72619	2.84851e-13
ENSG00000261472	-2.18361	0.000811247
ENSG00000278058	-1.93232	2.0938e-11
ENSG00000260876	-1.26816	0.000490914
ENSG00000261390	-1.34624	4.96391e-13
ENSG00000261141	1.00697	3.40243e-05
ENSG00000261838	1.66178	0.00558019
ENSG00000261218	-1.8175	8.20299e-09
ENSG00000261243	1.29535	0.00720135
ENSG00000278214	-1.29756	1.4865e-06
ENSG00000275088	-2.19674	1.60003e-16
ENSG00000278716	1.45011	0.000823454
ENSG00000275393	-1.56359	5.25115e-05
ENSG00000268804	-2.10013	2.81909e-07
ENSG00000269667	-4.0076	2.44562e-46
ENSG00000268078	-1.0434	0.00407916
ENSG00000268505	-2.61892	1.17577e-33
ENSG00000269186	-2.91094	8.25341e-34
ENSG00000268754	-1.90042	7.31502e-14
ENSG00000268532	-1.02613	0.00366315
ENSG00000268388	-1.90415	1.19263e-22
ENSG00000261175	2.58461	1.25069e-07
ENSG00000276337	1.97986	1.43681e-17
ENSG00000226180	1.00859	1.71499e-07
ENSG00000260671	1.07872	0.00205116
ENSG00000260498	1.57238	0.000346381
ENSG00000261193	-1.86678	2.36648e-05
ENSG00000260166	-2.29318	0.000586014
ENSG00000205037	-2.92352	1.3188e-17
ENSG00000261327	1.88076	4.1445e-11
ENSG00000261744	1.63917	8.35301e-07
ENSG00000261253	1.30187	0.000202689
ENSG00000261373	2.30974	3.66771e-39
ENSG00000267048	1.67488	7.87718e-07
ENSG00000221819	1.27824	0.000569475
ENSG00000262061	-1.86498	2.86795e-15
ENSG00000262294	-1.52837	4.70591e-26
ENSG00000262558	-1.02738	1.47135e-10
ENSG00000262905	1.69345	0.00185918
ENSG00000277491	-1.12315	0.000232776
ENSG00000186594	-1.7826	3.37672e-53
ENSG00000262050	-1.36237	1.25987e-19
ENSG00000277200	-1.63147	9.52497e-13
ENSG00000262884	1.14194	0.0159748
ENSG00000263312	-2.62658	5.29846e-19
ENSG00000229782	2.25277	2.28386e-06
ENSG00000261863	4.23636	6.53174e-22
ENSG00000267532	-2.49158	9.14333e-40
ENSG00000262251	1.19705	1.57322e-14
ENSG00000178977	-1.04021	2.09492e-11
ENSG00000266389	-1.60674	1.26715e-08
ENSG00000265975	-1.55529	1.35291e-09
ENSG00000273388	1.75039	0.00486924
ENSG00000264067	1.79539	0.0114572
ENSG00000263400	-2.65592	9.35166e-51
ENSG00000264016	-3.03389	5.87163e-38
ENSG00000266114	-2.58512	2.96799e-09
ENSG00000263429	-1.88203	1.34646e-39
ENSG00000263508	-2.51832	1.1298e-33
ENSG00000266368	-1.00542	0.00409171
ENSG00000265489	-4.69747	2.06829e-51
ENSG00000277621	-2.14327	2.73193e-08
ENSG00000265519	-2.39971	4.63444e-34
ENSG00000276855	-2.4639	2.42355e-31
ENSG00000230709	-3.35695	5.73357e-25
ENSG00000260328	3.80516	3.17782e-20
ENSG00000220161	-1.17648	0.00951634
ENSG00000273018	-1.00301	0.00135156
ENSG00000235979	-1.65677	0.00156721
ENSG00000262681	-1.10765	0.0130022
ENSG00000261033	-1.97191	2.14189e-06
ENSG00000267644	1.60801	0.000155435
ENSG00000264044	1.9456	1.04192e-06
ENSG00000265474	1.01444	0.000453873
ENSG00000276995	-1.13711	2.14251e-08
ENSG00000264647	2.12853	0.00690179
ENSG00000265443	1.35801	0.0197632
ENSG00000263603	1.80126	7.19615e-07
ENSG00000265791	1.07655	3.83424e-07
ENSG00000278546	2.26097	4.15077e-06
ENSG00000265356	-3.95292	4.60632e-23
ENSG00000261156	-2.48116	7.9559e-06
ENSG00000267364	-1.00942	5.74199e-08
ENSG00000267074	-1.10871	2.87783e-06
ENSG00000271392	-2.29042	4.49126e-11
ENSG00000275431	-2.0802	4.10741e-18
ENSG00000274767	-1.16251	2.21764e-05
ENSG00000275665	1.50686	5.29287e-05
ENSG00000266088	1.18378	2.01494e-06
ENSG00000234477	1.98754	6.95571e-07
ENSG00000226629	-5.5263	1.38311e-56
ENSG00000236194	1.28392	0.00101714
ENSG00000273650	-1.33284	0.000851585
ENSG00000213373	-1.35732	8.36666e-05
ENSG00000267747	2.8007	5.88448e-11
ENSG00000267420	-2.17897	2.05269e-05
ENSG00000261514	-2.19314	0.000639911
ENSG00000260793	-1.00711	3.73927e-12
ENSG00000267505	-3.39448	1.24537e-27
ENSG00000267405	-3.51278	3.62895e-25
ENSG00000267288	1.51199	1.76818e-11
ENSG00000261886	1.72285	0.00655887
ENSG00000263293	-1.43788	1.0055e-07
ENSG00000266601	-1.30918	1.42371e-15
ENSG00000250282	-1.12851	4.04281e-07
ENSG00000253102	-3.06107	2.23681e-33
ENSG00000275897	-3.0402	2.06878e-34
ENSG00000167117	-1.81358	3.25753e-38
ENSG00000262006	1.66149	0.00742831
ENSG00000251665	1.1368	0.00048853
ENSG00000267452	1.52126	0.00096258
ENSG00000263317	-1.61251	0.0122326
ENSG00000262298	1.00606	0.0115465
ENSG00000267302	-1.12153	8.12846e-08
ENSG00000267207	-2.32319	4.24889e-07
ENSG00000267667	-1.96758	5.31579e-06
ENSG00000187013	1.11645	2.23244e-06
ENSG00000266402	2.90133	2.59654e-20
ENSG00000280299	1.29077	0.00408787
ENSG00000263470	-1.8511	1.85947e-36
ENSG00000263520	2.51738	0.001582
ENSG00000266176	-3.98987	7.35792e-31
ENSG00000278740	-1.17814	0.000199508
ENSG00000267731	-1.38401	8.93342e-08
ENSG00000231749	2.82134	1.13131e-06
ENSG00000267653	-2.49695	4.10768e-11
ENSG00000267194	-1.62153	6.06296e-18
ENSG00000267365	-1.52057	2.62325e-17
ENSG00000226101	1.0182	0.0122474
ENSG00000263680	1.27274	1.32905e-05
ENSG00000264860	-1.69971	0.0120623
ENSG00000246731	-1.15313	6.00988e-10
ENSG00000182352	3.6844	9.13971e-17
ENSG00000261222	1.10877	0.000508467
ENSG00000266036	-1.99448	2.59906e-21
ENSG00000263586	-1.37525	4.46963e-08
ENSG00000267342	1.05711	1.31232e-07
ENSG00000163597	1.20245	2.40792e-31
ENSG00000263718	-1.71023	5.05222e-14
ENSG00000266998	-1.18981	0.000772013
ENSG00000267506	-2.61586	5.7874e-16
ENSG00000267466	-2.6747	2.02083e-24
ENSG00000267432	3.26556	1.71053e-14
ENSG00000267123	3.07232	9.29327e-22
ENSG00000267719	-1.8708	4.83586e-05
ENSG00000262768	3.36288	4.58672e-17
ENSG00000262772	3.721	6.59141e-32
ENSG00000262585	2.61481	5.72672e-38
ENSG00000262188	2.87362	8.01195e-25
ENSG00000262172	3.71997	1.77157e-23
ENSG00000262979	3.02356	1.22734e-17
ENSG00000262873	-1.07503	4.2714e-06
ENSG00000262115	-1.26249	1.19324e-07
ENSG00000260005	1.0775	3.32845e-07
ENSG00000185168	-1.06101	1.21924e-06
ENSG00000275966	2.13189	3.09096e-13
ENSG00000263154	2.70106	1.40197e-06
ENSG00000265688	2.79842	3.79125e-85
ENSG00000235296	3.19731	3.86727e-11
ENSG00000264569	1.52924	0.00044266
ENSG00000264548	1.59737	3.93187e-12
ENSG00000266445	1.1347	0.000618886
ENSG00000262147	1.16878	9.51928e-10
ENSG00000263063	-1.14658	6.34166e-06
ENSG00000263321	1.12067	0.000614086
ENSG00000262663	1.17802	6.40016e-05
ENSG00000274370	-2.56359	5.15102e-38
ENSG00000261888	-2.46115	1.76023e-42
ENSG00000266456	1.20901	0.0012008
ENSG00000265179	-1.1868	4.01836e-05
ENSG00000263745	3.86403	8.73478e-27
ENSG00000266835	1.30075	2.47156e-09
ENSG00000262001	1.62134	7.48238e-23
ENSG00000266401	3.0686	1.24977e-06
ENSG00000261520	1.84379	0.00776558
ENSG00000264575	-1.295	5.50146e-11
ENSG00000263753	-1.25442	5.18967e-14
ENSG00000265933	-1.09674	8.31534e-07
ENSG00000265413	-1.12045	0.000141851
ENSG00000265962	-1.25509	0.00485507
ENSG00000272799	-1.7475	6.66881e-07
ENSG00000265554	3.01338	4.18372e-10
ENSG00000266955	-2.22748	5.08383e-06
ENSG00000267480	-1.65966	1.72417e-27
ENSG00000267108	1.81781	0.000193687
ENSG00000260302	-1.18696	0.000764665
ENSG00000267690	-1.80363	4.81024e-05
ENSG00000264222	1.87965	1.50826e-06
ENSG00000266554	-1.71205	3.37392e-08
ENSG00000265656	-1.72267	4.68112e-07
ENSG00000265142	-3.18444	1.09534e-10
ENSG00000265752	-1.28477	3.58898e-06
ENSG00000265485	-1.632	3.61415e-16
ENSG00000266573	-2.30076	5.79871e-08
ENSG00000260372	-1.57665	0.000479531
ENSG00000265369	-3.48216	2.1811e-24
ENSG00000266729	1.91123	0.0003517
ENSG00000264859	-1.09566	1.35357e-10
ENSG00000263823	-1.21735	4.45405e-25
ENSG00000274275	-2.28682	1.25564e-08
ENSG00000267707	-1.40903	0.000131236
ENSG00000267414	-1.71357	2.98703e-18
ENSG00000267097	-1.52234	0.0102079
ENSG00000266968	-1.53986	0.000291689
ENSG00000267013	2.53139	1.31546e-17
ENSG00000278703	-1.35613	2.40855e-07
ENSG00000267787	-1.36583	5.27827e-12
ENSG00000267257	-2.94408	2.96557e-14
ENSG00000275418	-2.01187	2.81982e-07
ENSG00000267476	2.7019	0.00562759
ENSG00000267774	-4.10529	2.46739e-19
ENSG00000267279	1.2191	1.80721e-05
ENSG00000267390	-1.2056	4.1311e-15
ENSG00000260578	-1.4871	4.95119e-07
ENSG00000266278	1.3612	0.00470633
ENSG00000273669	-1.33958	8.51179e-10
ENSG00000263812	-2.60701	2.88483e-24
ENSG00000278107	-1.27699	1.53692e-13
ENSG00000266844	-1.38111	0.00294891
ENSG00000264015	-1.36325	0.0189002
ENSG00000267015	-1.89387	3.85052e-07
ENSG00000266933	1.38351	2.87757e-08
ENSG00000267666	1.31294	0.00272091
ENSG00000272473	1.51216	0.000102467
ENSG00000267530	2.66632	1.17336e-36
ENSG00000275162	1.59821	0.000904161
ENSG00000267092	1.67169	1.60386e-08
ENSG00000267073	4.70525	3.68309e-10
ENSG00000180846	1.05572	0.00133944
ENSG00000267283	1.13142	5.77846e-06
ENSG00000267201	1.01874	0.000528879
ENSG00000267551	2.56165	9.29744e-08
ENSG00000267304	-1.91005	3.00146e-06
ENSG00000267138	1.38146	0.000534104
ENSG00000267255	2.12316	0.000202813
ENSG00000176840	-2.70285	1.68876e-09
ENSG00000223573	-3.786	5.6144e-62
ENSG00000275234	-1.33101	9.71842e-16
ENSG00000276980	1.21999	4.3977e-05
ENSG00000268204	1.38015	4.28589e-07
ENSG00000214248	1.41298	3.17018e-06
ENSG00000260500	-2.39153	5.5324e-11
ENSG00000269300	1.56163	0.00019773
ENSG00000277587	-1.56575	0.00170737
ENSG00000267612	-1.50612	3.81641e-06
ENSG00000267387	1.58713	3.21047e-08
ENSG00000267105	2.75479	2.22313e-08
ENSG00000273733	-2.01929	3.91043e-11
ENSG00000266975	1.85371	6.88847e-05
ENSG00000267633	1.44941	0.0137074
ENSG00000267519	1.00945	2.66832e-08
ENSG00000267147	-1.03995	3.64587e-08
ENSG00000268189	1.02224	5.19673e-08
ENSG00000214049	2.40151	3.95899e-19
ENSG00000267453	-1.47591	3.71178e-05
ENSG00000269399	1.15695	7.80974e-20
ENSG00000269191	1.03515	0.000453349
ENSG00000268658	-1.18278	0.00048701
ENSG00000268081	-1.70283	1.2443e-06
ENSG00000268555	-4.76485	1.41297e-35
ENSG00000267886	-1.3969	7.80195e-05
ENSG00000269289	-2.55202	9.11535e-09
ENSG00000269397	-2.30124	1.62345e-13
ENSG00000266976	2.93663	0.0105357
ENSG00000267213	1.45783	7.29786e-14
ENSG00000277013	-1.20328	6.29638e-13
ENSG00000271032	1.9239	1.4351e-14
ENSG00000179066	1.99802	0.000421801
ENSG00000269553	-1.72655	0.000119675
ENSG00000205786	-1.62946	7.63297e-07
ENSG00000233214	-1.79878	1.05237e-13
ENSG00000232680	-1.74605	1.23354e-14
ENSG00000236144	1.71532	3.11677e-48
ENSG00000267328	-2.95818	3.06625e-10
ENSG00000267698	1.13394	3.78176e-12
ENSG00000232677	-1.36438	1.18454e-15
ENSG00000267254	-1.80971	2.25904e-20
ENSG00000226686	-1.58198	2.5661e-07
ENSG00000266916	-2.2904	8.49952e-21
ENSG00000180458	-2.10936	7.62127e-09
ENSG00000267470	-2.03182	4.70211e-24
ENSG00000267640	-1.8846	1.39075e-12
ENSG00000225868	-1.08708	0.00365773
ENSG00000229481	-1.69799	8.95856e-09
ENSG00000267375	1.71223	0.0012135
ENSG00000267892	1.62384	8.73269e-12
ENSG00000268262	-1.85255	1.31242e-06
ENSG00000269843	-1.10219	1.01152e-07
ENSG00000268027	-2.03503	7.82164e-18
ENSG00000268833	1.70472	6.13241e-07
ENSG00000254887	-1.52492	5.09691e-07
ENSG00000259436	-2.17343	9.39232e-17
ENSG00000231412	-3.40436	4.67848e-25
ENSG00000267058	-1.39025	8.85371e-11
ENSG00000266903	-1.12201	6.95772e-12
ENSG00000268401	1.48291	0.000266332
ENSG00000268621	4.59778	2.2946e-15
ENSG00000277531	-2.26019	0.000437361
ENSG00000269487	1.96273	5.5533e-06
ENSG00000269534	1.73452	2.11307e-07
ENSG00000269814	2.9848	1.08672e-09
ENSG00000267898	-1.02387	8.29067e-08
ENSG00000268047	1.4288	7.30838e-05
ENSG00000267968	-2.13803	3.32086e-15
ENSG00000267984	1.54076	0.000257819
ENSG00000273837	-1.39006	4.22153e-07
ENSG00000269834	-1.47912	1.80966e-14
ENSG00000232324	1.68437	1.92732e-05
ENSG00000269873	1.1943	0.0155416
ENSG00000267838	1.13543	4.67365e-09
ENSG00000268734	1.28087	0.000608802
ENSG00000267523	1.18112	2.5602e-08
ENSG00000267096	1.109	2.21532e-05
ENSG00000267776	-1.42205	9.24513e-05
ENSG00000267454	-1.92965	7.26526e-23
ENSG00000166770	-1.79236	2.40001e-26
ENSG00000267421	-1.20691	0.000769968
ENSG00000269696	-1.02715	2.17755e-06
ENSG00000269793	-1.13768	0.000746996
ENSG00000268678	-1.20343	0.00205795
ENSG00000176593	-1.51808	6.20719e-12
ENSG00000268895	-1.2003	4.13595e-13
ENSG00000268307	2.00184	7.02715e-06
ENSG00000268912	-1.43406	1.27496e-19
ENSG00000226644	2.3387	9.49315e-20
ENSG00000277287	1.1054	2.76081e-06
ENSG00000275491	2.40041	5.38713e-18
ENSG00000230176	2.71563	3.52364e-10
ENSG00000226995	1.98741	0.000507138
ENSG00000205181	-1.34642	2.45974e-09
ENSG00000270792	-1.48599	5.49966e-08
ENSG00000224961	-2.97578	8.14202e-33
ENSG00000270777	-1.82752	6.93189e-06
ENSG00000226263	1.4513	0.00624853
ENSG00000233625	-1.64589	0.000151351
ENSG00000228604	1.44898	0.0196086
ENSG00000230387	-1.13002	0.0116159
ENSG00000234832	1.85372	8.94792e-08
ENSG00000230725	2.21088	0.000123884
ENSG00000231081	2.27025	3.48009e-12
ENSG00000225490	-1.15333	1.35966e-05
ENSG00000274364	1.24578	0.0153341
ENSG00000235313	1.20884	1.57559e-11
ENSG00000236559	1.05557	0.00977883
ENSG00000281376	1.83971	3.95179e-25
ENSG00000275576	1.9788	1.98614e-07
ENSG00000260536	1.05544	0.00294616
ENSG00000250917	2.22517	1.98663e-16
ENSG00000272945	2.61664	2.41296e-25
ENSG00000278367	2.62955	2.265e-12
ENSG00000235214	1.52772	8.56787e-05
ENSG00000277235	1.13907	0.0101849
ENSG00000232406	1.07811	2.04806e-05
ENSG00000232907	1.01222	6.74735e-07
ENSG00000276603	1.30281	9.15993e-08
ENSG00000224635	1.20208	1.05464e-09
ENSG00000275401	1.0879	0.000196467
ENSG00000196756	1.88085	2.28862e-61
ENSG00000174365	1.01419	1.3326e-17
ENSG00000277581	1.97149	6.81252e-05
ENSG00000226648	1.15491	7.26884e-06
ENSG00000273951	1.1667	2.44932e-05
ENSG00000226812	1.18951	3.44602e-08
ENSG00000275894	1.45584	1.97327e-06
ENSG00000277022	-1.48921	0.000237093
ENSG00000204044	2.03164	1.94288e-07
ENSG00000231119	-1.12862	0.000223755
ENSG00000224565	-2.34226	1.42517e-07
ENSG00000255438	1.89657	3.46798e-07
ENSG00000235621	-2.4038	1.83532e-12
ENSG00000177410	1.5226	5.82417e-29
ENSG00000231742	1.57634	7.78257e-08
ENSG00000224397	1.60937	2.21293e-17
ENSG00000203999	1.37933	2.45167e-09
[truncated: 155 more rows]
